# Supplementary material for: Genetic interactions affecting human gene expression identified by variance association mapping
Source: eLife. 2014 Apr 25;3:e01381. doi: 10.7554/eLife.01381 (PMC4017648; doi:10.7554/eLife.01381)
Supplement: Supplementary file 1. — A: peak vQTL hits in TwinsUK cohort with evidence of eQTL and discordant QTL and replication evidence in GEUVADIS cohort. B: significant epistasis hits in TwinsUK cohort with p values and effect size estimates in GEUVADIS cohort. C: contribution of cis variants, trans variants, interactions between the two and unique environment to variation in gene expression. DOI: http://dx.doi.org/10.7554/eLife.01381.034 [file elife01381s001.xlsx]

## Sheet: Supplementary File 1A
Supplementary table 1: Peak vQTL hits in twins sample with evidence of eQTL and discordant QTL
Chromosome	Name	Ensembl ID	rsID	ve-QTL location	veQTL p value	FDR	eQTL p value	Discordant	Replication p value	Direction matches
								QTL p value	in GEUVADIS	in both datasets
9	NUDT2	ENSG00000164978	rs10972055	34318654	7.452e-12	0	0.462	0.1366	2.94396e-22	TRUE
19	PLA2G4C	ENSG00000105499	rs8109684	48605470	7.85e-08	0.0013913	0.0008173	0.515	1.30745e-06	TRUE
1	TRIT1	ENSG00000043514	rs3131691	40357268	2.78e-13	0	0.2989	0.3622	2.43496e-06	TRUE
14	IGHV4-61	ENSG00000211970	rs8007269	107181426	4.001e-11	0	2.641e-09	0.01225	7.7343e-06	FALSE
22	TTC38	ENSG00000075234	rs6008473	46674639	5.088e-12	0	0.006643	0.3505	2.01037e-05	TRUE
4	ANXA5	ENSG00000164111	rs6857766	122611285	1.559e-08	0	0.01147	0.6821	3.51565e-05	TRUE
9	POLR1E	ENSG00000137054	rs7033474	37482333	2.988e-06	0.0329901	0.0005224	0.861	4.15767e-05	TRUE
1	GSTM4	ENSG00000168765	rs542338	110192766	3.153e-08	0.00023175	3.137e-07	0.2085	5.05107e-05	TRUE
6	HLA-DQB2	ENSG00000232629	rs114183935	32655730	2.9e-07	0.00788732	0.8651	0.6073	7.60034e-05	TRUE
6	HLA-DQA1	ENSG00000196735	rs9276807	32780156	2.637e-08	0	0.8161	0.0006534	0.000173664	TRUE
10	CALHM2	ENSG00000138172	rs11816762	105955717	5.381e-06	0.0460842	0.71	0.4933	0.000257477	FALSE
21	C21orf56	ENSG00000160284	rs16978976	47626728	2.249e-06	0.0282873	2.475e-07	0.0005854	0.000281375	TRUE
6	SERPINB1	ENSG00000021355	rs318452	2936922	9.995e-07	0.0221591	0.5632	0.781	0.000332206	TRUE
1	CHI3L2	ENSG00000064886	rs942697	111791503	1.719e-08	0	1.077e-36	0.1297	0.000408787	TRUE
6	HLA-DQB1	ENSG00000179344	rs147193449	32227488	3.023e-08	0.000235571	0.5989	0.09359	0.000466701	TRUE
3	MB21D2	ENSG00000180611	rs4687368	192631810	3.739e-06	0.0365252	1.539e-13	0.06633	0.000579266	TRUE
1	LRRIQ3	ENSG00000162620	rs11210427	74644516	1.201e-06	0.0231351	1.147e-22	0.002169	0.000599092	TRUE
7	LMTK2	ENSG00000164715	rs11980911	97775922	2.832e-08	0	9.355e-16	0.0002551	0.000785121	TRUE
10	PLXDC2	ENSG00000120594	rs11011705	20254725	3.074e-07	0.00809313	0.02492	0.8073	0.000892184	TRUE
12	REP15	ENSG00000174236	rs929952	27852430	1.712e-10	0	1.633e-07	0.02016	0.00104744	TRUE
5	NUDT12	ENSG00000112874	rs10900868	102886246	3.544e-10	0	3.108e-05	0.9004	0.00110023	TRUE
2	RPIA	ENSG00000153574	rs10084480	88962014	8.196e-08	0.0015411	0.161	0.1876	0.00164034	TRUE
19	U2AF1L4	ENSG00000161265	rs107068	36204690	6.664e-11	0	0.002906	0.007025	0.0016861	TRUE
18	HDHD2	ENSG00000167220	rs662397	44320836	2.183e-07	0.004375	0.0005347	0.145	0.00201787	TRUE
14	RABGGTA	ENSG00000100949	rs66541674	25709178	5.87e-08	0.000564972	0.5734	0.01293	0.00230881	TRUE
19	TLE6	ENSG00000104953	rs2277739	2977362	3.285e-12	0	8.074e-05	0.359	0.00251801	TRUE
7	STYXL1	ENSG00000127952	rs11763339	75761541	2.834e-07	0.00716316	2.082e-08	0.01078	0.00289853	TRUE
20	C20orf196	ENSG00000171984	rs6053197	5183353	3.114e-06	0.0336783	0.5198	0.1277	0.00294248	TRUE
14	IGHV3-48	ENSG00000211964	rs8007269	107181426	3.99e-08	0.00021254	0.7975	0.8729	0.00452668	FALSE
17	MYO15B	ENSG00000188126	rs16967866	73407381	4.573e-09	0	1.327e-06	2.436e-06	0.00528781	TRUE
17	ARL16	ENSG00000214087	rs7207953	79467883	6.09e-06	0.0488903	0.003628	0.8486	0.00544143	TRUE
11	ACCS	ENSG00000110455	rs4256969	44237513	2.646e-07	0.00641399	0.09716	0.453	0.0072394	TRUE
4	N4BP2	ENSG00000078177	rs10033364	40041816	5.652e-07	0.0159081	0.0001309	0.001433	0.00726138	TRUE
17	SPATA20	ENSG00000006282	rs12943759	48625543	2.866e-06	0.031419	2.467e-13	0.6028	0.00753198	TRUE
20	TH1L	ENSG00000101158	rs236709	57693433	5.487e-06	0.0466777	0.1213	0.003538	0.00813788	TRUE
7	TRGV5	ENSG00000211697	rs7789008	38550286	9.524e-07	0.0217139	2.728e-06	0.4989	0.0110058	TRUE
16	CDK10	ENSG00000185324	rs62068366	89765144	4.215e-11	0	0.0001134	0.5372	0.0141585	TRUE
6	HLA-C	ENSG00000204525	rs114916097	31265314	3.294e-06	0.0347844	0.0001462	0.001804	0.0150171	TRUE
16	NLRC3	ENSG00000167984	rs7190673	3665303	1.294e-08	0	0.6987	0.0163	0.0155957	TRUE
11	PIWIL4	ENSG00000134627	rs11020743	94074514	2.081e-06	0.0276662	0.2613	0.1798	0.016374	TRUE
6	HLA-DQA2	ENSG00000237541	rs35179057	32523349	6.811e-10	0	0.0001519	0.1743	0.0167039	TRUE
5	EMB	ENSG00000170571	rs11741135	49875438	2.613e-07	0.0059684	0.000627	0.1523	0.0197366	TRUE
11	ACY3	ENSG00000132744	rs6591268	67427159	3.122e-09	0	0.04616	0.42	0.019807	TRUE
2	FOXN2	ENSG00000170802	rs759050	47996596	2.047e-06	0.0275558	4.671e-09	0.0003431	0.0198571	TRUE
3	JAGN1	ENSG00000171135	rs143430348	8964515	6.872e-07	0.0174334	0.379	0.1427	0.0204981	FALSE
4	FAM53A	ENSG00000174137	rs7676700	1738129	2.35e-06	0.0285018	0.0001154	0.3528	0.0205211	TRUE
19	PHLDB3	ENSG00000176531	rs10409591	43986855	4.598e-07	0.0130081	0.003982	0.4309	0.0217965	TRUE
22	RRP7A	ENSG00000189306	rs137100	42990074	1.734e-08	0	7.297e-05	0.2442	0.0218822	TRUE
10	TRUB1	ENSG00000165832	rs72822663	117226092	7.052e-09	0	0.8535	0.001465	0.0224513	FALSE
6	TCF19	ENSG00000137310	rs115523621	31175044	2.153e-06	0.0278917	9.047e-16	0.2547	0.0242838	TRUE
22	FAM118A	ENSG00000100376	rs35048184	45743085	4.557e-22	0	9.3e-06	0.1798	0.0250845	TRUE
7	VPS41	ENSG00000006715	rs1017028	38802617	1.674e-09	0	4.624e-05	0.003685	0.0254051	TRUE
3	FAM55C	ENSG00000144815	rs4289325	101363502	2.641e-08	0	0.001132	0.08829	0.0255055	TRUE
6	BAK1	ENSG00000030110	rs2227925	33545340	2.276e-07	0.00477941	2.016e-06	0.007962	0.0271263	TRUE
12	PRKAB1	ENSG00000111725	rs10849690	120114205	1.39e-07	0.00314061	0.7172	0.5696	0.0280866	TRUE
6	BTN3A2	ENSG00000186470	rs12190473	27024687	3.334e-10	0	4.161e-05	0.2662	0.0308928	TRUE
11	PCF11	ENSG00000165494	rs184889750	82887647	7.159e-07	0.0183559	0.8856	0.09951	0.0317609	TRUE
15	C15orf57	ENSG00000128891	rs8026605	40875584	2.714e-08	0	2.331e-28	0.0001884	0.0318515	FALSE
6	PTK7	ENSG00000112655	rs4714613	42457302	5.641e-06	0.0471825	0.5686	0.003643	0.0345897	TRUE
4	SRD5A3	ENSG00000128039	rs12641330	56549059	8.197e-07	0.0195735	0.4103	0.04757	0.0349188	TRUE
10	KIAA1274	ENSG00000107719	rs10740351	72253094	2.853e-09	0	0.6259	0.07236	0.0355836	TRUE
9	CORO2A	ENSG00000106789	rs12554925	100958651	1.894e-06	0.0263386	0.3492	0.03924	0.0358663	TRUE
1	SLC41A1	ENSG00000133065	rs823122	205725028	4.225e-07	0.0123651	0.006021	0.569	0.0365276	TRUE
22	CECR5	ENSG00000069998	rs3764847	17663117	4.62e-10	0	0.4415	0.0256	0.0368191	TRUE
2	RALB	ENSG00000144118	rs4849854	121064915	7.499e-11	0	5.597e-05	0.8038	0.0382938	TRUE
1	RP5-862P8.2	ENSG00000143674	rs12407257	234305176	1.735e-06	0.0257956	0.1359	0.4012	0.0399002	FALSE
18	SERPINB10	ENSG00000242550	rs9947372	61457533	2.185e-08	0	3.752e-07	0.05874	0.0413972	TRUE
17	HEATR6	ENSG00000068097	rs12946928	58187662	5.049e-08	0.000392157	6.69e-07	0.05955	0.0414032	TRUE
19	GIPR	ENSG00000010310	rs8108269	46158513	3.929e-06	0.0372156	0.09963	0.4944	0.0417007	TRUE
17	CISD3	ENSG00000230055	rs1985352	36896929	1.321e-09	0	0.7204	0.8741	0.0486165	TRUE
16	ZFPM1	ENSG00000179588	rs62050265	88631611	2.577e-06	0.0300516	0.6532	0.08677	0.0500286	TRUE
16	TK2	ENSG00000166548	rs94163	66512824	2.648e-06	0.0302848	4.599e-05	0.8495	0.0507507	TRUE
20	TOMM34	ENSG00000025772	rs7273626	43485941	1.9e-06	0.0262959	0.0007984	0.8457	0.0520886	TRUE
9	DNAJC25	ENSG00000059769	rs11794290	114726661	3.511e-06	0.0359486	0.2143	0.007458	0.0528246	TRUE
17	BPTF	ENSG00000171634	rs11656743	65980289	2.71e-07	0.00691643	4.354e-22	6.428e-05	0.0539857	TRUE
2	ZNF804A	ENSG00000170396	rs4363994	185277167	2.744e-08	0	0.8625	0.1247	0.0560372	TRUE
15	NARG2	ENSG00000128915	rs146291503	61719807	5.676e-06	0.047346	0.6806	0.009825	0.0563015	FALSE
10	DPYSL4	ENSG00000151640	rs3793674	134555773	4.556e-07	0.0128599	0.437	0.03586	0.0563082	FALSE
1	PHF13	ENSG00000116273	rs58443742	6281792	4.664e-06	0.0417884	0.8653	0.03659	0.0592967	FALSE
9	PTCH1	ENSG00000185920	rs28504650	98257842	4.448e-08	0.00020429	0.005122	0.009489	0.0607669	TRUE
5	DHFR	ENSG00000228716	rs245013	80047076	3.906e-08	0.000214823	2.848e-05	0.2306	0.0630772	TRUE
1	NTNG1	ENSG00000162631	rs1730871	107636845	1.394e-06	0.0245897	2.338e-05	0.4419	0.0639304	TRUE
18	DSG2	ENSG00000046604	rs6506928	29070824	1.081e-06	0.0226945	0.04463	0.1396	0.064327	TRUE
22	CSF2RB	ENSG00000100368	rs8141354	37745296	5.152e-06	0.0447099	0.83	0.001991	0.0666559	FALSE
7	C1GALT1	ENSG00000106392	rs1010366	7229826	5.396e-12	0	0.0009665	0.3271	0.0693516	TRUE
10	ARL5B	ENSG00000165997	rs4748508	18958646	3.417e-06	0.0355171	0.07009	0.03153	0.0696393	TRUE
2	C2orf3	ENSG00000005436	rs6714189	75680801	3.068e-06	0.0336295	0.8798	0.1661	0.0724252	TRUE
2	COL5A2	ENSG00000204262	rs9677436	190268271	3.309e-06	0.0348847	0.1084	0.3474	0.0770815	TRUE
11	AASDHPPT	ENSG00000149313	rs2462416	106904902	1.586e-06	0.0251908	0.4847	0.00586	0.0777128	TRUE
22	CHKB	ENSG00000100288	rs4824090	50120525	2.445e-08	0	0.395	0.5284	0.0790655	FALSE
8	NAPRT1	ENSG00000147813	rs4874153	144654255	2.955e-07	0.00797753	0.5017	0.1684	0.0809849	TRUE
7	COPG2	ENSG00000158623	rs117618378	130538887	4.15e-06	0.0382667	0.116	0.1067	0.0837176	TRUE
1	HOOK1	ENSG00000134709	rs11572285	60372721	8.577e-14	0	0.01811	0.2501	0.0845833	TRUE
6	GTF2H4	ENSG00000213780	rs114198743	31769155	8.07e-07	0.0193277	0.4331	0.1023	0.0889999	FALSE
2	WDSUB1	ENSG00000196151	rs11684480	160076881	3.545e-06	0.0359951	0.9747	0.6841	0.0898391	TRUE
5	HMGXB3	ENSG00000113716	rs148344319	149004102	5.846e-06	0.0478901	0.1666	0.07357	0.0911674	TRUE
6	MYLIP	ENSG00000007944	rs78929329	15913820	2.857e-06	0.0313857	0.2375	0.5421	0.0913912	TRUE
14	CFL2	ENSG00000165410	rs8005490	35184541	4.181e-06	0.0385421	0.0001303	0.5901	0.092295	TRUE
19	IRF2BP1	ENSG00000170604	rs35514609	46464225	1.745e-06	0.0258354	0.3033	0.007807	0.0938772	FALSE
6	TMEM200A	ENSG00000164484	rs1338904	131362000	3.554e-08	0.000222717	0.6386	0.0004995	0.0982909	TRUE
10	PLEKHA1	ENSG00000107679	rs11200629	124198585	6.278e-06	0.0497112	0.04837	0.8935	0.0986774	TRUE
15	MTHFS	ENSG00000136371	rs8024713	80206958	4.492e-08	0.000203252	0.005701	0.5282	0.101143	TRUE
6	MICB	ENSG00000204516	rs12153855	32074804	3.841e-07	0.010819	0.01896	0.3198	0.101696	TRUE
4	MED28	ENSG00000118579	rs3796812	17582051	2.302e-06	0.0283321	1.213e-29	0.00388	0.102693	TRUE
17	GJC1	ENSG00000182963	rs9909285	42898957	2.868e-06	0.0313979	0.3467	0.5607	0.103267	TRUE
8	BLK	ENSG00000136573	rs13256690	11338568	8.629e-07	0.0200968	9.896e-08	0.1137	0.105949	TRUE
14	METTL21D	ENSG00000100483	rs11157762	51198106	5.306e-07	0.0149932	0.711	0.2161	0.109573	TRUE
5	GM2A	ENSG00000196743	rs28515999	150685035	2.477e-06	0.0293174	0.006465	0.04084	0.110133	TRUE
7	STK17A	ENSG00000164543	rs1181574	43804695	4.876e-09	0	0.3366	0.9632	0.11152	TRUE
3	OXTR	ENSG00000180914	rs237889	8802483	5.955e-06	0.0482472	1.651e-07	0.0961	0.112191	TRUE
2	PXDN	ENSG00000130508	rs7606812	2548628	2.621e-06	0.030158	0.81	0.3327	0.114115	TRUE
22	IGLV6-57	ENSG00000211640	rs361901	22861994	2.366e-07	0.00529801	0.09003	0.03397	0.114272	FALSE
11	YPEL4	ENSG00000166793	rs74556128	58327177	3.061e-07	0.00799112	0.7665	0.0001097	0.116223	FALSE
21	CBR1	ENSG00000159228	rs11702262	37437223	3.294e-06	0.0347918	0.001423	0.2185	0.120977	TRUE
10	IFIT3	ENSG00000119917	rs7909377	90501140	3.609e-07	0.00991224	0.5654	0.06275	0.121309	FALSE
16	NPIP	ENSG00000183426	rs222118	15510600	2.55e-06	0.0299008	0.6367	0.8994	0.127276	TRUE
16	LMF1	ENSG00000103227	rs2729595	1027688	6.901e-08	0.00108597	3.476e-07	0.8954	0.128796	TRUE
6	AIF1	ENSG00000204472	rs115942461	31210462	1.51e-06	0.0249474	0.6931	0.01896	0.136257	FALSE
16	COG7	ENSG00000168434	rs11648329	24346879	3.359e-06	0.0350031	0.2351	0.1519	0.138021	FALSE
13	KDELC1	ENSG00000134901	rs2765584	103827827	3.776e-06	0.0367956	0.9339	0.01034	0.139518	FALSE
20	TTPAL	ENSG00000124120	rs3091249	42355753	1.243e-06	0.0233615	0.6874	0.1843	0.143165	TRUE
19	LMNB2	ENSG00000176619	rs12982784	2346882	4.796e-06	0.0423997	0.5483	0.01803	0.149201	TRUE
22	IGLV3-1	ENSG00000211673	rs5751652	23759573	5.008e-08	0.000393701	0.3302	0.09755	0.149635	FALSE
14	NIN	ENSG00000100503	rs11628591	51490767	6.085e-07	0.016509	0.3816	0.1802	0.150317	TRUE
4	TLR6	ENSG00000174130	rs6834781	38758432	5.895e-07	0.0165799	2.147e-12	0.04423	0.151941	FALSE
12	APOLD1	ENSG00000178878	rs76683670	12342230	4.109e-07	0.0119107	0.5074	4.442e-05	0.153963	TRUE
22	PISD	ENSG00000241878	rs9606763	31062157	4.119e-07	0.0118871	0.9323	0.05793	0.157646	FALSE
3	NPHP3	ENSG00000113971	rs57663669	132424248	7.517e-08	0.00140969	0.005868	0.6559	0.159634	TRUE
19	ZNF880	ENSG00000221923	rs77506493	52795158	8.992e-08	0.00165426	0.01329	0.1837	0.160096	TRUE
5	LMBRD2	ENSG00000164187	rs115579245	36732366	3.936e-06	0.0372568	0.8849	0.2285	0.162569	FALSE
17	TMC6	ENSG00000141524	rs7222517	75558864	3.395e-06	0.0353379	0.7806	0.01421	0.162821	FALSE
6	CCHCR1	ENSG00000204536	rs147985515	31174035	8.392e-08	0.00168776	4.45e-15	0.6119	0.165564	TRUE
22	PDGFB	ENSG00000100311	rs9611146	39718120	2.249e-07	0.00479705	0.2875	0.3052	0.16581	TRUE
4	MAN2B2	ENSG00000013288	rs16840376	7483019	6.236e-06	0.049428	0.8265	0.0005347	0.167077	FALSE
22	NIPSNAP1	ENSG00000184117	rs117762290	29907499	2.747e-06	0.0307868	0.01364	0.004321	0.170094	TRUE
6	AHI1	ENSG00000135541	rs2614265	135715375	3.152e-06	0.0339623	3.704e-18	0.3003	0.170749	TRUE
2	EPB41L5	ENSG00000115109	rs72835511	121468927	1.658e-06	0.025395	0.2903	0.002048	0.177149	FALSE
4	FAM114A1	ENSG00000197712	rs28464959	38324347	7.572e-07	0.0188576	0.81	0.04031	0.181386	TRUE
2	CYS1	ENSG00000205795	rs874878	9245951	6.112e-06	0.0490811	0.8085	0.07278	0.182855	TRUE
8	ASAP1	ENSG00000153317	rs4527833	130761644	3.517e-06	0.0359601	0.4879	0.0761	0.183888	FALSE
7	DFNA5	ENSG00000105928	rs39456	25139497	6.513e-07	0.0169212	0.3851	0.1321	0.184933	TRUE
22	KIAA0930	ENSG00000100364	rs5766584	45638535	1.467e-08	0	4.916e-07	0.0006503	0.185414	TRUE
9	PTGS1	ENSG00000095303	rs10985983	126118412	5.581e-06	0.0469519	0.8348	0.09698	0.186626	FALSE
3	PARP14	ENSG00000173193	rs9875741	122607800	2.233e-11	0	0.03105	0.2797	0.187521	TRUE
14	RAB15	ENSG00000139998	rs74438116	65604925	3.029e-07	0.00802676	0.3651	0.08142	0.191411	FALSE
14	GPR65	ENSG00000140030	rs4899932	88486054	5.803e-06	0.0477689	4.983e-13	0.01135	0.191999	TRUE
11	STK33	ENSG00000130413	rs10840050	8473707	9.402e-09	0	7.684e-06	0.09417	0.192722	TRUE
6	UTRN	ENSG00000152818	rs73000545	144238994	1.376e-06	0.0243311	0.598	0.01674	0.193064	TRUE
4	SEPSECS	ENSG00000109618	rs17697588	26079216	2.405e-06	0.0288755	0.2365	0.04368	0.19626	FALSE
16	COQ9	ENSG00000088682	rs4536466	57745685	3.714e-06	0.0365834	0.0876	0.0004313	0.201092	FALSE
6	SERPINB9	ENSG00000170542	rs6940344	2914609	2.631e-07	0.00630473	8.585e-07	0.3799	0.201382	TRUE
13	LHFP	ENSG00000183722	rs9548748	39950178	3.14e-06	0.0338349	2.893e-10	0.3341	0.202214	TRUE
8	SAMD12	ENSG00000177570	rs2514589	119603222	3.505e-07	0.00981723	7.766e-09	0.02584	0.207719	TRUE
10	CELF2	ENSG00000048740	rs145974332	10070505	3.302e-07	0.00944206	0.5825	0.0712	0.208624	FALSE
4	SPRY1	ENSG00000164056	rs6534403	124382372	1.583e-06	0.0252353	0.01763	0.06764	0.210122	FALSE
2	ROCK2	ENSG00000134318	rs10208872	11490420	3.75e-08	0.000219298	0.001125	0.0717	0.211	FALSE
5	PDZD2	ENSG00000133401	rs185258	31633251	1.658e-08	0	0.6793	0.004196	0.211071	FALSE
20	RBCK1	ENSG00000125826	rs6051726	382627	4.767e-06	0.0422649	0.001317	0.01716	0.211589	TRUE
20	PLAGL2	ENSG00000126003	rs34111982	31479009	6.113e-06	0.0490733	0.03357	0.0003008	0.215126	FALSE
4	FGF2	ENSG00000138685	rs72917835	123742494	2.03e-06	0.0275808	0.02122	0.02786	0.216884	FALSE
11	PNPLA2	ENSG00000177666	rs6598038	330989	4.213e-06	0.0386102	0.5108	0.007587	0.219385	FALSE
3	CD96	ENSG00000153283	rs4682052	111353472	9.666e-08	0.00177994	0.1367	0.05723	0.219668	TRUE
2	PAX8	ENSG00000125618	rs11123172	113984303	5.995e-06	0.0483474	1.61e-38	1.216e-06	0.221812	TRUE
19	HNRNPM	ENSG00000099783	rs12609486	9215382	6.36e-06	0.0499145	0.6933	0.0113	0.223246	TRUE
6	C6orf106	ENSG00000196821	rs2064254	34644863	7.065e-08	0.00107527	0.2918	0.001406	0.224312	TRUE
6	CAPN11	ENSG00000137225	rs3757273	44132782	3.162e-06	0.0340261	1.457e-06	0.5084	0.226881	TRUE
17	NUP88	ENSG00000108559	rs16954560	5252811	1.83e-06	0.0261251	4.259e-07	0.001842	0.227918	FALSE
7	WBSCR27	ENSG00000165171	rs35554452	73149124	6.843e-07	0.0173737	0.0008706	0.01946	0.229699	TRUE
17	ARHGAP27	ENSG00000159314	rs148982040	43565690	2.669e-07	0.00685648	0.003311	0.1312	0.230706	FALSE
22	IGLV3-21	ENSG00000211662	rs5759717	23667731	1.315e-06	0.0238834	0.5596	0.7465	0.23221	TRUE
2	DARS	ENSG00000115866	rs7570971	135837906	2.732e-07	0.00700747	0.03227	0.005142	0.237639	TRUE
3	XPC	ENSG00000154767	rs56089706	13646093	1.401e-06	0.0246059	0.7476	0.0767	0.238098	TRUE
12	RAP1B	ENSG00000127314	rs1975944	69808396	4.195e-06	0.038516	0.8435	0.004327	0.242213	FALSE
6	COL11A2	ENSG00000204248	rs116074832	32190484	1.765e-06	0.0258515	0.6031	0.03267	0.245625	TRUE
3	CD47	ENSG00000196776	rs9810815	108061929	2.767e-08	0	1.404e-07	0.2024	0.24689	TRUE
8	MTUS1	ENSG00000129422	rs118144328	17711253	1.671e-06	0.0254722	5.547e-05	0.2882	0.247103	TRUE
3	HIGD1A	ENSG00000181061	rs12637042	42248273	1.419e-06	0.024639	0.6572	0.09684	0.248119	TRUE
7	C7orf73	ENSG00000243317	rs7806221	135318779	2.047e-06	0.0275415	0.2792	0.879	0.252768	TRUE
15	DPP8	ENSG00000074603	rs76441256	65642366	3.617e-06	0.0363015	0.6514	0.1349	0.25347	FALSE
17	TRPV1	ENSG00000196689	rs733080	3500611	3.902e-06	0.0370986	0.009717	0.06317	0.254893	TRUE
5	SHROOM1	ENSG00000164403	rs493829	131297043	1.93e-06	0.0267061	0.08833	0.0654	0.256401	TRUE
14	PNP	ENSG00000198805	rs4982421	21647420	3.337e-07	0.00960512	0.4587	6.386e-05	0.256502	FALSE
3	FSTL1	ENSG00000163430	rs334555	119804136	3.64e-06	0.0363892	0.0007021	0.1565	0.257159	TRUE
17	LRRC37A2	ENSG00000238083	rs111565798	43763840	2.168e-06	0.02788	0.3511	0.1219	0.258044	FALSE
5	RNF130	ENSG00000113269	rs141704234	179540202	3.326e-07	0.00952381	0.04356	0.1112	0.258717	FALSE
6	TUBB2B	ENSG00000137285	rs9328140	3064983	1.945e-07	0.00411311	0.2191	0.006248	0.27537	TRUE
2	SPRED2	ENSG00000198369	rs2244259	65710688	4.779e-07	0.0134652	0.7411	0.1036	0.277533	FALSE
11	MRPL23	ENSG00000214026	rs4980383	1902097	3.989e-06	0.0376701	0.7282	0.5124	0.279123	TRUE
16	MLST8	ENSG00000167965	rs4786328	2877983	2.551e-06	0.0299127	0.986	0.0003532	0.285197	FALSE
19	LENG8	ENSG00000167615	rs10408999	54603398	1.612e-06	0.0252907	0.4925	0.4706	0.290398	FALSE
3	P2RY1	ENSG00000169860	rs6778256	152234334	3.243e-07	0.00929227	0.5468	0.5066	0.292408	TRUE
4	QDPR	ENSG00000151552	rs1411985	17512147	6.166e-06	0.0492114	2.777e-12	0.6147	0.292561	TRUE
2	NDUFA10	ENSG00000130414	rs720772	240936725	5.072e-07	0.014873	0.4258	0.7045	0.292673	FALSE
17	EFTUD2	ENSG00000108883	rs112109297	43848495	1.275e-06	0.0236918	0.4102	0.007876	0.293039	TRUE
6	MTRF1L	ENSG00000112031	rs9397575	153321485	2.794e-08	0	3.474e-06	0.2911	0.293263	FALSE
1	ATF6	ENSG00000118217	rs12096504	161917749	3.051e-07	0.00800445	0.4761	0.6597	0.294794	TRUE
14	IGHA2	ENSG00000211890	rs2582516	105314093	3.231e-06	0.0344433	0.08995	0.02538	0.296391	FALSE
9	C9orf95	ENSG00000106733	rs773153	77674983	1.763e-06	0.0258804	2.169e-11	0.7746	0.296892	TRUE
7	GNA12	ENSG00000146535	rs7799969	3339443	1.007e-06	0.0221436	0.7462	0.09262	0.298386	TRUE
9	SLC31A1	ENSG00000136868	rs10817465	116005783	3.689e-06	0.0365519	0.9514	0.2981	0.300193	TRUE
8	C8orf55	ENSG00000130193	rs118062821	144629422	5.352e-06	0.0460037	0.254	0.08544	0.301466	TRUE
17	FTSJ3	ENSG00000108592	rs12940055	61722142	1.195e-06	0.023153	1.846e-06	0.0204	0.30162	TRUE
2	ARHGAP25	ENSG00000163219	rs10173586	68997420	1.295e-06	0.0237321	2.711e-06	0.01849	0.30287	TRUE
16	COTL1	ENSG00000103187	rs432666	84363644	5.329e-06	0.0459514	0.9956	0.1837	0.303004	TRUE
11	SPTY2D1	ENSG00000179119	rs4345941	18968603	6.049e-07	0.0165375	0.661	0.009925	0.303682	TRUE
7	FASTK	ENSG00000164896	rs2373748	150165280	6.744e-07	0.0174338	0.604	0.6954	0.303827	FALSE
16	NUBP2	ENSG00000095906	rs636673	1153022	4.666e-06	0.0417735	0.9141	0.4264	0.307402	TRUE
7	GIGYF1	ENSG00000146830	rs10272079	101202785	3.659e-06	0.0363818	0.218	0.04158	0.311412	FALSE
6	NT5E	ENSG00000135318	rs9362203	86082738	3.517e-06	0.0359821	0.0005687	0.7638	0.31329	TRUE
3	MUC20	ENSG00000176945	rs1666176	195732565	1.237e-06	0.0234299	0.0003324	0.6384	0.314826	TRUE
2	TTC7A	ENSG00000068724	rs13394109	47223543	1.977e-06	0.0271303	0.7705	0.07242	0.316008	FALSE
12	FGFR1OP2	ENSG00000111790	rs75844820	26642048	2.863e-06	0.0313436	0.6712	0.000518	0.319846	TRUE
17	MYH3	ENSG00000109063	rs9909920	9946782	4.362e-06	0.039677	0.4253	0.2474	0.323039	FALSE
14	KIAA1737	ENSG00000198894	rs11627117	77467973	5.183e-06	0.0447959	4.783e-05	0.3009	0.327098	TRUE
2	IGKV1-12	ENSG00000243290	rs4246599	88464926	3.332e-07	0.00961538	0.05122	0.1224	0.328519	FALSE
12	C12orf44	ENSG00000123395	rs10219651	53315157	3.877e-06	0.0370902	0.8298	0.3171	0.331743	FALSE
22	TNFRSF13C	ENSG00000159958	rs1009544	42239348	6.379e-10	0	1.77e-05	0.7228	0.334846	TRUE
10	C10orf68	ENSG00000150076	rs2503997	33215725	1.485e-06	0.0250681	0.6639	0.122	0.336465	TRUE
14	HEATR5A	ENSG00000129493	rs55674235	32202794	2.315e-06	0.0283329	0.261	0.2072	0.336472	FALSE
5	ERAP1	ENSG00000164307	rs42441	96045137	2.022e-06	0.0273772	0.8004	0.2485	0.339279	TRUE
22	IGLV1-51	ENSG00000211644	rs361901	22861994	7.446e-07	0.0186887	0.1486	0.8715	0.339402	FALSE
7	MACC1	ENSG00000183742	rs2041017	20280329	2.286e-06	0.0283103	1.849e-06	0.09703	0.33991	TRUE
8	FAM86B1	ENSG00000186523	rs12681142	11802601	1.086e-06	0.0227086	0.003947	0.1933	0.340013	TRUE
2	PRKD3	ENSG00000115825	rs6751012	37556864	8.961e-07	0.0213363	0.1542	0.6195	0.340483	TRUE
17	GAA	ENSG00000171298	rs12150151	78065499	1.708e-06	0.0257297	0.01959	0.4014	0.340505	FALSE
15	PARP16	ENSG00000138617	rs6494475	64634884	2.33e-06	0.0283403	0.1281	0.4951	0.343481	TRUE
10	FAM22D	ENSG00000214562	rs17110418	90015725	1.461e-06	0.0250228	0.9109	0.2385	0.348336	TRUE
11	AP003068.23	ENSG00000254614	rs1194077	65336158	3.641e-06	0.0363819	0.06062	0.2007	0.349133	TRUE
17	PCGF2	ENSG00000056661	rs3785456	36899560	9.938e-08	0.00192308	0.8438	0.7274	0.350991	TRUE
3	NT5DC2	ENSG00000168268	rs113186741	53097492	7.245e-07	0.0184054	0.01846	0.0003377	0.356414	TRUE
16	CPNE7	ENSG00000178773	rs12445225	89741790	3.472e-06	0.0356675	0.6891	0.01092	0.357289	FALSE
2	ALS2	ENSG00000003393	rs13015089	202649708	2.202e-07	0.00448319	1.119e-12	0.572	0.357414	TRUE
2	PPP3R1	ENSG00000221823	rs1838199	68562670	1.117e-06	0.022778	0.2291	0.1075	0.358077	FALSE
1	CDK11A	ENSG00000008128	rs6681938	1781220	3.247e-08	0.000229095	0.2515	0.6327	0.3621	TRUE
11	MS4A14	ENSG00000166928	rs7123969	59595357	6.217e-06	0.0494192	0.9832	0.8764	0.368942	TRUE
7	WDR60	ENSG00000126870	rs6976925	158465255	1.369e-06	0.0243294	0.0007084	0.9501	0.369226	TRUE
7	NRCAM	ENSG00000091129	rs6976804	108092036	1.233e-06	0.0234528	0.5514	0.4368	0.370358	FALSE
19	ZNF562	ENSG00000171466	rs2288940	10341658	4.472e-06	0.0405655	0.6226	0.1733	0.373076	TRUE
19	PIP5K1C	ENSG00000186111	rs352502	4191051	1.565e-06	0.0251554	0.3287	0.0438	0.374897	FALSE
14	IGHV3-15	ENSG00000211943	rs4983590	105646179	5.03e-06	0.0440193	0.6915	0.339	0.377793	FALSE
17	TMEM101	ENSG00000091947	rs1642595	42065227	2.957e-06	0.0325551	1.719e-05	0.07517	0.383228	TRUE
17	HOXB7	ENSG00000120087	rs62064978	46376973	4.745e-06	0.042109	2.649e-06	0.02756	0.383908	TRUE
1	ZNHIT6	ENSG00000117174	rs2785082	86170061	6.055e-06	0.0486246	5.148e-06	0.004206	0.384301	FALSE
7	EZH2	ENSG00000106462	rs13233277	147722727	3.526e-06	0.0359756	0.04232	0.08455	0.385994	TRUE
4	NAAA	ENSG00000138744	rs6841543	76917530	1.392e-06	0.0246125	0.7795	0.9172	0.386063	TRUE
22	IGLV2-8	ENSG00000211671	rs361901	22861994	2.597e-10	0	0.1108	0.000266	0.389159	FALSE
19	EMR1	ENSG00000174837	rs3890540	6923022	5.419e-07	0.0155235	0.07041	0.3988	0.390385	TRUE
19	CADM4	ENSG00000105767	rs59764328	43992837	4.459e-06	0.0404066	0.7343	0.9796	0.39269	TRUE
15	GOLGA8B	ENSG00000215252	rs7495444	34897222	2.975e-10	0	0.0006157	0.02411	0.393928	TRUE
15	EIF2AK4	ENSG00000128829	rs2934194	40239912	1.52e-06	0.0249775	0.01871	0.0002696	0.395097	FALSE
1	NPL	ENSG00000135838	rs12094036	183558174	5.134e-07	0.0148897	0.1295	0.07904	0.395422	FALSE
2	37500	ENSG00000168385	rs11690426	242333889	7.822e-07	0.0193125	0.001867	0.3028	0.396116	TRUE
19	ZNF404	ENSG00000176222	rs34228745	43950225	3.746e-07	0.0101989	0.6155	0.2678	0.396497	FALSE
6	DHX16	ENSG00000204560	rs144630613	30436780	7.286e-07	0.0183254	0.6546	0.1775	0.403317	TRUE
2	ZC3H8	ENSG00000144161	rs13019891	113829869	2.653e-07	0.00687646	0.6041	0.6178	0.404265	TRUE
21	IFNGR2	ENSG00000159128	rs114697003	35715194	2.55e-06	0.0299079	0.7303	0.2232	0.40887	TRUE
14	IGHV1-3	ENSG00000211935	rs2735806	105595101	2.748e-06	0.0307798	0.7325	0.002924	0.413582	FALSE
10	REEP3	ENSG00000165476	rs2671528	65791943	1.305e-06	0.0237127	0.535	0.001221	0.414476	FALSE
14	TRIM9	ENSG00000100505	rs74358250	52293442	2.993e-06	0.0329613	0.0355	0.0001409	0.418585	TRUE
7	CREB5	ENSG00000146592	rs62449895	28583117	6.196e-06	0.049387	0.7538	0.000263	0.4211	FALSE
9	FGD3	ENSG00000127084	rs76859785	95629798	1.153e-07	0.00211161	2.803e-06	0.1691	0.42704	TRUE
3	CDCP1	ENSG00000163814	rs9857201	45211399	2.092e-06	0.0278735	0.1543	0.0107	0.42762	TRUE
16	ATMIN	ENSG00000166454	rs72831131	81738549	1.525e-06	0.0250825	0.7256	0.08824	0.428529	FALSE
12	DDX51	ENSG00000185163	rs4964961	132117752	2.573e-07	0.00599295	0.4872	0.002722	0.42864	FALSE
16	MTHFSD	ENSG00000103248	rs1623029	86392934	3.344e-06	0.0349927	0.9667	0.0003393	0.42872	FALSE
2	SP140	ENSG00000079263	rs10203146	231185144	3.147e-06	0.0338983	1.501e-07	0.4368	0.42999	TRUE
21	CCT8	ENSG00000156261	rs7283930	30461373	1.477e-07	0.00351617	4.745e-16	0.01669	0.432221	TRUE
1	CTSS	ENSG00000163131	rs7530922	150023407	1.775e-06	0.0259053	0.01151	0.5574	0.433748	TRUE
19	ZNF266	ENSG00000174652	rs8109800	9343939	1.631e-06	0.025195	0.8288	0.02016	0.439431	TRUE
8	RAB2A	ENSG00000104388	rs16927011	62127265	1.083e-06	0.0227397	0.167	0.4122	0.440884	TRUE
17	USP6	ENSG00000129204	rs62072760	5097573	1.201e-08	0	0.0007632	0.1871	0.441589	TRUE
18	CEP192	ENSG00000101639	rs562151	13066123	4.038e-09	0	1.906e-34	6.884e-06	0.446609	FALSE
3	ADPRH	ENSG00000144843	rs6768044	119289841	2.07e-06	0.0275755	7.883e-05	0.9681	0.447744	TRUE
7	DGKI	ENSG00000157680	rs112417	137620895	1.31e-08	0	0.2817	0.0009267	0.449344	TRUE
7	MEST	ENSG00000106484	rs79609250	130047975	3.238e-06	0.0344711	0.8635	0.2141	0.455506	FALSE
20	ZNF341	ENSG00000131061	rs6142038	32464001	5.689e-06	0.0474304	0.02172	0.203	0.455916	TRUE
2	TTC27	ENSG00000018699	rs4952275	33123701	2.559e-06	0.0299835	0.1157	0.5631	0.456988	FALSE
5	ERAP2	ENSG00000164308	rs3806936	96213607	8.725e-08	0.00166945	5.749e-10	0.1799	0.461116	TRUE
8	NCALD	ENSG00000104490	rs16868423	102789990	1.182e-06	0.0230387	0.3025	0.1143	0.461808	TRUE
15	DIS3L	ENSG00000166938	rs6494558	66520931	1.628e-06	0.0252169	0.0009557	0.03789	0.468231	TRUE
6	XXbac-BPG246D15.9	ENSG00000250264	rs9357155	32809848	2.351e-06	0.0284879	0.2353	0.4496	0.469604	FALSE
22	IGLV2-11	ENSG00000211668	rs361901	22861994	2.004e-06	0.0270412	0.004395	0.0008489	0.470127	FALSE
2	TMEM37	ENSG00000171227	rs77670866	121154630	4.585e-06	0.0409466	0.4322	0.06024	0.470295	TRUE
20	CPNE1	ENSG00000214078	rs6058339	34460479	2.859e-07	0.00747029	0.6525	0.2626	0.473993	TRUE
2	MFSD6	ENSG00000151690	rs10204628	191488854	5.423e-06	0.0461744	3.653e-15	0.005072	0.474515	FALSE
5	CLPTM1L	ENSG00000049656	rs13180333	2099667	5.672e-07	0.0160635	0.247	0.04902	0.475757	TRUE
6	TRAM2	ENSG00000065308	rs72930089	52484229	3.818e-06	0.0368647	0.01826	0.08519	0.475869	TRUE
16	SDR42E1	ENSG00000184860	rs310023	81422309	4.272e-06	0.0391264	0.7001	0.06434	0.476025	TRUE
15	AP3S2	ENSG00000157823	rs7176255	90389822	2.458e-06	0.0292507	7.263e-05	0.01096	0.481535	FALSE
11	SESN3	ENSG00000149212	rs598481	94778065	2.976e-06	0.0327265	0.961	0.00932	0.485484	TRUE
3	CCDC66	ENSG00000180376	rs9834064	56590069	1.097e-09	0	0.0003121	0.1324	0.491185	TRUE
3	LRRC34	ENSG00000171757	rs115223735	169308111	2.672e-07	0.00684852	0.5698	0.07468	0.494936	TRUE
5	RGS14	ENSG00000169220	rs3811872	176021041	3.161e-06	0.0340334	0.1044	0.06718	0.503558	FALSE
7	BRAT1	ENSG00000106009	rs10254662	2821600	5.851e-06	0.0478591	0.2394	0.5604	0.505614	TRUE
5	C5orf45	ENSG00000161010	rs10045755	179446371	1.698e-06	0.0256818	0.261	0.001833	0.509668	FALSE
17	ORMDL3	ENSG00000172057	rs8080546	38146966	4.634e-06	0.0415997	0.001324	0.3814	0.511701	TRUE
15	CATSPER2	ENSG00000166762	rs512431	43541939	3.608e-08	0.000221484	0.0003117	0.1718	0.512117	TRUE
3	IFT57	ENSG00000114446	rs9810815	108061929	6.446e-07	0.0171836	0.001091	0.4746	0.519055	TRUE
15	DAPK2	ENSG00000035664	rs332271	64339748	3.892e-06	0.0370715	0.3702	0.1348	0.52215	TRUE
7	PVRIG	ENSG00000213413	rs66809776	99782124	3.128e-07	0.00854795	0.08167	0.6078	0.524266	TRUE
16	MPHOSPH6	ENSG00000135698	rs9932437	83112996	1.811e-06	0.0260055	0.4095	0.04119	0.525674	TRUE
19	UNC13A	ENSG00000130477	rs62119893	17669956	2.244e-07	0.0048	0.1998	0.9879	0.52826	FALSE
4	DCAF16	ENSG00000163257	rs13104751	17835007	1.646e-07	0.00366599	0.1351	0.2539	0.529093	TRUE
11	NUMA1	ENSG00000137497	rs79877538	71268188	8.253e-07	0.0195751	0.8942	0.5144	0.539318	FALSE
15	BCL2L10	ENSG00000137875	rs11636722	53010055	6.944e-07	0.0177867	0.6627	0.007192	0.541694	TRUE
14	PCNX	ENSG00000100731	rs17177913	71681140	3.247e-06	0.0345967	0.0009099	0.02262	0.543643	TRUE
22	ATXN10	ENSG00000130638	rs132068	45451860	4.99e-06	0.0439751	0.564	0.1811	0.545429	TRUE
6	MDC1	ENSG00000137337	rs116714571	30783282	7.626e-07	0.0190402	0.04531	0.4236	0.547221	FALSE
5	SKIV2L2	ENSG00000039123	rs291618	55592664	2.388e-06	0.0287515	0.198	0.001342	0.547766	TRUE
21	NDUFV3	ENSG00000160194	rs1893599	44333685	4.504e-08	0.000203046	3.237e-07	0.2167	0.550339	TRUE
22	NDUFA6	ENSG00000184983	rs133344	42419433	9.712e-10	0	0.03644	0.07747	0.550898	TRUE
5	IQGAP2	ENSG00000145703	rs138919816	75653549	6.012e-06	0.0484365	0.8688	0.4286	0.554805	TRUE
22	PEX26	ENSG00000215193	rs1296787	18012012	4.729e-06	0.0421314	0.3521	0.1462	0.558348	FALSE
22	MIR4763	ENSG00000197182	rs71311621	47011561	5.262e-06	0.045513	0.9083	0.09875	0.559387	TRUE
16	PLEKHG4	ENSG00000196155	rs74248468	66557441	3.834e-06	0.0369243	0.04651	0.4499	0.56192	TRUE
13	SLAIN1	ENSG00000139737	rs1279442	78292340	7.299e-07	0.0183899	0.0001168	0.1448	0.563473	TRUE
22	IGLV2-23	ENSG00000211660	rs361901	22861994	6.708e-08	0.000912409	0.02904	0.05848	0.564698	FALSE
17	NPLOC4	ENSG00000182446	rs35816741	79549601	4.008e-07	0.0117059	0.002118	0.5229	0.569944	TRUE
10	C10orf103	ENSG00000236756	rs114102117	75796397	1.347e-06	0.0244102	0.1116	0.1701	0.575331	FALSE
19	ARRDC2	ENSG00000105643	rs8108534	17792352	2.874e-06	0.0315249	0.8402	0.1475	0.580172	FALSE
2	LIMS1	ENSG00000169756	rs183673920	109111385	1.935e-06	0.0267776	0.8652	0.266	0.583508	FALSE
15	LDHAL6B	ENSG00000171989	rs16941262	59593551	4.145e-06	0.0382651	0.3316	0.9033	0.585859	FALSE
9	PTPLAD2	ENSG00000188921	rs4399021	20691002	3.169e-06	0.0339897	0.03757	0.2713	0.588253	FALSE
2	RNASEH1	ENSG00000171865	rs11693058	3882855	5.361e-06	0.04604	0.5199	0.2403	0.589706	TRUE
19	C19orf29	ENSG00000105298	rs1682801	3120739	3.731e-06	0.0365073	0.834	0.5452	0.595407	FALSE
7	ZNF117	ENSG00000152926	rs34848990	64515446	2.962e-06	0.0326144	0.004142	0.1335	0.59612	FALSE
4	STIM2	ENSG00000109689	rs4692132	26890432	8.99e-19	0	0.007792	0.3363	0.597123	TRUE
1	MCOLN3	ENSG00000055732	rs10493768	85972024	1.483e-06	0.0250985	0.377	0.004439	0.598422	FALSE
19	ZNF730	ENSG00000183850	rs73023603	23093984	3.144e-06	0.0338918	0.2772	0.2532	0.598635	TRUE
1	GSTM3	ENSG00000134202	rs28396184	109574421	2.104e-06	0.027876	0.3861	0.1755	0.600279	TRUE
20	ZNF337	ENSG00000130684	rs6138608	25567320	1.436e-06	0.0248238	0.006798	0.1673	0.600373	TRUE
22	A4GALT	ENSG00000128274	rs6003191	43810747	3.35e-07	0.00959488	0.4393	0.1512	0.602481	FALSE
10	ANKRD26	ENSG00000107890	rs67262546	27392568	5.471e-08	0.000382775	0.0001821	0.01672	0.604517	TRUE
9	SURF6	ENSG00000148296	rs1179036	136237539	3.061e-06	0.0335067	0.03369	0.3748	0.611991	TRUE
1	C1orf216	ENSG00000142686	rs116628323	36274130	6.653e-07	0.017192	0.809	0.005288	0.612767	FALSE
1	S100A10	ENSG00000197747	rs2932594	151951581	3.356e-06	0.035025	1.429e-10	0.9418	0.621267	TRUE
3	LAMP3	ENSG00000078081	rs13098857	182831612	3.972e-06	0.0376032	0.5096	0.3758	0.626582	TRUE
1	AGMAT	ENSG00000116771	rs7533125	15883744	1.012e-06	0.0222301	0.1325	0.04378	0.631186	TRUE
7	MIOS	ENSG00000164654	rs28914837	7759826	5.734e-07	0.0160456	0.8121	0.2747	0.63335	TRUE
6	CENPW	ENSG00000203760	rs9401826	125815409	2.592e-06	0.030007	0.9067	0.0007214	0.636062	TRUE
16	CMIP	ENSG00000153815	rs11863371	80535458	4.82e-06	0.0427392	0.9851	0.311	0.636387	FALSE
10	ASB13	ENSG00000196372	rs4748304	5648101	2.633e-06	0.0303016	0.5826	0.4235	0.636641	TRUE
9	IL11RA	ENSG00000137070	rs146755345	34030308	2.133e-06	0.0279318	0.002363	0.2436	0.637803	TRUE
2	TTLL4	ENSG00000135912	rs7595361	218619201	4.636e-06	0.0415923	0.3152	0.009709	0.640364	TRUE
3	PRRT3	ENSG00000163704	rs40336	10379603	4.075e-06	0.0381494	0.1124	0.02986	0.643391	TRUE
4	BEND4	ENSG00000188848	rs6447065	41406966	1.286e-06	0.0237136	0.8339	0.2181	0.648541	FALSE
15	DMXL2	ENSG00000104093	rs9806214	51901923	2.216e-07	0.00458772	5.038e-08	0.8106	0.649316	FALSE
20	LPIN3	ENSG00000132793	rs111347844	40007465	1.513e-07	0.00361865	0.002629	0.04086	0.650551	TRUE
3	ACAD11	ENSG00000240303	rs1197305	133102687	1.023e-06	0.02223	0.6552	0.06891	0.651025	FALSE
17	AC091172.1	ENSG00000204815	rs112440684	39644345	3.179e-06	0.0340744	0.9111	0.2987	0.654286	TRUE
19	NLRP2	ENSG00000022556	rs139236727	56093123	2.822e-06	0.0312781	0.957	0.05777	0.65521	TRUE
12	ALKBH2	ENSG00000189046	rs11831762	109740593	6.816e-07	0.0174019	0.6327	0.0143	0.655884	TRUE
11	PGM2L1	ENSG00000165434	rs4944845	73311723	9.702e-07	0.0218064	0.4355	0.001415	0.657956	FALSE
7	AGAP3	ENSG00000133612	rs3800779	150671214	3.288e-06	0.034702	0.3526	0.1073	0.658992	FALSE
12	LRIG3	ENSG00000139263	rs2712516	59152365	5.093e-06	0.0444102	0.9548	0.05967	0.659483	TRUE
10	DNA2	ENSG00000138346	rs12773594	70332672	6.414e-06	0.0499381	4.307e-06	0.2755	0.661569	FALSE
10	BAMBI	ENSG00000095739	rs10826519	29090606	3.147e-07	0.00861505	5.417e-19	9.269e-10	0.661633	TRUE
13	KIAA1704	ENSG00000133114	rs4245331	44676441	2.339e-06	0.0284946	0.4824	0.001327	0.663212	FALSE
7	GIMAP4	ENSG00000133574	rs2177189	150263323	3.844e-06	0.036962	2.589e-06	0.9981	0.666354	TRUE
12	DPY19L2	ENSG00000177990	rs7980949	64058641	4.031e-08	0.000210526	0.2613	0.02236	0.667371	FALSE
6	TMEM14B	ENSG00000137210	rs1915958	11459652	5.969e-06	0.0482968	0.3722	0.008183	0.668636	FALSE
14	LRRC16B	ENSG00000186648	rs2877649	24954002	3.271e-06	0.0346487	0.7156	0.01209	0.672304	FALSE
6	LEMD2	ENSG00000161904	rs145389180	34183832	2.024e-06	0.0273558	0.7864	0.5163	0.673072	FALSE
16	RNPS1	ENSG00000205937	rs9926680	2965635	2.914e-06	0.0322409	0.2072	0.00818	0.673555	TRUE
4	KIAA1109	ENSG00000138688	rs4833820	123225355	5.142e-06	0.0446304	7.179e-07	0.2902	0.675203	FALSE
5	P4HA2	ENSG00000072682	rs156026	131539229	3.337e-06	0.0349875	0.7815	0.08408	0.676948	TRUE
4	TACC3	ENSG00000013810	rs139033323	1341266	3.279e-06	0.0346965	0.7532	0.279	0.679906	TRUE
19	LILRA6	ENSG00000244482	rs798890	55118528	1.543e-09	0	1.666e-05	0.03683	0.683407	TRUE
15	GRINL1A	ENSG00000255529	rs71478671	58783051	6.099e-06	0.0490094	0.2198	0.002507	0.685286	FALSE
11	TRIM66	ENSG00000166436	rs11601382	7706315	4.906e-07	0.0139122	0.6161	0.01181	0.687451	FALSE
1	HMGN2	ENSG00000198830	rs6668958	26902388	1.643e-06	0.0251369	2.775e-09	0.4005	0.68862	FALSE
8	LAPTM4B	ENSG00000104341	rs2512024	98952826	1.627e-06	0.0252461	0.04961	0.000706	0.695653	TRUE
19	C19orf79	ENSG00000229833	rs7253116	8672076	4.705e-06	0.0421165	0.8482	0.1603	0.695744	TRUE
12	TFCP2	ENSG00000135457	rs2047041	52059613	1.991e-06	0.0271527	0.4424	0.1713	0.704931	TRUE
7	POLM	ENSG00000122678	rs17172218	43545897	2.172e-06	0.0278519	0.374	0.03716	0.705581	TRUE
4	NAP1L5	ENSG00000177432	rs3017897	89646706	3.506e-06	0.0358964	3.166e-08	0.1007	0.707341	TRUE
6	SERAC1	ENSG00000122335	rs2885910	158503451	8.419e-08	0.00168634	4.452e-05	0.009176	0.709611	FALSE
19	ZNF155	ENSG00000204920	rs1233454	44741827	1.592e-06	0.0251978	1.799e-05	0.05497	0.710787	TRUE
22	ARSA	ENSG00000100299	rs139777	50103405	1.837e-06	0.0262466	0.9995	0.06082	0.711435	TRUE
6	CMAHP	ENSG00000168405	rs186591814	25165822	4.511e-07	0.012897	1.305e-12	0.4221	0.711657	TRUE
3	PLCD1	ENSG00000187091	rs2070487	38418005	1.261e-06	0.0236545	0.0789	0.002123	0.711668	FALSE
8	BIN3	ENSG00000147439	rs140913756	23125178	4.631e-06	0.0415789	0.9696	0.4397	0.712494	FALSE
20	CDS2	ENSG00000101290	rs1287019	5826422	4.296e-06	0.0391064	0.7947	0.6886	0.712755	TRUE
4	TMEM33	ENSG00000109133	rs71608101	42168329	3.476e-06	0.0356456	0.002102	0.07006	0.713244	TRUE
12	CDK17	ENSG00000059758	rs77974165	96471122	2.456e-06	0.0292308	0.7993	0.3467	0.721289	FALSE
6	C6orf174	ENSG00000214338	rs146306561	127993057	3.14e-06	0.0338276	0.01708	0.0595	0.722266	FALSE
11	FJX1	ENSG00000179431	rs353610	35101496	3.18e-06	0.0341526	0.4875	0.4526	0.72264	TRUE
13	MCF2L	ENSG00000126217	rs7982909	113649986	1.107e-06	0.0226594	0.3437	0.002879	0.72268	TRUE
2	NAGK	ENSG00000124357	rs1833350	71330823	1.951e-07	0.00411047	0.7445	0.6183	0.727688	TRUE
20	SAMD10	ENSG00000130590	rs11542296	61907982	2.159e-06	0.0279646	0.1471	0.2384	0.730123	FALSE
12	NACA	ENSG00000196531	rs140920138	57889011	3.94e-06	0.037281	0.9614	0.7353	0.731652	TRUE
7	PILRB	ENSG00000121716	rs7798226	99987236	1.944e-08	0	1.946e-12	0.1227	0.732267	TRUE
8	SORBS3	ENSG00000120896	rs2280939	23156880	2.479e-07	0.00534442	0.5097	0.0007287	0.733381	FALSE
4	SRP72	ENSG00000174780	rs9996593	57175316	4.643e-06	0.0416414	2.843e-11	0.8339	0.734218	FALSE
10	PDCD4	ENSG00000150593	rs4265534	113060536	1.621e-06	0.0252827	0.1734	0.002884	0.735812	FALSE
6	HLA-DOA	ENSG00000204252	rs114564778	32177263	8.248e-07	0.01959	0.693	0.005061	0.739689	FALSE
15	ANXA2	ENSG00000182718	rs4238353	61601645	6.292e-07	0.0168644	0.7201	0.03472	0.740036	FALSE
6	IER3	ENSG00000137331	rs143769375	30775255	8.847e-07	0.0205109	0.7766	0.2518	0.746292	TRUE
11	BSCL2	ENSG00000168000	rs72931336	62687336	3.165e-07	0.00860098	6.187e-11	0.9893	0.746924	TRUE
17	SCRN2	ENSG00000141295	rs4619445	46694827	2.602e-06	0.0300559	0.6023	0.8671	0.749436	FALSE
4	ADH5	ENSG00000197894	rs10022044	99656293	5.409e-06	0.0462439	0.6289	0.2833	0.751752	TRUE
9	C9orf93	ENSG00000164989	rs770193	15862959	3.007e-07	0.0080402	1.416e-05	0.01189	0.752495	TRUE
4	TLR10	ENSG00000174123	rs5743614	38798935	3.841e-08	0.00021645	1.805e-11	0.1803	0.763541	TRUE
3	ULK4	ENSG00000168038	rs11714981	41883402	9.552e-10	0	4.167e-12	2.391e-05	0.764973	TRUE
1	KIF14	ENSG00000118193	rs553580	201477481	2.175e-06	0.0278379	0.8505	0.1064	0.766458	TRUE
14	IGHV1-69	ENSG00000211973	rs8007269	107181426	2.636e-10	0	3.964e-13	0.1335	0.766681	TRUE
11	LRFN4	ENSG00000173621	rs182580570	66420922	2.272e-06	0.0282673	0.1602	0.1036	0.76811	TRUE
1	TMCO4	ENSG00000162542	rs12021819	20316055	1.256e-06	0.0235788	0.7951	0.02967	0.768345	FALSE
19	KIAA1683	ENSG00000130518	rs62138075	19039652	6.197e-06	0.0494107	0.6102	0.09124	0.769142	FALSE
1	EXO1	ENSG00000174371	rs181502785	242556874	2.767e-06	0.0310173	0.9591	0.9709	0.776481	TRUE
6	HLA-DRB5	ENSG00000198502	rs145938181	32421010	3.719e-11	0	0.638	0.1159	0.789427	TRUE
16	CTU2	ENSG00000174177	rs62068540	89299442	9.658e-07	0.0218931	0.125	0.3337	0.793172	FALSE
17	SLC25A19	ENSG00000125454	rs2007844	73601247	4.596e-06	0.0412397	0.3658	0.2798	0.794119	TRUE
17	AC091132.2	ENSG00000214425	rs242948	43913544	1.613e-06	0.025276	1.133e-13	0.08588	0.798915	TRUE
7	AC005071.3	ENSG00000233389	rs139972715	100848046	3.19e-06	0.0341515	0.09365	0.6083	0.802866	TRUE
5	SLC9A3	ENSG00000066230	rs75557328	539470	3.991e-06	0.0376628	3.65e-05	0.1687	0.803016	TRUE
11	SLC37A2	ENSG00000134955	rs12276292	124946817	6.263e-06	0.0496718	0.09809	0.5009	0.806078	FALSE
16	SETD6	ENSG00000103037	rs7200765	58674485	5.987e-06	0.0483618	0.01017	0.1375	0.810387	TRUE
2	CAMKMT	ENSG00000143919	rs13013678	43854836	2.302e-06	0.0283251	0.2628	0.7918	0.814561	FALSE
18	RPL17	ENSG00000215472	rs7242374	47043463	1.439e-07	0.00311394	1.727e-05	0.1243	0.817061	TRUE
4	CXCL10	ENSG00000169245	rs6814014	76998421	5.829e-06	0.0478796	0.02426	0.5658	0.817486	TRUE
14	C14orf159	ENSG00000133943	rs10083403	91672575	1.548e-06	0.0250298	0.002029	0.01726	0.822458	TRUE
10	HMX3	ENSG00000188620	rs2362963	125464431	5.527e-06	0.0468134	0.06744	0.0002035	0.823866	FALSE
5	DOK3	ENSG00000146094	rs9800309	177400785	4.028e-07	0.0118644	0.2276	0.1809	0.824952	TRUE
6	LRRC16A	ENSG00000079691	rs9295648	25186568	1.49e-07	0.00363636	0.1099	0.08158	0.829969	TRUE
7	SUMF2	ENSG00000129103	rs10251184	56083359	5.203e-07	0.0149336	6.703e-08	0.2174	0.830053	FALSE
1	C1orf122	ENSG00000197982	rs17559337	38039034	1.154e-06	0.0228972	0.4949	0.0117	0.831224	TRUE
11	ZNF195	ENSG00000005801	rs11026713	3379317	1.727e-06	0.0257901	1.105e-05	0.5983	0.836492	TRUE
4	CRIPAK	ENSG00000179979	rs2279279	1164277	3.561e-06	0.0360291	3.653e-06	0.09096	0.838811	FALSE
19	THOP1	ENSG00000172009	rs7254381	2305765	2.303e-06	0.0283042	0.5941	0.01895	0.841074	TRUE
1	CDC42BPA	ENSG00000143776	rs10916122	227513033	3.253e-08	0.00022805	6.138e-10	0.5617	0.854426	FALSE
5	RELL2	ENSG00000164620	rs115040572	140234608	4.757e-06	0.0422038	0.9503	0.06706	0.857856	TRUE
22	JOSD1	ENSG00000100221	rs2269609	38864460	5.872e-07	0.0165146	0.9421	0.07297	0.860076	TRUE
16	AC010536.1	ENSG00000205047	rs72811404	88700061	5.756e-06	0.0476733	0.6625	0.00334	0.861302	FALSE
2	IGKV4-1	ENSG00000211598	rs4246599	88464926	3.885e-09	0	0.03054	0.01681	0.86244	FALSE
1	FCRL5	ENSG00000143297	rs6696889	157682233	4.706e-06	0.0421445	0.1362	0.3401	0.864601	TRUE
5	ALDH7A1	ENSG00000164904	rs62391554	125937686	1.856e-07	0.0037859	4.01e-09	0.2583	0.865621	FALSE
6	POU5F1	ENSG00000204531	rs116627368	31314012	1.574e-07	0.00358374	6.104e-08	0.03765	0.867519	TRUE
18	PARD6G	ENSG00000178184	rs8096070	77911148	7.434e-07	0.0187107	0.3526	0.02499	0.869936	TRUE
20	C20orf27	ENSG00000101220	rs6084636	4111428	2.088e-06	0.0278435	0.8443	0.03538	0.871071	FALSE
15	TMEM87A	ENSG00000103978	rs142733061	42034183	2.314e-06	0.0283538	0.6959	0.03155	0.872964	FALSE
10	TET1	ENSG00000138336	rs79684075	70797996	3.038e-06	0.0333261	0.7499	0.1899	0.875149	TRUE
20	IFT52	ENSG00000101052	rs8113845	42750408	6.123e-07	0.0165594	0.85	0.1093	0.876508	TRUE
15	C15orf38-AP3S2	ENSG00000250021	rs7176255	90389822	3.554e-06	0.0360324	3.08e-05	0.03358	0.878826	FALSE
19	RPS28	ENSG00000233927	rs2972570	8381163	7.105e-07	0.0183273	3.553e-20	0.01334	0.878941	TRUE
2	AHSA2	ENSG00000173209	rs778752	61776902	7.595e-07	0.0188355	0.904	0.004313	0.880976	FALSE
8	KIAA1875	ENSG00000179698	rs11787024	144239099	2.16e-07	0.00439147	0.7472	0.1122	0.888197	FALSE
12	RIMKLB	ENSG00000166532	rs7299505	8716936	6.893e-09	0	0.6386	0.00405	0.889748	TRUE
2	C2orf63	ENSG00000162994	rs6738970	55513738	4.581e-06	0.0408969	4.694e-07	0.001773	0.891119	FALSE
8	RP11-148O21.2	ENSG00000255354	rs2618448	11379041	5.488e-08	0.000381679	0.1062	0.08559	0.892547	TRUE
6	PERP	ENSG00000112378	rs4341022	138325071	5.676e-06	0.0473538	0.4324	0.7774	0.894172	FALSE
12	GPR133	ENSG00000111452	rs61940168	130843719	6.22e-06	0.0494036	0.8023	0.006219	0.895489	TRUE
2	RASGRP3	ENSG00000152689	rs35909307	33806628	2.443e-07	0.00538278	2.647e-06	0.0157	0.895694	TRUE
16	TNFRSF17	ENSG00000048462	rs12448492	11549350	1.633e-06	0.0251732	0.4213	0.7644	0.897696	TRUE
10	NET1	ENSG00000173848	rs10795279	5525451	5.046e-06	0.0440771	0.006287	0.117	0.913316	TRUE
2	MTIF2	ENSG00000085760	rs10188143	55505372	4.731e-06	0.0421239	0.1229	0.4477	0.913606	TRUE
6	HSPA1A	ENSG00000204389	rs144439195	31662229	6.108e-07	0.0165736	0.9546	0.008267	0.916971	FALSE
6	HLA-DRB1	ENSG00000196126	rs115072738	32402778	3.339e-07	0.0096	3.042e-24	0.002414	0.917686	TRUE
3	FANCD2	ENSG00000144554	rs78526265	10614549	2.139e-06	0.0279034	0.08103	0.9518	0.922591	TRUE
20	SLC9A8	ENSG00000197818	rs143828566	47837816	3.186e-07	0.00880914	0.6719	0.9365	0.925994	FALSE
9	ANXA1	ENSG00000135046	rs11143519	75791397	5.793e-06	0.0477753	0.986	0.008299	0.927401	TRUE
15	IVD	ENSG00000128928	rs56221586	40650402	3.204e-06	0.0342711	0.06834	0.795	0.93179	FALSE
19	ZNF331	ENSG00000130844	rs8108313	54084977	2.305e-06	0.0282903	0.6645	0.1916	0.933525	FALSE
8	RP11-297N6.4	ENSG00000255046	rs1809357	11489357	8.552e-08	0.00168209	0.08973	0.06824	0.936069	TRUE
13	SETDB2	ENSG00000136169	rs2490637	50545357	3.008e-06	0.0331149	0.6616	0.2729	0.940056	TRUE
6	DDX43	ENSG00000080007	rs34096074	73777037	5.001e-06	0.043964	0.7807	0.08941	0.94111	TRUE
17	MYBBP1A	ENSG00000132382	rs60442382	3602977	5.73e-06	0.047602	0.6523	0.07222	0.944987	TRUE
10	ZNF239	ENSG00000196793	rs1124957	44013272	1.124e-07	0.00212443	0.8229	0.06703	0.946181	FALSE
11	MTL5	ENSG00000132749	rs3019751	68923597	3.919e-06	0.0371958	0.5693	0.09558	0.947237	TRUE
22	IGLV2-14	ENSG00000211666	rs361901	22861994	6.165e-06	0.0492191	0.1277	0.0001208	0.959883	FALSE
10	GATA3	ENSG00000107485	rs537544	8108382	1.121e-06	0.0227395	0.3267	0.8596	0.963706	FALSE
1	CD101	ENSG00000134256	rs4620527	117530621	2.671e-08	0	0.4904	0.5063	0.976464	FALSE
19	GPX4	ENSG00000167468	rs35126999	1121890	9.129e-07	0.02135	0.0013	0.007603	0.978236	FALSE
7	ZNF783	ENSG00000204946	rs10277339	148094769	5.812e-06	0.0478197	0.1327	0.8464	0.979676	FALSE
11	PAAF1	ENSG00000175575	rs61902362	73877090	4.625e-06	0.0414939	0.104	0.518	0.979783	FALSE
15	HERC1	ENSG00000103657	rs58603603	64142608	2.252e-07	0.0047941	0.5559	0.03527	0.979967	TRUE
8	PPP1R3B	ENSG00000173281	rs446470	8775770	5.568e-06	0.0469421	0.8688	0.2795	0.986687	TRUE
6	EPB41L2	ENSG00000079819	rs9375709	130500415	3.14e-06	0.0338422	0.4545	0.01096	0.992015	TRUE
1	KLHL12	ENSG00000117153	rs4611086	203631313	6.048e-06	0.048616	0.8855	0.333	0.992293	FALSE
4	PARM1	ENSG00000169116	rs79253097	76552951	6.316e-06	0.0498285	0.6538	0.07003	0.99447	TRUE
22	MYO18B	ENSG00000133454	rs5761441	26643093	2.35e-07	0.0053108	0.977	0.06461	0.996056	FALSE
10	KAZALD1	ENSG00000107821	rs11190635	102414627	4.87e-06	0.0430845	0.8657	0.002832	0.996866	TRUE
12	IRAK3	ENSG00000090376	rs1152906	66627123	5.704e-06	0.0474571	0.01208	0.3673	0.997348	FALSE
8	FAM167A	ENSG00000154319	rs1692821	11699988	1.318e-08	0	0.0002871	0.2666	0.997439	TRUE
6	C4A	ENSG00000244731	rs149778146	31840794	4.088e-06	0.0381367	0.005163	0.5882	0.999418	TRUE
22	GSTT1	ENSG00000184674	rs762283	24943582	8.486e-09	0	0.2114	0.006866	NA	NA
12	RDH5	ENSG00000135437	12-56084676	56084676	1.404e-08	0	0.3297	0.3494	NA	NA
6	MDGA1	ENSG00000112139	6-37682839	37682839	2.101e-08	0	9.031e-12	0.9834	NA	NA
22	IGLV8-61	ENSG00000211638	rs361901	22861994	3.248e-08	0.000228311	0.02343	0.002705	NA	NA
20	HSPA12B	ENSG00000132622	rs62206555	3730524	5.421e-08	0.000384615	0.0001738	0.4623	NA	NA
16	RP11-419C5.2	ENSG00000226232	16-70011854	70011854	8.995e-08	0.00165289	0.8302	0.6215	NA	NA
11	BTBD18	ENSG00000233436	11-58465074	58465074	1.564e-07	0.00359364	0.4618	0.3337	NA	NA
14	IGHV3-73	ENSG00000211976	rs17113331	107159860	3.599e-07	0.00993275	0.9898	0.2905	NA	NA
9	ASPN	ENSG00000106819	rs10821128	96209943	6.076e-07	0.0165232	0.8893	0.0101	NA	NA
17	HIC1	ENSG00000177374	17-1761160	1761160	7.8e-07	0.0193498	0.8053	0.1561	NA	NA
4	C4orf48	ENSG00000243449	rs79484746	2271856	1.044e-06	0.0224618	0.1203	0.8856	NA	NA
15	MKRN3	ENSG00000179455	rs11161366	24203913	1.362e-06	0.0243125	0.5714	0.2855	NA	NA
9	RP11-195F19.29	ENSG00000258728	rs72722982	35137358	1.712e-06	0.0256933	0.2464	0.0854	NA	NA
8	CHRNA2	ENSG00000120903	rs143296192	26859941	1.791e-06	0.0258869	0.9364	0.2674	NA	NA
5	GALNT10	ENSG00000164574	5-153665948	153665948	2.291e-06	0.0283457	0.003027	0.3917	NA	NA
16	C16orf96	ENSG00000205832	rs35124728	5562611	2.741e-06	0.0308219	0.3957	0.04085	NA	NA
17	ALDH3A2	ENSG00000072210	17-20514691	20514691	3.534e-06	0.0359464	0.4	0.0002988	NA	NA
11	ARHGAP32	ENSG00000134909	rs614466	128633118	4.058e-06	0.0379867	0.9013	0.02574	NA	NA
7	POMZP3	ENSG00000146707	7-75458921	75458921	4.29e-06	0.0391425	0.3295	0.3361	NA	NA
16	UNKL	ENSG00000059145	16-2183866	2183866	4.353e-06	0.0396545	0.4959	0.01856	NA	NA
12	GALNT6	ENSG00000139629	12-52696930	52696930	4.754e-06	0.0421629	0.7589	0.1023	NA	NA
10	SFXN2	ENSG00000156398	10-104528175	104528175	5.638e-06	0.047198	0.0003694	0.2249	NA	NA
10	AL162407.1	ENSG00000234631	rs11575645	115323642	6.333e-06	0.0498599	0.5037	0.7123	NA	NA

## Sheet: Supplementary File 1B
Supplementary Table 2: Significant epistasis hits in twins sample with p values and effect size estimates in 1000 genomes cohort
Chromosome	Gene name	Ensembl ID	Epistasis SNP	ve-QTL SNP	Location,	Location,	P (TwinsUK)	P value (dominance	Additive variance	Interaction variance	Additive variance	Interaction variance	P value	P value (controlled	Replication in
					epistasis SNP	ve-QTL		corrected)	in TwinsUK	in TwinsUK	in GEUVADIS	in GEUVADIS	in GEUVADIS	for Haplotype effects)	GEUVADIS?
9	NUDT2	ENSG00000164978	rs10814083	rs10972055	34256347	34318654	1.88049e-53	1.25609e-53	0.514239	-0.327806	0.310277	-0.12779	5.42582e-22	4.69422e-06	TRUE
6	HLA-DQB2	ENSG00000232629	rs1049130	rs114183935	32629859	32655730	1.83218e-62	7.37632e-63	0.554911	-0.337063	0.0994854	-0.161446	2.912e-21	0.01798	TRUE
6	HLA-DQB2	ENSG00000232629	rs9274666	rs114183935	32636543	32655730	3.45464e-18	6.30465e-17	0.504493	-0.368086	0.157739	-0.118702	1.04051e-16	0.00618864	TRUE
17	SPATA20	ENSG00000006282	rs1122634	rs12943759	48621365	48625543	3.11593e-69	6.78587e-68	0.588453	0.300919	0.403724	0.0781821	1.42049e-15	0.000492428	TRUE
6	POU5F1	ENSG00000204531	rs115631087	rs116627368	31249790	31314012	6.9469e-34	2.15172e-35	0.358905	0.311296	0.00754628	0.115626	6.62825e-14	0.00361158	TRUE
6	SERPINB1	ENSG00000021355	rs6940344	rs318452	2914609	2936922	2.3955e-36	2.4205e-36	0.542097	-0.227451	0.11651	-0.102442	7.65863e-14	0.0133302	TRUE
4	ANXA5	ENSG00000164111	rs12511956	rs6857766	122606943	122611285	3.09125e-37	6.8707e-40	0.424559	-0.411206	0.0557543	-0.103666	3.80766e-13	0.000166439	TRUE
6	TCF19	ENSG00000137310	rs115921994	rs115523621	31143582	31175044	2.58543e-36	2.77421e-35	0.00907938	-0.58468	0.20094	-0.0763717	1.48171e-11	0.000101364	TRUE
6	HLA-C	ENSG00000204525	rs116012228	rs114916097	31274027	31265314	3.35276e-18	3.09044e-18	0.577067	0.160499	0.183173	0.0768459	2.17397e-11	4.14554e-08	TRUE
19	PHLDB3	ENSG00000176531	rs2682547	rs10409591	44001057	43986855	1.66977e-14	1.1175e-13	0.0853722	-0.269443	0.0568611	-0.0857804	4.82973e-11	0.0726981	TRUE
1	TRIT1	ENSG00000043514	rs230273	rs3131691	40292698	40357268	1.05205e-24	4.93091e-26	0.160938	-0.324282	0.110952	-0.0795374	7.05741e-11	0.000454803	TRUE
2	RPIA	ENSG00000153574	rs1473958	rs10084480	89001005	88962014	2.80865e-18	2.72625e-18	0.22493	0.215519	0.0468267	0.078733	4.03102e-10	0.0229163	TRUE
6	SERPINB9	ENSG00000170542	rs318439	rs6940344	2920834	2914609	2.39431e-20	4.34517e-20	0.381883	-0.180306	0.0418246	-0.0652475	1.55503e-08	0.0152685	TRUE
15	MTHFS	ENSG00000136371	rs2586172	rs8024713	80232539	80206958	1.49166e-08	1.69992e-10	0.366981	0.343844	0.0530708	0.062174	2.86197e-08	0.000103179	TRUE
6	CAPN11	ENSG00000137225	rs4711770	rs3757273	44136899	44132782	1.15972e-27	9.61854e-28	0.415574	-0.31198	0.0363522	-0.0632175	2.90256e-08	0.0425114	TRUE
6	HLA-DQB2	ENSG00000232629	rs9274252	rs114183935	32631345	32655730	5.61252e-12	1.19201e-13	0.659349	-0.202283	0.244996	-0.0478998	4.97923e-08	0.0224199	TRUE
7	TRGV5	ENSG00000211697	rs2080284	rs7789008	38417556	38550286	1.30546e-20	2.58001e-20	0.53327	-0.204751	0.148477	-0.04596	5.2693e-07	0.0597183	TRUE
6	HLA-DRB5	ENSG00000198502	rs115029600	rs145938181	32389255	32421010	2.16201e-21	1.87766e-22	0.545993	0.349358	0.0926835	0.0473697	8.17066e-07	0.00181799	TRUE
22	TTC38	ENSG00000075234	rs7285194	rs6008473	46763490	46674639	2.19891e-37	4.05499e-38	0.011921	0.354511	0.0341333	0.0463567	2.32542e-06	0.0018656	TRUE
1	NTNG1	ENSG00000162631	rs7522583	rs1730871	107700444	107636845	5.23665e-14	3.01299e-13	0.35963	0.308202	0.0310629	0.0451119	3.32097e-06	0.00122714	TRUE
1	CDC42BPA	ENSG00000143776	rs11800959	rs10916122	227410007	227513033	5.8984e-60	1.39243e-58	0.00103473	-0.543673	0.0347461	-0.0446225	3.60362e-06	0.0206935	TRUE
7	C1GALT1	ENSG00000106392	rs2190935	rs1010366	7283017	7229826	1.05339e-32	8.65094e-38	0.333825	-0.347862	0.0340064	-0.0431426	5.31505e-06	0.0123042	TRUE
17	LRRC37A2	ENSG00000238083	rs113991933	rs111565798	43854502	43763840	1.17639e-08	9.20972e-09	0.255772	-0.0872995	0.103992	-0.035519	1.84449e-05	0.00256453	TRUE
10	PLXDC2	ENSG00000120594	rs1111367	rs11011705	20273583	20254725	2.54799e-11	4.33695e-11	0.30296	0.154418	0.086016	0.035298	2.37596e-05	0.027758	TRUE
18	PARD6G	ENSG00000178184	rs8099311	rs8096070	77917062	77911148	3.54307e-22	6.92114e-23	0.294276	0.254821	0.0179104	0.0378449	2.42644e-05	0.00742341	TRUE
22	TNFRSF13C	ENSG00000159958	rs5996092	rs1009544	42344408	42239348	1.67353e-15	5.45726e-14	0.131319	0.378623	0.0137549	0.0372494	2.93398e-05	0.0117045	TRUE
8	BLK	ENSG00000136573	rs1531576	rs13256690	11338146	11338568	2.96132e-24	1.13515e-24	0.330353	0.397572	0.172028	0.0312292	2.97154e-05	0.0397285	TRUE
6	POU5F1	ENSG00000204531	rs150702250	rs116627368	31201248	31314012	2.19067e-13	4.7518e-12	0.324498	0.241435	0.0720009	0.0340036	3.87992e-05	0.0749378	TRUE
6	MYLIP	ENSG00000007944	rs6459420	rs78929329	15873122	15913820	7.19804e-14	1.52289e-13	0.358427	0.35132	0.0384225	0.0333191	6.35857e-05	0.00817792	TRUE
5	EMB	ENSG00000170571	rs3857298	rs11741135	49848298	49875438	5.56325e-23	3.16023e-24	0.331457	-0.4072	0.0500114	-0.0325038	7.08434e-05	0.066558	TRUE
11	ACCS	ENSG00000110455	rs7127924	rs4256969	44085687	44237513	1.04571e-23	6.97162e-24	0.10333	0.339619	0.261873	0.0250737	7.52952e-05	0.00113007	TRUE
2	AHSA2	ENSG00000173209	rs3821224	rs778752	61404905	61776902	7.7511e-24	1.64843e-24	0.310814	0.296986	0.00933215	0.0242128	0.00080847	0.0132607	TRUE
2	AHSA2	ENSG00000173209	rs10496091	rs778752	61482261	61776902	6.21943e-11	1.00973e-11	0.387478	0.204309	0.0142215	0.0232454	0.00100302	0.0297586	TRUE
22	NDUFA6	ENSG00000184983	rs5996149	rs133344	42784201	42419433	5.57691e-18	6.11629e-17	0.0811498	0.566729	0.0438604	0.0223828	0.00104702	0.0478688	TRUE
19	GPX4	ENSG00000167468	rs12460104	rs35126999	1100792	1121890	2.61613e-23	2.5873e-23	0.0285524	0.390427	0.0563046	0.0219951	0.00107422	0.0611228	TRUE
8	NAPRT1	ENSG00000147813	rs10097092	rs4874153	144717155	144654255	9.99256e-11	5.12558e-11	0.217872	0.381107	0.0906882	0.021171	0.00108096	0.0568258	TRUE
15	MTHFS	ENSG00000136371	rs6495452	rs8024713	80164088	80206958	5.21615e-35	2.49309e-35	0.105384	-0.449917	0.100908	-0.0206975	0.00115445	0.0347472	TRUE
4	KIAA1109	ENSG00000138688	rs72684728	rs4833820	122991202	123225355	4.0396e-15	5.20252e-15	0.00188461	0.15726	0.00658495	0.022824	0.00116761	NA	TRUE
11	BSCL2	ENSG00000168000	rs489381	rs72931336	62652063	62687336	1.59128e-38	1.51488e-34	0.550947	-0.296154	0.00903042	-0.0211778	0.00174822	NA	TRUE
17	USP6	ENSG00000129204	rs2585266	rs62072760	5213391	5097573	2.53401e-11	7.0218e-10	0.0446903	0.298684	0.0546689	0.0198973	0.00189646	0.00139053	TRUE
15	HERC1	ENSG00000103657	rs925251	rs58603603	64175124	64142608	3.56744e-13	1.99777e-13	0.299867	-0.116257	0.044302	-0.0192372	0.0023917	0.00420704	TRUE
15	HERC1	ENSG00000103657	rs1867272	rs58603603	64181470	64142608	2.02339e-27	5.7135e-27	0.421799	-0.268665	0.0435891	-0.0191747	0.00244078	0.074425	TRUE
3	IFT57	ENSG00000114446	rs6768207	rs9810815	108024901	108061929	7.25288e-13	9.01423e-14	0.448929	0.374384	0.0135199	0.0182421	0.00362108	0.056275	TRUE
1	LRRIQ3	ENSG00000162620	rs186136551	rs11210427	74565900	74644516	1.86923e-19	1.24855e-25	0.571147	0.0771157	0.186686	0.0146367	0.00410739	0.0891435	TRUE
10	PLXDC2	ENSG00000120594	rs11594747	rs11011705	20198883	20254725	1.15932e-15	8.97707e-16	0.029591	0.0186084	0.0203515	0.0172112	0.00457995	0.009073	TRUE
6	SERAC1	ENSG00000122335	rs144544735	rs2885910	158771190	158503451	3.00594e-10	2.96008e-10	0.0100502	0.173945	0.0296777	0.0167797	0.0049137	0.0634062	TRUE
17	MYO15B	ENSG00000188126	rs1671012	rs16967866	73574300	73407381	5.82642e-11	3.57791e-11	0.052747	0.163046	0.0650986	0.0138594	0.00925344	0.01824	TRUE
10	ANKRD26	ENSG00000107890	rs9651377	rs67262546	27367098	27392568	2.7318e-14	2.33985e-13	0.0145921	0.180011	0.00155457	0.0141046	0.0110822	0.0258749	TRUE
16	CPNE7	ENSG00000178773	rs2437954	rs12445225	89641661	89741790	8.31903e-09	7.83026e-09	0.0705917	-0.138237	0.00325473	-0.0136877	0.0122744	0.0448781	TRUE
18	DSG2	ENSG00000046604	rs1626261	rs6506928	29121896	29070824	1.11195e-08	3.07539e-09	0.076759	0.211526	0.0202409	0.0132823	0.0128471	0.0163737	TRUE
10	GATA3	ENSG00000107485	rs263428	rs537544	8085536	8108382	1.84849e-08	1.10246e-08	0.352958	0.14494	0.00826871	0.0123336	0.0172054	NA	TRUE
1	HOOK1	ENSG00000134709	rs9436605	rs11572285	60243182	60372721	1.08168e-22	1.12922e-22	0.244873	0.245771	0.0199487	0.0117994	0.0190919	0.0722861	TRUE
10	C10orf68	ENSG00000150076	rs7084137	rs2503997	32686543	33215725	7.78467e-11	5.54179e-11	0.225361	-0.191387	0.00790556	-0.0103858	0.0289171	NA	TRUE
2	FOXN2	ENSG00000170802	rs4953550	rs759050	48356453	47996596	6.12828e-16	9.34305e-16	0.00128443	0.293634	0.0129806	0.00934221	0.0378253	NA	TRUE
7	STK17A	ENSG00000164543	rs12702045	rs1181574	43507689	43804695	1.90433e-09	3.71644e-09	0.329679	-0.249167	0.0340305	-0.00880232	0.0415993	0.0552908	TRUE
22	TNFRSF13C	ENSG00000159958	rs28885520	rs1009544	42260329	42239348	3.32479e-29	2.58612e-30	0.182584	-0.240307	0.00115807	-0.00774599	0.0602462	0.0716626	TRUE
1	CDC42BPA	ENSG00000143776	rs74140145	rs10916122	227423946	227513033	6.78113e-16	4.55368e-15	0.128008	-0.000350359	0.0332093	-0.00656781	0.0787106	0.0161286	TRUE
6	HLA-DQA2	ENSG00000237541	rs28383187	rs35179057	32572113	32523349	4.60553e-51	4.19656e-54	0.51047	-0.268468	0.142357	-0.100526	5.5113e-14	0.981253	FALSE
9	POLR1E	ENSG00000137054	rs4878694	rs7033474	37496198	37482333	8.45328e-14	1.54666e-13	0.0125971	-0.246197	0.208078	-0.0741117	2.4665e-11	0.244972	FALSE
18	SERPINB10	ENSG00000242550	rs1243039	rs9947372	61498396	61457533	1.81524e-18	4.41941e-18	0.328097	-0.231421	0.107426	-0.0706464	9.64889e-10	0.137311	FALSE
12	REP15	ENSG00000174236	rs2113875	rs929952	27822947	27852430	2.20033e-32	7.72018e-32	0.543128	0.349721	0.0738942	0.0655659	7.89799e-09	0.227511	FALSE
6	BTN3A2	ENSG00000186470	rs9393692	rs12190473	26276650	27024687	1.39622e-10	1.56198e-10	0.458549	0.259315	0.0745036	0.0628072	1.6482e-08	0.537152	FALSE
6	BTN3A2	ENSG00000186470	rs7746199	rs12190473	27261324	27024687	7.68132e-43	4.85365e-46	0.00629106	-0.51726	0.0872474	-0.0604302	2.49538e-08	0.381558	FALSE
10	ARL5B	ENSG00000165997	rs7896918	rs4748508	18972378	18958646	5.03479e-20	8.56163e-20	0.26357	0.353756	0.0667385	0.0463973	1.5175e-06	0.513743	FALSE
6	HLA-DQB1	ENSG00000179344	rs9274574	rs147193449	32635219	32227488	3.93334e-15	2.64575e-15	0.432218	0.1395	0.176108	0.0391278	2.63478e-06	0.30357	FALSE
22	FAM118A	ENSG00000100376	rs6006736	rs35048184	45769906	45743085	1.78427e-44	1.4717e-51	0.695704	0.18003	0.171583	0.0320432	2.34082e-05	0.996453	FALSE
17	GJC1	ENSG00000182963	rs17629022	rs9909285	42992049	42898957	4.8909e-32	8.04226e-32	0.0966287	0.590487	0.245095	0.0275631	4.00698e-05	0.327537	FALSE
19	GIPR	ENSG00000010310	rs2238691	rs8108269	46179043	46158513	7.72678e-10	5.89306e-13	0.0498142	0.313106	0.0282311	0.0336282	6.43052e-05	0.464373	FALSE
5	NUDT12	ENSG00000112874	rs291844	rs10900868	102859998	102886246	6.44415e-53	1.63025e-58	0.0525405	-0.603756	0.0847172	-0.0306139	8.57097e-05	0.58796	FALSE
6	HLA-DQA1	ENSG00000196735	rs114629278	rs9276807	32654037	32780156	6.71159e-14	6.89138e-14	0.536327	0.119649	0.261457	0.0238261	0.000115081	0.171539	FALSE
3	CDCP1	ENSG00000163814	rs6441894	rs9857201	45206579	45211399	2.23892e-31	2.8735e-43	0.555572	0.17817	0.0570947	0.0290744	0.000164038	0.508102	FALSE
6	HLA-DQB1	ENSG00000179344	rs9270856	rs147193449	32570839	32227488	3.0167e-10	2.13292e-09	0.219966	-0.21364	0.232762	0.0218774	0.000292263	0.0115968	FALSE
10	PLEKHA1	ENSG00000107679	rs72631113	rs11200629	124213449	124198585	7.07511e-13	5.45744e-13	0.319789	0.19427	0.0565206	0.026541	0.000321579	0.118399	FALSE
6	HLA-DQA2	ENSG00000237541	rs80225417	rs35179057	32603825	32523349	4.81283e-09	7.11679e-10	0.642899	-0.128549	0.385907	-0.0167999	0.000390021	0.331535	FALSE
4	STIM2	ENSG00000109689	rs6448479	rs4692132	26850653	26890432	1.26074e-52	5.41855e-53	0.092468	-0.566986	0.156684	-0.0230612	0.000391128	0.729398	FALSE
16	CDK10	ENSG00000185324	rs62068372	rs62068366	89785107	89765144	5.87128e-26	7.10696e-30	0.0271091	-0.349122	0.0715148	-0.0253833	0.000391858	0.432515	FALSE
3	ULK4	ENSG00000168038	rs4973892	rs11714981	41829397	41883402	7.71348e-25	6.54813e-28	0.434045	-0.285025	0.104752	-0.0239046	0.000459353	0.516541	FALSE
10	ASB13	ENSG00000196372	rs2386649	rs4748304	5680842	5648101	7.35653e-13	7.69201e-13	0.0340737	0.194659	0.0339026	0.0245839	0.000628554	0.235555	FALSE
7	SUMF2	ENSG00000129103	rs13245637	rs10251184	56068980	56083359	1.59843e-22	4.05785e-24	0.256403	-0.219424	0.0255271	-0.0246851	0.000646872	0.120283	FALSE
4	QDPR	ENSG00000151552	rs4698601	rs1411985	17511921	17512147	8.03255e-20	1.48307e-19	0.404438	0.28292	0.131807	0.0216847	0.00070695	0.0979864	FALSE
17	NPLOC4	ENSG00000182446	rs3830068	rs35816741	79622899	79549601	7.03535e-10	8.05551e-11	0.428472	-0.100546	0.0176725	-0.0241675	0.000776453	0.118817	FALSE
6	HLA-DQA2	ENSG00000237541	rs140309064	rs35179057	32435699	32523349	2.88194e-18	1.8819e-18	0.578514	-0.202784	0.225322	-0.0181419	0.00104465	0.883935	FALSE
7	C7orf73	ENSG00000243317	rs4728358	rs7806221	135250270	135318779	3.49572e-23	2.08168e-26	0.471125	-0.247422	0.0575271	-0.0212047	0.00131605	0.704433	FALSE
2	PRKD3	ENSG00000115825	rs2110965	rs6751012	37472804	37556864	1.42534e-18	2.45179e-18	0.17975	-0.266102	0.0443095	-0.0214368	0.00133885	0.291247	FALSE
17	BPTF	ENSG00000171634	rs9902223	rs11656743	65818944	65980289	1.70714e-10	7.56647e-14	0.528378	0.21704	0.0710429	0.0204634	0.00148144	0.215679	FALSE
10	DNA2	ENSG00000138346	rs7911862	rs12773594	70209648	70332672	1.72705e-12	1.13307e-11	0.00466864	-0.180265	0.141007	-0.018835	0.00151979	0.602804	FALSE
6	MICB	ENSG00000204516	rs114555180	rs12153855	31643522	32074804	1.65852e-24	1.92715e-25	0.0945844	-0.355188	0.0526529	-0.0205239	0.00162349	0.134393	FALSE
4	NAAA	ENSG00000138744	rs10336	rs6841543	76922988	76917530	1.06481e-17	9.29961e-18	0.566444	0.164026	0.107513	0.0184312	0.00209599	0.541945	FALSE
5	DHFR	ENSG00000228716	rs865646	rs245013	79942357	80047076	2.36665e-16	4.42024e-16	0.589439	0.0869953	0.147966	0.0175102	0.0021498	0.497242	FALSE
7	LMTK2	ENSG00000164715	rs11976289	rs11980911	97682653	97775922	1.39971e-18	4.15924e-20	0.513027	0.224229	0.116739	0.0159565	0.00403585	0.936491	FALSE
6	IER3	ENSG00000137331	rs116714571	rs143769375	30783282	30775255	1.43621e-16	2.29066e-16	0.126019	-0.212832	0.00502865	-0.0175383	0.00451253	0.15501	FALSE
2	ARHGAP25	ENSG00000163219	rs11685613	rs10173586	69023078	68997420	1.72007e-18	2.59048e-18	0.393183	-0.394938	0.0306972	-0.0165096	0.0052514	0.39454	FALSE
9	C9orf95	ENSG00000106733	rs10869497	rs773153	77705570	77674983	2.91526e-25	3.28165e-26	0.00012326	-0.643479	0.265198	-0.0121277	0.00600978	0.13335	FALSE
1	AGMAT	ENSG00000116771	rs12691551	rs7533125	15907908	15883744	1.62584e-10	1.73535e-10	0.444263	-0.0657054	0.191164	-0.0129903	0.0067341	0.709814	FALSE
6	NT5E	ENSG00000135318	rs493441	rs9362203	86094567	86082738	8.13005e-20	1.4545e-19	0.0439932	-0.308542	0.0737324	-0.0141915	0.00814208	0.241927	FALSE
6	CCHCR1	ENSG00000204536	rs116344411	rs147985515	31111675	31174035	4.74911e-42	4.77806e-43	0.50415	0.307789	0.0462579	0.0143458	0.00874985	0.49196	FALSE
1	TRIT1	ENSG00000043514	rs6600301	rs3131691	40294186	40357268	2.42023e-18	1.51256e-16	0.00327632	-0.00205277	0.013564	0.0146015	0.00930658	0.619582	FALSE
6	HLA-DQB2	ENSG00000232629	rs74951723	rs114183935	32620916	32655730	1.13613e-11	3.31115e-09	0.208621	-0.00144716	0.218474	-0.0114316	0.00973644	0.794984	FALSE
1	GSTM4	ENSG00000168765	rs6669802	rs542338	110163076	110192766	3.01351e-26	4.80597e-31	0.120354	-0.531072	0.0385574	-0.0138798	0.0102285	0.565931	FALSE
14	CFL2	ENSG00000165410	rs11845502	rs8005490	35157959	35184541	4.26701e-23	4.20273e-24	0.47295	-0.18131	0.0718523	-0.013311	0.0104828	0.267986	FALSE
15	DMXL2	ENSG00000104093	rs2445750	rs9806214	51689195	51901923	4.56018e-10	4.64474e-10	0.0182043	-0.398688	0.0387197	-0.013645	0.0108886	0.111713	FALSE
17	HEATR6	ENSG00000068097	rs73318912	rs12946928	57951445	58187662	1.07239e-24	7.84331e-25	0.464679	-0.322276	0.0332271	-0.0129529	0.013388	0.191255	FALSE
7	C1GALT1	ENSG00000106392	rs11764290	rs1010366	7284591	7229826	1.17307e-14	1.24251e-10	0.0349531	0.424762	0.0466211	0.0125608	0.014188	0.197399	FALSE
19	GIPR	ENSG00000010310	rs1964272	rs8108269	46190268	46158513	7.73324e-21	6.35075e-21	0.0735912	0.324198	0.0124543	0.0129902	0.0142659	0.842067	FALSE
21	CCT8	ENSG00000156261	rs2249068	rs7283930	30281063	30461373	1.14272e-38	5.90317e-40	0.524003	-0.305959	0.0523305	-0.0121374	0.0156143	0.436125	FALSE
16	LMF1	ENSG00000103227	rs13334376	rs2729595	1021001	1027688	9.94138e-23	2.79983e-23	0.213692	-0.234652	0.0514085	-0.0120161	0.0161974	0.38771	FALSE
6	HLA-DQA2	ENSG00000237541	rs28366298	rs35179057	32560859	32523349	1.05573e-16	5.49651e-14	0.397435	0.00715827	0.269429	-0.00923382	0.0163168	0.582348	FALSE
17	USP6	ENSG00000129204	rs9890097	rs62072760	5277161	5097573	2.74937e-17	3.97841e-18	0.444175	-0.294634	0.00315184	-0.0124154	0.0171236	0.178747	FALSE
1	ZNHIT6	ENSG00000117174	rs4949915	rs2785082	86073045	86170061	6.29804e-18	6.56391e-18	0.107124	-0.566597	0.0738573	-0.0114307	0.0176348	0.765364	FALSE
17	ORMDL3	ENSG00000172057	rs3816470	rs8080546	37985801	38146966	4.25125e-11	4.19311e-11	0.673437	0.0535522	0.307111	0.00852611	0.0178072	0.132402	FALSE
12	IRAK3	ENSG00000090376	rs1436849	rs1152906	66575118	66627123	6.23959e-11	2.97339e-12	0.216162	-0.259269	0.0375407	-0.0113445	0.0204019	0.174583	FALSE
2	MFSD6	ENSG00000151690	rs4853513	rs10204628	191479455	191488854	3.24842e-11	1.56756e-19	0.372701	0.183803	0.189108	0.00940559	0.0214367	0.328307	FALSE
3	CCDC66	ENSG00000180376	rs35108861	rs9834064	56567175	56590069	5.56285e-17	3.35356e-16	0.422924	-0.353198	0.0339131	-0.0111373	0.0218406	0.392162	FALSE
17	AC091132.2	ENSG00000214425	rs116426939	rs242948	44189067	43913544	6.03485e-32	7.41178e-32	0.387323	0.295871	0.178	0.0092052	0.0238268	0.7385	FALSE
19	ZNF155	ENSG00000204920	rs384596	rs1233454	44490758	44741827	3.11216e-09	1.49581e-08	0.444602	0.274683	0.0555796	0.0105065	0.0242958	0.859159	FALSE
9	C9orf93	ENSG00000164989	rs9407659	rs770193	15835759	15862959	1.54845e-13	1.99311e-13	0.405535	0.327111	0.0497044	0.0104535	0.0251103	0.516281	FALSE
22	TTC38	ENSG00000075234	rs74638538	rs6008473	46729813	46674639	6.17387e-16	1.28598e-17	0.0177135	0.407974	0.0503042	0.0101678	0.0271452	0.77598	FALSE
5	DHFR	ENSG00000228716	rs2431221	rs245013	79934230	80047076	2.55802e-31	4.89662e-33	0.507968	0.191679	0.104361	0.00916518	0.0307899	0.291078	FALSE
15	HERC1	ENSG00000103657	rs116907180	rs58603603	63827136	64142608	8.04098e-25	9.87857e-25	0.103434	0.249328	0.00869916	0.0105226	0.0358951	0.222387	FALSE
2	COL5A2	ENSG00000204262	rs56284022	rs9677436	189798089	190268271	8.26061e-09	7.51249e-10	0.487201	-0.457403	0.00522536	0.00957639	0.036217	NA	FALSE
11	PIWIL4	ENSG00000134627	rs1271188	rs11020743	94340084	94074514	3.48141e-09	5.50566e-09	0.304575	-0.1687	0.0216638	-0.00928967	0.0375181	0.19298	FALSE
6	HLA-C	ENSG00000204525	rs112163059	rs114916097	31243846	31265314	5.12061e-13	7.00348e-13	0.168245	0.00325815	0.0974119	0.00837172	0.0398102	0.30705	FALSE
15	DIS3L	ENSG00000166938	rs61607967	rs6494558	66551460	66520931	1.0105e-30	2.78165e-31	0.358044	-0.411424	0.00492789	-0.00842742	0.0495352	0.363957	FALSE
2	SP140	ENSG00000079263	rs4973304	rs10203146	231111063	231185144	2.71719e-17	1.5329e-17	0.308741	0.150253	0.0117966	0.00823572	0.0513959	0.951463	FALSE
4	CRIPAK	ENSG00000179979	rs1064839	rs2279279	1019697	1164277	1.05491e-15	9.74178e-16	0.384027	-0.224683	0.0379637	-0.00775931	0.0553158	0.675128	FALSE
21	CCT8	ENSG00000156261	rs2245308	rs7283930	30355672	30461373	5.53851e-15	1.72068e-14	0.592695	0.265042	0.102833	0.00705422	0.0584841	0.274844	FALSE
6	HLA-DRB5	ENSG00000198502	rs141161232	rs145938181	32438387	32421010	5.41813e-42	5.42869e-42	0.463877	0.387496	0.0441708	0.00740808	0.060322	0.791544	FALSE
4	TLR6	ENSG00000174130	rs3821985	rs6834781	38830012	38758432	1.99798e-11	1.21895e-11	0.313296	-0.120796	0.0507808	-0.0071858	0.0633989	0.786837	FALSE
6	HLA-DQA1	ENSG00000196735	rs1766	rs9276807	32627795	32780156	5.64273e-11	6.1819e-11	0.206458	0.00599457	0.163763	0.00631961	0.0636276	0.620441	FALSE
2	C2orf63	ENSG00000162994	rs2920844	rs6738970	55341367	55513738	5.02292e-10	1.2938e-09	0.0703434	-0.339603	0.00252272	0.00708916	0.0720989	NA	FALSE
17	ARHGAP27	ENSG00000159314	rs111264366	rs148982040	43855603	43565690	3.26143e-09	1.72256e-09	0.43612	-0.0978632	0.0151902	-0.00685238	0.0751624	0.373455	FALSE
8	MTUS1	ENSG00000129422	rs35629252	rs118144328	17940008	17711253	6.9233e-23	3.01583e-24	0.00406181	0.290844	0.00742278	0.00675491	0.0784457	0.299656	FALSE
8	SAMD12	ENSG00000177570	rs1568484	rs2514589	119616401	119603222	2.78745e-14	1.97459e-11	0.472842	0.0466555	0.165649	-0.00560729	0.0803378	NA	FALSE
9	SLC31A1	ENSG00000136868	rs9696981	rs10817465	115918663	116005783	1.21029e-13	1.67189e-13	0.187946	-0.317304	0.0172292	-0.00616885	0.0910567	0.794277	FALSE
22	CECR5	ENSG00000069998	rs971768	rs3764847	17597462	17663117	2.63545e-15	1.53267e-15	0.351806	0.104199	0.0374931	0.00592954	0.094121	0.443194	FALSE
15	CATSPER2	ENSG00000166762	rs7169382	rs512431	44098173	43541939	1.8832e-09	1.40351e-09	0.364223	0.0983705	0.04445	0.00585617	0.0949805	0.7922	FALSE
7	NRCAM	ENSG00000091129	rs140178975	rs6976804	108235027	108092036	1.50145e-11	1.74691e-11	0.00373372	0.059902	0.00421476	0.00608861	0.0953657	0.104643	FALSE
5	ALDH7A1	ENSG00000164904	rs11958842	rs62391554	125963051	125937686	1.25135e-08	3.99136e-09	0.33983	-0.00345385	0.0924086	-0.00551424	0.0964231	NA	FALSE
16	TK2	ENSG00000166548	rs889527	rs94163	66921264	66512824	6.93866e-09	3.24499e-10	0.0892765	-0.00174319	0.0295156	0.00583384	0.0982122	NA	FALSE
11	ACY3	ENSG00000132744	rs7925892	rs6591268	67455739	67427159	3.16113e-11	2.07549e-11	0.403845	0.288472	0.000461429	0.00592652	0.100542	NA	FALSE
7	ZNF117	ENSG00000152926	rs149995189	rs34848990	64493338	64515446	6.76123e-23	2.36028e-23	0.150349	0.321402	7.13369e-05	0.00583455	0.103295	NA	FALSE
7	PVRIG	ENSG00000213413	rs1963304	rs66809776	99625796	99782124	1.75245e-09	2.00116e-10	0.0798237	-0.362377	0.017821	-0.00537725	0.114597	NA	FALSE
8	SAMD12	ENSG00000177570	rs2204033	rs2514589	119662688	119603222	4.65399e-09	1.05708e-08	0.642092	0.170855	0.170625	0.00445954	0.117896	NA	FALSE
15	DIS3L	ENSG00000166938	rs11631757	rs6494558	66524433	66520931	1.98803e-10	7.21363e-10	0.0334909	-0.00975031	0.022276	0.0051068	0.123299	0.0891145	FALSE
4	TMEM33	ENSG00000109133	rs16854020	rs71608101	42117559	42168329	4.99975e-11	3.86883e-11	0.00400903	0.124588	0.006419	0.00496562	0.131718	NA	FALSE
7	STYXL1	ENSG00000127952	rs6465038	rs11763339	75869192	75761541	1.74424e-16	2.17106e-17	0.00383167	0.261325	0.0664158	0.00465101	0.132332	NA	FALSE
8	SAMD12	ENSG00000177570	rs7004852	rs2514589	119526022	119603222	3.7058e-15	2.90365e-15	0.333647	-0.325744	0.0832857	-0.00453767	0.133583	NA	FALSE
10	ANKRD26	ENSG00000107890	rs111248695	rs67262546	27259828	27392568	2.6053e-10	1.6103e-11	0.0108359	0.0979466	0.00432998	0.00489942	0.134737	0.0863063	FALSE
9	NUDT2	ENSG00000164978	rs7028914	rs10972055	34284727	34318654	1.34244e-08	2.12097e-12	0.429109	0.00136363	0.490506	0.00248427	0.136529	0.902818	FALSE
6	HLA-DRB5	ENSG00000198502	rs150186655	rs145938181	32394184	32421010	1.44979e-14	1.27262e-14	0.00530007	-0.006118	0.0464113	-0.00441342	0.146936	0.890806	FALSE
20	CPNE1	ENSG00000214078	rs6579266	rs6058339	34537887	34460479	1.89082e-11	2.6038e-11	0.0291933	-0.590851	0.0629704	-0.00431109	0.148142	NA	FALSE
17	TMEM101	ENSG00000091947	rs9913925	rs1642595	42155838	42065227	2.63423e-15	1.14625e-15	0.435732	-0.308085	0.0233183	-0.00442999	0.151047	NA	FALSE
6	HLA-DRB5	ENSG00000198502	rs9269495	rs145938181	32543048	32421010	1.52123e-12	3.91382e-12	0.619623	0.21626	0.166422	0.00375063	0.152697	0.319318	FALSE
7	PILRB	ENSG00000121716	rs35474292	rs7798226	99988813	99987236	1.09241e-30	2.21408e-32	0.0158416	0.469964	0.0337247	0.00421651	0.159047	NA	FALSE
4	FAM53A	ENSG00000174137	rs2854918	rs7676700	1716693	1738129	6.75781e-22	8.56319e-22	0.551969	0.222699	0.134668	0.00377433	0.159141	NA	FALSE
22	FAM118A	ENSG00000100376	rs226492	rs35048184	45714489	45743085	1.0901e-20	3.24531e-21	0.47865	-0.221073	0.325682	0.00294011	0.159217	0.912257	FALSE
2	RPIA	ENSG00000153574	rs1581174	rs10084480	89022995	88962014	4.7143e-09	3.21363e-11	0.0141711	-0.0121243	0.0429075	-0.00389818	0.173684	0.928811	FALSE
18	HDHD2	ENSG00000167220	rs2684849	rs662397	44762592	44320836	1.36358e-12	5.20402e-13	0.474054	-0.146594	0.175626	-0.00327809	0.178878	NA	FALSE
1	TRIT1	ENSG00000043514	rs77164272	rs3131691	40296453	40357268	3.05528e-13	8.24467e-14	0.00807149	0.0183417	0.00448385	-0.00371767	0.192716	0.777148	FALSE
4	ANXA5	ENSG00000164111	rs6849954	rs6857766	122573255	122611285	2.41654e-12	4.98423e-11	0.0557133	0.209388	0.00328697	-0.0036057	0.199838	0.965215	FALSE
6	XXbac-BPG246D15.9	ENSG00000250264	rs141894154	rs9357155	32110583	32809848	7.96845e-11	7.8095e-11	0.0136752	0.110555	0.000618659	-0.00340696	0.213334	NA	FALSE
16	NPIP	ENSG00000183426	rs3844608	rs222118	15512575	15510600	2.16009e-15	4.92679e-15	0.326862	-0.349569	0.00181354	-0.00339362	0.21396	NA	FALSE
5	DHFR	ENSG00000228716	rs1222809	rs245013	79917517	80047076	1.53004e-16	4.75503e-16	0.352465	-0.00819849	0.182447	0.00277788	0.214094	0.455679	FALSE
7	PVRIG	ENSG00000213413	rs35474292	rs66809776	99988813	99782124	8.25364e-18	8.00643e-18	0.0394875	-0.327572	0.015578	-0.00334199	0.214291	NA	FALSE
9	PTPLAD2	ENSG00000188921	rs2150999	rs4399021	20790622	20691002	3.02038e-15	4.81765e-15	0.416894	0.250747	0.013216	-0.00330699	0.217263	NA	FALSE
4	TLR10	ENSG00000174123	rs3775073	rs5743614	38829832	38798935	6.71903e-26	2.0903e-25	0.273797	-0.199505	0.0748111	-0.00294739	0.229005	NA	FALSE
20	RBCK1	ENSG00000125826	rs6084326	rs6051726	380602	382627	1.91731e-08	1.75816e-08	0.310796	0.210312	0.00292482	0.00314306	0.231468	NA	FALSE
2	C2orf63	ENSG00000162994	rs66483070	rs6738970	55376609	55513738	4.72488e-09	6.9347e-09	0.533703	-0.16765	0.0392608	-0.00302315	0.231882	NA	FALSE
22	FAM118A	ENSG00000100376	rs998706	rs35048184	45735606	45743085	9.63167e-16	7.01339e-15	0.371988	0.0524992	0.0678465	-0.00260527	0.259906	0.709953	FALSE
11	ZNF195	ENSG00000005801	rs10766959	rs11026713	3377794	3379317	1.45722e-35	3.30803e-39	0.295083	-0.461528	0.0211753	-0.00264079	0.26835	NA	FALSE
2	COL5A2	ENSG00000204262	rs77731475	rs9677436	189140853	190268271	8.26327e-26	2.85995e-25	0.49354	-0.451844	0.0114483	-0.00266366	0.268653	NA	FALSE
6	C4A	ENSG00000244731	rs9271377	rs149778146	32587165	31840794	2.70973e-20	6.00468e-20	0.331855	0.23935	0.00891915	0.00255156	0.279596	NA	FALSE
16	TK2	ENSG00000166548	rs355922	rs94163	66735571	66512824	2.04455e-27	5.17497e-29	0.000918447	0.308361	0.039259	0.00231204	0.29588	NA	FALSE
2	MTIF2	ENSG00000085760	rs72795435	rs10188143	55233528	55505372	7.49408e-15	1.4386e-14	0.00347982	-0.108861	0.00143098	0.00239876	0.296315	NA	FALSE
9	NUDT2	ENSG00000164978	rs3753033	rs10972055	34381192	34318654	2.71975e-12	5.01999e-09	0.0322268	0.00621105	0.00851678	-0.00223571	0.311629	0.601219	FALSE
11	BSCL2	ENSG00000168000	rs1792909	rs72931336	61937545	62687336	1.67118e-09	8.26005e-09	0.0113611	0.22137	0.00819254	0.00220582	0.314968	NA	FALSE
14	KIAA1737	ENSG00000198894	rs158106	rs11627117	77559321	77467973	1.00885e-11	7.33989e-13	0.361983	0.127117	0.0580552	-0.00207056	0.317802	NA	FALSE
21	NDUFV3	ENSG00000160194	rs62215012	rs1893599	44275945	44333685	7.42999e-13	2.36933e-16	0.136199	0.000925351	0.00233605	0.00186655	0.356762	NA	FALSE
6	XXbac-BPG246D15.9	ENSG00000250264	rs115104877	rs9357155	32902583	32809848	6.23195e-09	1.43107e-09	0.0776644	-0.114527	0.000481222	-0.00179081	0.36716	NA	FALSE
12	DPY19L2	ENSG00000177990	rs7299722	rs7980949	64030113	64058641	9.84793e-22	4.19044e-28	0.198949	0.299246	0.00787269	-0.00160265	0.39186	NA	FALSE
4	CRIPAK	ENSG00000179979	rs6599280	rs2279279	1063818	1164277	4.23648e-16	1.81025e-16	0.0551388	-0.0143275	0.0237358	-0.00156222	0.394093	0.778158	FALSE
9	FGD3	ENSG00000127084	rs7024692	rs76859785	95794071	95629798	4.35314e-18	3.23471e-15	0.00131672	0.223905	0.00153701	0.00158563	0.395893	NA	FALSE
2	37500	ENSG00000168385	rs59384702	rs11690426	242195394	242333889	2.40614e-23	9.67112e-23	0.126418	0.28316	0.020359	0.00148866	0.406279	NA	FALSE
22	FAM118A	ENSG00000100376	rs9614462	rs35048184	45751231	45743085	8.12456e-19	2.50408e-13	0.303952	0.0239273	0.0696765	-0.00136492	0.414506	0.538603	FALSE
18	RPL17	ENSG00000215472	rs12955787	rs7242374	47030252	47043463	1.4922e-11	3.70595e-10	0.114303	-0.00162841	0.0070973	0.00145572	0.414668	NA	FALSE
4	SRP72	ENSG00000174780	rs2030364	rs9996593	57285909	57175316	1.45918e-14	5.01017e-15	0.460519	-0.268096	0.00113765	-0.00133372	0.436322	NA	FALSE
5	NUDT12	ENSG00000112874	rs114776461	rs10900868	102883166	102886246	2.04623e-09	4.72443e-10	0.0988786	0.00570063	0.00107092	0.00129345	0.443354	0.383721	FALSE
8	SAMD12	ENSG00000177570	rs72678183	rs2514589	119636507	119603222	2.84977e-17	3.43753e-22	0.234514	0.132895	0.0910057	0.00115207	0.448225	NA	FALSE
7	TRGV5	ENSG00000211697	rs28504113	rs7789008	38387992	38550286	6.71439e-10	2.34018e-09	0.175096	-0.0413149	0.0617747	-0.00116213	0.453426	0.662743	FALSE
1	ATF6	ENSG00000118217	rs1962509	rs12096504	161945467	161917749	2.14447e-10	3.35262e-10	0.255488	-0.165358	0.00699852	-0.00115829	0.466903	NA	FALSE
21	NDUFV3	ENSG00000160194	rs71320572	rs1893599	44333169	44333685	2.32369e-30	2.2529e-30	0.00877007	-0.355322	0.0064635	-0.00115129	0.468374	NA	FALSE
11	BSCL2	ENSG00000168000	rs61893734	rs72931336	61994157	62687336	3.19742e-09	5.66571e-10	0.272572	-0.043125	0.00949154	-0.00113801	0.470273	NA	FALSE
19	RPS28	ENSG00000233927	rs79728589	rs2972570	8396316	8381163	1.52208e-11	7.95937e-11	0.697435	0.0426951	0.0154018	-0.00109191	0.478095	NA	FALSE
12	DPY19L2	ENSG00000177990	rs7316001	rs7980949	63979105	64058641	1.63464e-08	1.24557e-08	0.0643291	-3.73722e-05	0.00851198	-0.00106704	0.484677	NA	FALSE
6	LRRC16A	ENSG00000079691	rs7762537	rs9295648	25334967	25186568	6.67066e-09	1.16823e-08	0.00767996	-0.196846	0.025642	-0.000966915	0.502212	NA	FALSE
11	SLC37A2	ENSG00000134955	rs12274497	rs12276292	124822296	124946817	1.37438e-09	1.63288e-09	0.0155786	0.112415	0.0363342	0.000928688	0.508453	NA	FALSE
16	CPNE7	ENSG00000178773	rs11640198	rs12445225	89807785	89741790	3.90163e-15	2.50917e-15	0.122406	0.202067	0.0013814	0.000950958	0.510979	0.958421	FALSE
13	SLAIN1	ENSG00000139737	rs116115922	rs1279442	78665230	78292340	1.00927e-17	1.38684e-18	0.0132398	0.239139	0.00154359	-0.000864574	0.530799	NA	FALSE
4	MED28	ENSG00000118579	rs2110496	rs3796812	18279302	17582051	5.22388e-12	1.46695e-10	0.172336	0.298741	0.0654303	-0.000792425	0.535105	NA	FALSE
2	NDUFA10	ENSG00000130414	rs4854059	rs720772	240914952	240936725	1.56032e-27	1.88747e-31	0.246904	0.455582	0.00474742	0.000795448	0.547065	NA	FALSE
11	SLC37A2	ENSG00000134955	rs11605560	rs12276292	124953079	124946817	1.06378e-08	3.12892e-09	0.155423	-0.157522	0.0262388	-0.000737037	0.557883	NA	FALSE
3	PARP14	ENSG00000173193	rs4048549	rs9875741	122471831	122607800	5.82065e-14	3.40833e-14	0.396113	-0.302262	0.0272584	-0.000677261	0.57411	NA	FALSE
2	PRKD3	ENSG00000115825	rs114489980	rs6751012	38443678	37556864	1.11105e-08	7.19328e-09	0.00354196	-0.0434715	0.0215938	0.000677347	0.575196	0.687669	FALSE
7	ZNF117	ENSG00000152926	rs78725386	rs34848990	64841027	64515446	1.83974e-12	6.19714e-12	0.179006	-0.204536	0.0206025	-0.000674393	0.576224	NA	FALSE
6	MTRF1L	ENSG00000112031	rs7770478	rs9397575	153277783	153321485	4.27949e-27	4.29536e-27	0.518957	0.217306	0.00725119	-0.000676291	0.578268	NA	FALSE
15	C15orf57	ENSG00000128891	rs4924499	rs8026605	41005641	40875584	6.71815e-11	8.06094e-17	0.346501	-0.263112	0.117317	0.000596476	0.5798	NA	FALSE
6	HLA-DRB1	ENSG00000196126	rs114100277	rs115072738	32438542	32402778	1.29147e-09	2.12168e-10	0.605109	0.0594006	0.335917	0.000435014	0.585664	NA	FALSE
1	CTSS	ENSG00000163131	rs56174820	rs7530922	150614966	150023407	1.61169e-11	4.77121e-12	0.091985	-0.121523	0.0146425	-0.000596498	0.600253	NA	FALSE
18	RPL17	ENSG00000215472	rs12958032	rs7242374	47027023	47043463	1.03224e-23	2.96502e-25	0.065077	0.321095	0.00637695	0.000599819	0.600763	NA	FALSE
12	PRKAB1	ENSG00000111725	rs9668711	rs10849690	120066327	120114205	3.5376e-13	9.45451e-14	0.28288	-0.340216	0.00761108	-0.000588313	0.604053	NA	FALSE
4	N4BP2	ENSG00000078177	rs421631	rs10033364	39820563	40041816	1.64628e-11	1.5055e-12	0.445718	-0.14459	0.0452237	0.000530037	0.615791	NA	FALSE
16	NLRC3	ENSG00000167984	rs8050566	rs7190673	3611610	3665303	8.31461e-18	1.51933e-20	0.192169	-0.297307	0.00782739	0.000546633	0.61713	NA	FALSE
20	ZNF337	ENSG00000130684	rs67920646	rs6138608	25248744	25567320	8.41787e-19	9.11136e-19	0.403986	0.269883	0.035464	0.000524446	0.619445	NA	FALSE
21	NDUFV3	ENSG00000160194	rs383789	rs1893599	44367101	44333685	1.38281e-11	9.54426e-09	0.423169	0.170942	0.00589287	0.00051915	0.62646	NA	FALSE
1	HOOK1	ENSG00000134709	rs11572215	rs11572285	60387244	60372721	1.34617e-14	1.9137e-15	0.012652	-0.0101168	0.00621018	-0.000422621	0.660516	0.970664	FALSE
3	FAM55C	ENSG00000144815	rs348886	rs4289325	100900593	101363502	9.85401e-18	5.48028e-19	0.358119	0.309353	0.0109775	-0.000395015	0.670375	NA	FALSE
16	NLRC3	ENSG00000167984	rs9923287	rs7190673	3633856	3665303	6.3995e-09	3.8642e-09	0.0171471	0.0112981	0.00558187	0.000396819	0.670512	NA	FALSE
5	ALDH7A1	ENSG00000164904	rs7720420	rs62391554	125974045	125937686	1.45422e-18	4.64592e-24	0.0170732	0.286342	0.11057	-0.000336394	0.678736	NA	FALSE
1	GSTM4	ENSG00000168765	rs503558	rs542338	110100913	110192766	3.88524e-14	2.7192e-10	0.214749	0.0407177	0.0186599	0.000331081	0.69566	0.909939	FALSE
2	MFSD6	ENSG00000151690	rs4853507	rs10204628	191282429	191488854	1.77072e-09	6.44666e-14	0.53043	0.0741595	0.220912	0.000260746	0.696818	0.819133	FALSE
6	HLA-DQB2	ENSG00000232629	rs112969173	rs114183935	32583919	32655730	2.6816e-16	1.88314e-16	0.161374	-0.00288712	0.0519257	0.000298375	0.705565	0.499663	FALSE
6	MDC1	ENSG00000137337	rs116024646	rs116714571	31453547	30783282	5.69985e-12	9.5956e-13	0.29464	0.193301	0.00539083	0.000306777	0.708381	NA	FALSE
7	VPS41	ENSG00000006715	rs3801129	rs1017028	38887024	38802617	1.61745e-25	1.79648e-26	0.462397	0.244529	0.00108604	-0.000303765	0.710349	NA	FALSE
22	RRP7A	ENSG00000189306	rs117213647	rs137100	42879503	42990074	1.15557e-08	7.33764e-09	0.257731	-0.126596	0.0010334	-0.000303041	0.710686	NA	FALSE
6	C4A	ENSG00000244731	rs116403198	rs149778146	32187721	31840794	5.61412e-10	2.93358e-09	0.373114	0.239489	0.00293205	-0.000297735	0.712857	NA	FALSE
9	PTCH1	ENSG00000185920	rs10761388	rs28504650	98171401	98257842	4.10907e-13	1.07944e-18	0.208123	-0.202345	0.00579182	-0.000288789	0.716627	NA	FALSE
14	C14orf159	ENSG00000133943	rs149918169	rs10083403	91596804	91672575	2.02161e-13	1.30419e-13	0.00823447	0.143932	0.00389468	-0.000250248	0.735696	NA	FALSE
2	ROCK2	ENSG00000134318	rs6432189	rs10208872	11511411	11490420	1.5428e-21	3.01981e-21	0.405732	-0.268405	0.00267733	-0.000237588	0.742377	NA	FALSE
4	SRP72	ENSG00000174780	rs13123301	rs9996593	57257227	57175316	7.51698e-11	1.37495e-10	0.132274	0.00112318	3.4337e-06	0.000237151	0.742938	NA	FALSE
6	HLA-DQA2	ENSG00000237541	rs12055445	rs35179057	32626739	32523349	1.43137e-09	7.0336e-09	0.106348	0.0081614	0.0229926	-0.000213349	0.752983	0.877921	FALSE
1	NTNG1	ENSG00000162631	rs2203911	rs1730871	107439019	107636845	4.43084e-15	3.16884e-15	0.360103	-0.214081	0.0280465	-0.00011526	0.816608	0.864913	FALSE
2	COL5A2	ENSG00000204262	rs1469967	rs9677436	190404237	190268271	9.7963e-21	1.54642e-20	0.485724	-0.444561	0.00542295	-0.000117561	0.8169	NA	FALSE
6	HLA-DQA2	ENSG00000237541	rs9273394	rs35179057	32627082	32523349	5.59578e-13	7.16784e-13	0.356997	-0.0744162	0.137828	7.05618e-05	0.847227	0.0566151	FALSE
6	HLA-DRB1	ENSG00000196126	rs28383461	rs115072738	32609607	32402778	2.71124e-13	2.74064e-13	0.544467	0.0636532	0.199249	6.41742e-05	0.848803	NA	FALSE
3	PARP14	ENSG00000173193	rs79229868	rs9875741	122425843	122607800	8.74297e-09	1.42171e-08	0.0570809	-0.0595916	0.00396706	-6.40991e-05	0.864351	NA	FALSE
15	C15orf57	ENSG00000128891	rs2619681	rs8026605	40989021	40875584	3.96678e-27	8.17164e-27	0.212652	-0.420055	0.117315	4.98796e-05	0.872813	NA	FALSE
17	GJC1	ENSG00000182963	rs138778546	rs9909285	42901466	42898957	1.15326e-09	2.30585e-10	0.00454465	-2.60215e-05	0.0129726	-4.5811e-05	0.884646	0.415778	FALSE
7	MACC1	ENSG00000183742	rs77423873	rs2041017	20294261	20280329	1.30898e-24	1.42444e-24	0.00155242	-0.253725	0.00241992	4.09156e-05	0.891518	NA	FALSE
18	CEP192	ENSG00000101639	rs576144	rs562151	13094801	13066123	7.61848e-11	2.92878e-17	0.556029	0.105729	0.0301729	-3.52964e-05	0.897775	NA	FALSE
17	GJC1	ENSG00000182963	rs3024295	rs9909285	43039598	42898957	4.41768e-14	8.22396e-17	0.109012	0.0738657	0.00968566	-1.39608e-05	0.936271	0.545062	FALSE
11	PAAF1	ENSG00000175575	rs586773	rs61902362	73696610	73877090	1.16949e-11	3.04229e-12	0.048908	-0.167785	0.0260896	-1.20908e-05	0.940188	NA	FALSE
1	HMGN2	ENSG00000198830	rs11247936	rs6668958	26698884	26902388	5.05093e-18	6.28966e-18	0.00727439	0.24563	0.000574106	1.10618e-05	0.943519	NA	FALSE
3	CD47	ENSG00000196776	rs6768207	rs9810815	108024901	108061929	1.69534e-19	4.22637e-21	0.518033	0.375608	0.049764	-3.80738e-06	0.965999	NA	FALSE
18	CEP192	ENSG00000101639	rs486498	rs562151	12481489	13066123	4.73543e-16	1.8141e-11	0.22324	-0.284581	0.0302404	-2.2766e-06	0.973971	NA	FALSE
7	MACC1	ENSG00000183742	rs77597158	rs2041017	20291790	20280329	1.68241e-08	6.31536e-09	0.00457009	-0.260605	0.00762815	4.81459e-07	0.988165	NA	FALSE
16	TK2	ENSG00000166548	rs150369207	rs94163	67572934	66512824	4.11032e-09	1.15632e-08	0.0709738	0.0295923	0.0290176	-1.9731e-07	0.992341	NA	FALSE
16	RP11-419C5.2	ENSG00000226232	rs5014388	16-70011854	70057868	70011854	4.39465e-10	1.39287e-10	0.2972	0.190972	NA	NA	NA	NA	NA
1	ZNHIT6	ENSG00000117174	rs1980927	rs2785082	86070618	86170061	1.35408e-17	7.77892e-18	0.38854	-0.170603	NA	NA	NA	NA	NA
6	MDGA1	ENSG00000112139	rs6938061	6-37682839	37674339	37682839	1.45305e-23	3.23365e-19	0.0850529	-0.678945	NA	NA	NA	NA	NA
12	RDH5	ENSG00000135437	rs941022	12-56084676	56111324	56084676	4.30637e-13	5.84468e-13	0.0952483	0.175605	NA	NA	NA	NA	NA
22	GSTT1	ENSG00000184674	rs2097433	rs762283	24296894	24943582	2.14776e-10	4.11516e-10	0.650423	-0.0751625	NA	NA	NA	NA	NA
10	SFXN2	ENSG00000156398	rs2244524	10-104528175	104486974	104528175	6.20933e-18	3.43928e-19	0.0212462	-0.312913	NA	NA	NA	NA	NA
10	SFXN2	ENSG00000156398	rs7068910	10-104528175	104515850	104528175	8.32221e-11	7.36527e-12	0.0434637	-0.00116426	NA	NA	NA	NA	NA
20	HSPA12B	ENSG00000132622	rs502492	rs62206555	3710659	3730524	3.69673e-36	5.8551e-36	0.00294782	0.376543	NA	NA	NA	NA	NA
6	HLA-DRB5	ENSG00000198502	rs115408537	rs145938181	32166380	32421010	3.25244e-12	3.0682e-12	0.00896748	-0.00882347	NA	NA	NA	NA	NA
5	GALNT10	ENSG00000164574	rs10463257	5-153665948	153718007	153665948	5.55446e-14	4.16076e-14	0.368754	-0.187113	NA	NA	NA	NA	NA

## Sheet: Supplementary File 1C
Supplementary Table 3: Proportion of the contribution of cis variants, trans variants, interactions between the two and unique environment to variation in gene expression.
		Variance explained
Ensembl ID	in cis	in trans	by cis-trans	Unique
			epistasis	environment
ENSG00000135046	0.008992	0.067141	0.556484	0.367383
ENSG00000035664	0.007403	0.053648	0.421453	0.517496
ENSG00000164056	0.0065	0.160918	0.31248	0.520102
ENSG00000179455	0.008858	0.073367	0.276516	0.641259
ENSG00000164715	0.00868	0.097225	0.24766	0.646435
ENSG00000132749	0.008397	0.116172	0.244017	0.631414
ENSG00000165434	0.008624	0.197781	0.239607	0.553988
ENSG00000171227	0.006945	0.461436	0.216523	0.315096
ENSG00000153317	0.009235	0.278739	0.174869	0.537157
ENSG00000135838	0.008846	0.112137	0.170688	0.708329
ENSG00000153815	0.008707	0.239755	0.166927	0.584611
ENSG00000133065	0.008784	0.42152	0.157501	0.412195
ENSG00000130518	0.008476	0.132955	0.144023	0.714546
ENSG00000179119	0.007638	0.439117	0.129732	0.423513
ENSG00000184860	0.003029	0.228053	0.101086	0.667832
ENSG00000129422	0.008172	0.557095	0.040205	0.394528
ENSG00000179588	0.008407	0.122346	0.038659	0.830588
ENSG00000164989	0.007761	0.203652	0.027807	0.76078
ENSG00000164307	0.87453	0	0.014823	0.110647
ENSG00000138172	0.352408	0	0.013921	0.633671
ENSG00000135912	0.478718	0.005535	0.013278	0.502469
ENSG00000107679	0.557056	0	0.011977	0.430967
ENSG00000106484	0.716587	0.013974	0.011778	0.257661
ENSG00000108559	0.370233	0.253664	0.011581	0.364522
ENSG00000101158	0.743424	0	0.011571	0.245005
ENSG00000133574	0.48004	0.264492	0.011164	0.244304
ENSG00000116771	0.560718	0	0.011152	0.42813
ENSG00000130477	0.551562	0	0.011079	0.437359
ENSG00000205795	0.546403	0	0.010849	0.442748
ENSG00000138744	0.761103	0.003848	0.010844	0.224205
ENSG00000173193	0.665956	0.088134	0.010721	0.235189
ENSG00000204920	0.55982	0	0.01065	0.42953
ENSG00000176531	0.480358	0.017803	0.010578	0.491261
ENSG00000115825	0.663366	0	0.010483	0.326151
ENSG00000214078	0.805833	0.018885	0.010469	0.164813
ENSG00000128039	0.381947	0.303138	0.010413	0.304502
ENSG00000154767	0.680388	0.098976	0.010026	0.21061
ENSG00000105928	0.783312	0.001182	0.010001	0.205505
ENSG00000168268	0.731205	0	0.009969	0.258826
ENSG00000136573	0.776334	0	0.009916	0.21375
ENSG00000100368	0.448186	0.320358	0.009913	0.221543
ENSG00000118217	0.264315	0	0.009897	0.725788
ENSG00000163814	0.660011	0.169313	0.009846	0.16083
ENSG00000136371	0.734964	0	0.009844	0.255192
ENSG00000137225	0.461948	0.063728	0.009793	0.464531
ENSG00000184674	0.640957	0.20634	0.00979	0.142913
ENSG00000043514	0.681085	0.075649	0.009764	0.233502
ENSG00000163131	0.453997	0.354114	0.009747	0.182142
ENSG00000166548	0.436809	0	0.009728	0.553463
ENSG00000005436	0.188266	0.164503	0.009727	0.637504
ENSG00000128928	0.779706	0	0.009643	0.210651
ENSG00000135318	0.747176	0.057572	0.009617	0.185635
ENSG00000179698	0.644241	0	0.009599	0.34616
ENSG00000021355	0.74783	0.049539	0.009579	0.193052
ENSG00000198830	0.447818	0.05836	0.009514	0.484308
ENSG00000196821	0.452369	0.143917	0.009459	0.394255
ENSG00000110455	0.762954	0.076175	0.009455	0.151416
ENSG00000156261	0.6406	0	0.009453	0.349947
ENSG00000090376	0.653084	0	0.009434	0.337482
ENSG00000176222	0.253163	0.354733	0.009414	0.38269
ENSG00000104093	0.673764	0	0.009395	0.316841
ENSG00000166928	0.357459	0	0.009373	0.633168
ENSG00000117174	0.545825	0.060987	0.009325	0.383863
ENSG00000048462	0.070233	0.11952	0.009283	0.800964
ENSG00000196743	0.676283	0	0.009281	0.314436
ENSG00000159228	0.528528	0.127629	0.00928	0.334563
ENSG00000146535	0.685747	0.168441	0.009264	0.136548
ENSG00000196689	0.534049	0	0.009263	0.456688
ENSG00000198369	0.052728	0.509128	0.009252	0.428892
ENSG00000204536	0.784184	0.060223	0.009242	0.146351
ENSG00000152926	0.251397	0.282357	0.009163	0.457083
ENSG00000112378	0.069532	0	0.009115	0.921353
ENSG00000109133	0.388324	0.07319	0.009104	0.529382
ENSG00000134256	0.274405	0.323555	0.009099	0.392941
ENSG00000137310	0.78096	0	0.009099	0.209941
ENSG00000103037	0.337096	0	0.009098	0.653806
ENSG00000025772	0.582541	0.030166	0.009089	0.378204
ENSG00000178878	0.660994	0	0.009081	0.329925
ENSG00000100505	0.382857	0.222355	0.009074	0.385714
ENSG00000148296	0.471134	0.321678	0.009064	0.198124
ENSG00000132622	0.281397	0.089485	0.009047	0.620071
ENSG00000139629	0.28837	0.266293	0.009043	0.436294
ENSG00000059758	0.186489	0.339951	0.009036	0.464524
ENSG00000139998	0.645051	0.06142	0.009035	0.284494
ENSG00000120594	0.726096	0	0.009015	0.264889
ENSG00000123395	0.283225	0.440564	0.009009	0.267202
ENSG00000196372	0.44884	0.311339	0.008993	0.230828
ENSG00000112874	0.768521	0	0.008992	0.222487
ENSG00000184117	0.476603	0.125649	0.008981	0.388767
ENSG00000046604	0.478857	0.2093	0.008976	0.302867
ENSG00000126003	0.084174	0.097449	0.00896	0.809417
ENSG00000088682	0.187384	0.122125	0.008954	0.681537
ENSG00000177432	0.162667	0.167619	0.008943	0.660771
ENSG00000185920	0.466919	0.082847	0.008928	0.441306
ENSG00000130590	0.581091	0.155983	0.008915	0.254011
ENSG00000165476	0.06717	0.29044	0.008904	0.633486
ENSG00000174137	0.626185	0	0.008845	0.36497
ENSG00000134318	0.453063	0.121981	0.008816	0.41614
ENSG00000153283	0.366778	0.111956	0.008815	0.512451
ENSG00000135437	0.646741	0	0.008814	0.344445
ENSG00000163430	0.166273	0.119675	0.008801	0.705251
ENSG00000204472	0.576803	0.111409	0.008761	0.303027
ENSG00000120896	0.162413	0.455735	0.008754	0.373098
ENSG00000113716	0.277754	0.459469	0.008742	0.254035
ENSG00000018699	0.470615	0.107052	0.008719	0.413614
ENSG00000140030	0.514254	0.014533	0.00871	0.462503
ENSG00000214087	0.74704	0	0.008708	0.244252
ENSG00000174236	0.257494	0.191948	0.008706	0.541852
ENSG00000091947	0.362508	0.154455	0.008702	0.474335
ENSG00000151690	0.642924	0.049395	0.008672	0.299009
ENSG00000164111	0.743936	0	0.008665	0.247399
ENSG00000166454	0.054158	0.215728	0.008664	0.72145
ENSG00000141524	0.541512	0.260927	0.008656	0.188905
ENSG00000170542	0.720424	0	0.008617	0.270959
ENSG00000204252	0.46297	0.264392	0.008605	0.264033
ENSG00000137337	0.252265	0.10312	0.008588	0.636027
ENSG00000111725	0.468116	0.199825	0.008564	0.323495
ENSG00000143919	0.219469	0	0.008559	0.771972
ENSG00000163704	0.05975	0.305007	0.008555	0.626688
ENSG00000132744	0.174884	0.477716	0.008539	0.338861
ENSG00000138336	0.043996	0.374979	0.008529	0.572496
ENSG00000215193	0.276715	0.315503	0.00852	0.399262
ENSG00000196793	0.462197	0.260964	0.008465	0.268374
ENSG00000174837	0.643679	0.021188	0.00845	0.326683
ENSG00000153574	0.46289	0.122507	0.008422	0.406181
ENSG00000178773	0.447358	0.353853	0.008388	0.190401
ENSG00000175575	0.446839	0.051656	0.008374	0.493131
ENSG00000204248	0.055454	0.213273	0.008365	0.722908
ENSG00000147439	0.060268	0.549898	0.008322	0.381512
ENSG00000188620	0.243851	0.158994	0.008315	0.58884
ENSG00000069998	0.273415	0.495413	0.0083	0.222872
ENSG00000180914	0.636195	0.136531	0.008296	0.218978
ENSG00000169116	0.191293	0.442533	0.008296	0.357878
ENSG00000146094	0.342539	0.200359	0.008274	0.448828
ENSG00000156398	0.548592	0.20201	0.008245	0.241153
ENSG00000171466	0.16309	0.105155	0.008233	0.723522
ENSG00000213413	0.623793	0.09652	0.008226	0.271461
ENSG00000105767	0.033222	0	0.008222	0.958556
ENSG00000106462	0.138504	0.410369	0.008195	0.442932
ENSG00000134709	0.435935	0.09095	0.008171	0.464944
ENSG00000055732	0.462844	0.029088	0.008152	0.499916
ENSG00000151640	0.75969	0.134209	0.008142	0.097959
ENSG00000078081	0.432681	0.212933	0.00807	0.346316
ENSG00000198894	0.619805	0	0.008069	0.372126
ENSG00000134901	0.179869	0.023064	0.008011	0.789056
ENSG00000204516	0.330613	0.287157	0.008004	0.374226
ENSG00000167984	0.434152	0.125356	0.007994	0.432498
ENSG00000138685	0.629437	0.023366	0.007985	0.339212
ENSG00000068097	0.530956	0.063614	0.007983	0.397447
ENSG00000173621	0.424189	0.144358	0.007863	0.42359
ENSG00000120087	0.227343	0.038595	0.00786	0.726202
ENSG00000144118	0.62253	0.191834	0.007808	0.177828
ENSG00000169245	0.521351	0.035181	0.0078	0.435668
ENSG00000165171	0.128722	0.489634	0.007786	0.373858
ENSG00000137210	0.231325	0.287751	0.007763	0.473161
ENSG00000106392	0.533148	0.174014	0.007762	0.285076
ENSG00000010310	0.456855	0.169477	0.007754	0.365914
ENSG00000182963	0.831108	0	0.00775	0.161142
ENSG00000197818	0.318338	0.188557	0.007731	0.485374
ENSG00000130508	0.427526	0.159347	0.007702	0.405425
ENSG00000163219	0.238831	0.21966	0.007605	0.533904
ENSG00000170396	0.029799	0.428509	0.007583	0.534109
ENSG00000134202	0.525413	0.231121	0.007581	0.235885
ENSG00000108883	0.330402	0.387902	0.007565	0.274131
ENSG00000112139	0.843335	0.024027	0.007514	0.125124
ENSG00000049656	0.238189	0	0.007375	0.754436
ENSG00000164543	0.417778	0.170958	0.007373	0.403891
ENSG00000142686	0.419753	0.195507	0.007371	0.377369
ENSG00000119917	0.224189	0.279712	0.0073	0.488799
ENSG00000198805	0.613619	0.235043	0.007299	0.144039
ENSG00000134627	0.611751	0	0.007195	0.381054
ENSG00000172057	0.841333	0	0.007171	0.151496
ENSG00000164403	0.319211	0.241573	0.007087	0.432129
ENSG00000130193	0.220007	0.490727	0.007082	0.282184
ENSG00000109618	0.216848	0.221507	0.006998	0.554647
ENSG00000113269	0.317305	0.288564	0.006964	0.387167
ENSG00000179979	0.612482	0.112527	0.006922	0.268069
ENSG00000108592	0.817877	0	0.006894	0.175229
ENSG00000013288	0.605983	0	0.006894	0.387123
ENSG00000107719	0.713502	0.06606	0.006877	0.213561
ENSG00000186111	0.611927	0.13707	0.006776	0.244227
ENSG00000174130	0.70817	0.056481	0.006768	0.228581
ENSG00000132382	0.017952	0.688992	0.006756	0.2863
ENSG00000157680	0.313177	0.30468	0.006752	0.375391
ENSG00000135698	0.315385	0.270178	0.006729	0.407708
ENSG00000168405	0.710774	0.05087	0.006724	0.231632
ENSG00000056661	0.811794	0	0.006693	0.181513
ENSG00000181061	0.016195	0.222387	0.006574	0.754844
ENSG00000161265	0.313861	0.334898	0.006573	0.344668
ENSG00000130684	0.21398	0.55679	0.006395	0.222835
ENSG00000214338	0.113726	0.399201	0.00638	0.480693
ENSG00000167220	0.21619	0.376233	0.006308	0.401269
ENSG00000144815	0.413219	0.251879	0.006307	0.328595
ENSG00000203760	0.211427	0.360637	0.006279	0.421657
ENSG00000144843	0.110811	0.395603	0.006211	0.487375
ENSG00000159128	0.309051	0.216591	0.006028	0.46833
ENSG00000165997	0.508002	0.069063	0.005994	0.416941
ENSG00000164484	0.702723	0.108772	0.005941	0.182564
ENSG00000101290	0.408332	0.04274	0.005906	0.543022
ENSG00000162542	0.107876	0.532692	0.005771	0.353661
ENSG00000128829	0.206589	0.321594	0.005763	0.466054
ENSG00000139263	0.210892	0	0.005747	0.783361
ENSG00000100221	0.506464	0.142023	0.005671	0.345842
ENSG00000118579	0.505662	0.12594	0.005598	0.3628
ENSG00000115866	0.007445	0.582862	0.005471	0.404222
ENSG00000197747	0.602874	0.097691	0.005354	0.294081
ENSG00000122335	0.305341	0.184061	0.00531	0.505288
ENSG00000189306	0.799155	0	0.00513	0.195715
ENSG00000103657	0.700475	0	0.0051	0.294425
ENSG00000137285	0.403443	0.17907	0.005012	0.412475
ENSG00000065308	0.699904	0.015254	0.00494	0.279902
ENSG00000100483	0.204348	0.264499	0.004933	0.52622
ENSG00000138346	0.104165	0.496442	0.004744	0.394649
ENSG00000183742	0.303037	0.262963	0.004616	0.429384
ENSG00000171989	0.103496	0	0.004401	0.892103
ENSG00000177570	0.500861	0.275337	0.00436	0.219442
ENSG00000185163	0.500666	0.224856	0.004227	0.270251
ENSG00000106789	0.60017	0	0.004173	0.395657
ENSG00000130414	0.597965	0.127316	0.003883	0.270836
ENSG00000078177	0.398799	0.333974	0.002933	0.264294
ENSG00000146830	0.200036	0.554479	0.002593	0.242892
ENSG00000165832	0.200176	0.56857	0.002534	0.22872
ENSG00000171984	0.00074	0.430752	0.002523	0.565985
ENSG00000064886	0.897825	0	0.002416	0.099759
ENSG00000105499	0.896487	0	0.0022	0.101313
ENSG00000159958	0.597693	0	0.001988	0.400319
ENSG00000183722	0.597464	0	0.000987	0.401549
ENSG00000174123	0.69661	0.02552	0.00038	0.27749
ENSG00000196151	0.099966	0.352934	0.000286	0.546814
ENSG00000100376	0.695254	0.14567	8.4e-05	0.158992
ENSG00000166793	0.497594	0.092868	2.7e-05	0.409511
ENSG00000182446	0.596639	0.223979	6e-06	0.179376
ENSG00000171298	0.698157	0.168205	1e-06	0.133637
ENSG00000177374	0	0.152571	0	0.847429
ENSG00000197894	0	0.482424	0	0.517576
ENSG00000104388	0	0.43547	0	0.56453
ENSG00000165494	0	0.612464	0	0.387536
ENSG00000189046	0	0.449883	0	0.550117
ENSG00000085760	0	0.427928	0	0.572072
ENSG00000120903	0	0.179574	0	0.820426
ENSG00000143674	0	0.411485	0	0.588515
ENSG00000168434	0	0.537314	0	0.462686
ENSG00000103978	0	0.441023	0	0.558977
ENSG00000135457	0	0.415731	0	0.584269
ENSG00000106819	0	0.012436	0	0.987564
ENSG00000111790	0	0.727346	0	0.272654
ENSG00000173281	0	0.461898	0	0.538102
ENSG00000124120	0	0.320146	0	0.679854
ENSG00000105298	0	0.694649	0	0.305351
ENSG00000204815	0	0	0	1
ENSG00000171865	0	0	0	1
ENSG00000164187	0	0.266931	0	0.733069
ENSG00000149313	0	0.747971	0	0.252029
ENSG00000115109	0	0.593491	0	0.406509
ENSG00000205937	0	0.624672	0	0.375328
ENSG00000131061	0	0.14543	0	0.85457
ENSG00000168000	0	0.374318	0	0.625682
ENSG00000161904	0	0.641413	0	0.358587
ENSG00000116273	0	0.726701	0	0.273299
ENSG00000149212	0	0.638673	0	0.361327
ENSG00000107821	0	0.291483	0	0.708517
ENSG00000144554	0	0.635862	0	0.364138
ENSG00000204389	0	0.499704	0	0.500296
ENSG00000204262	0	0.09338	0	0.90662
ENSG00000163257	0	0.487015	0	0.512985
ENSG00000196155	0	0.174209	0	0.825791
ENSG00000176619	0	0.806449	0	0.193551
ENSG00000105643	0	0.562713	0	0.437287
ENSG00000118193	0	0.629194	0	0.370806
ENSG00000172009	0	0.754381	0	0.245619
ENSG00000132793	0	0.232947	0	0.767053
ENSG00000099783	0	0.666417	0	0.333583
ENSG00000128915	0	0.638966	0	0.361034
