# Supplementary figures and images for: Genetic interactions affecting human gene expression identified by variance association mapping
Source: eLife journal article supplement (doi:10.7554/elife.01381), 2014-04-25

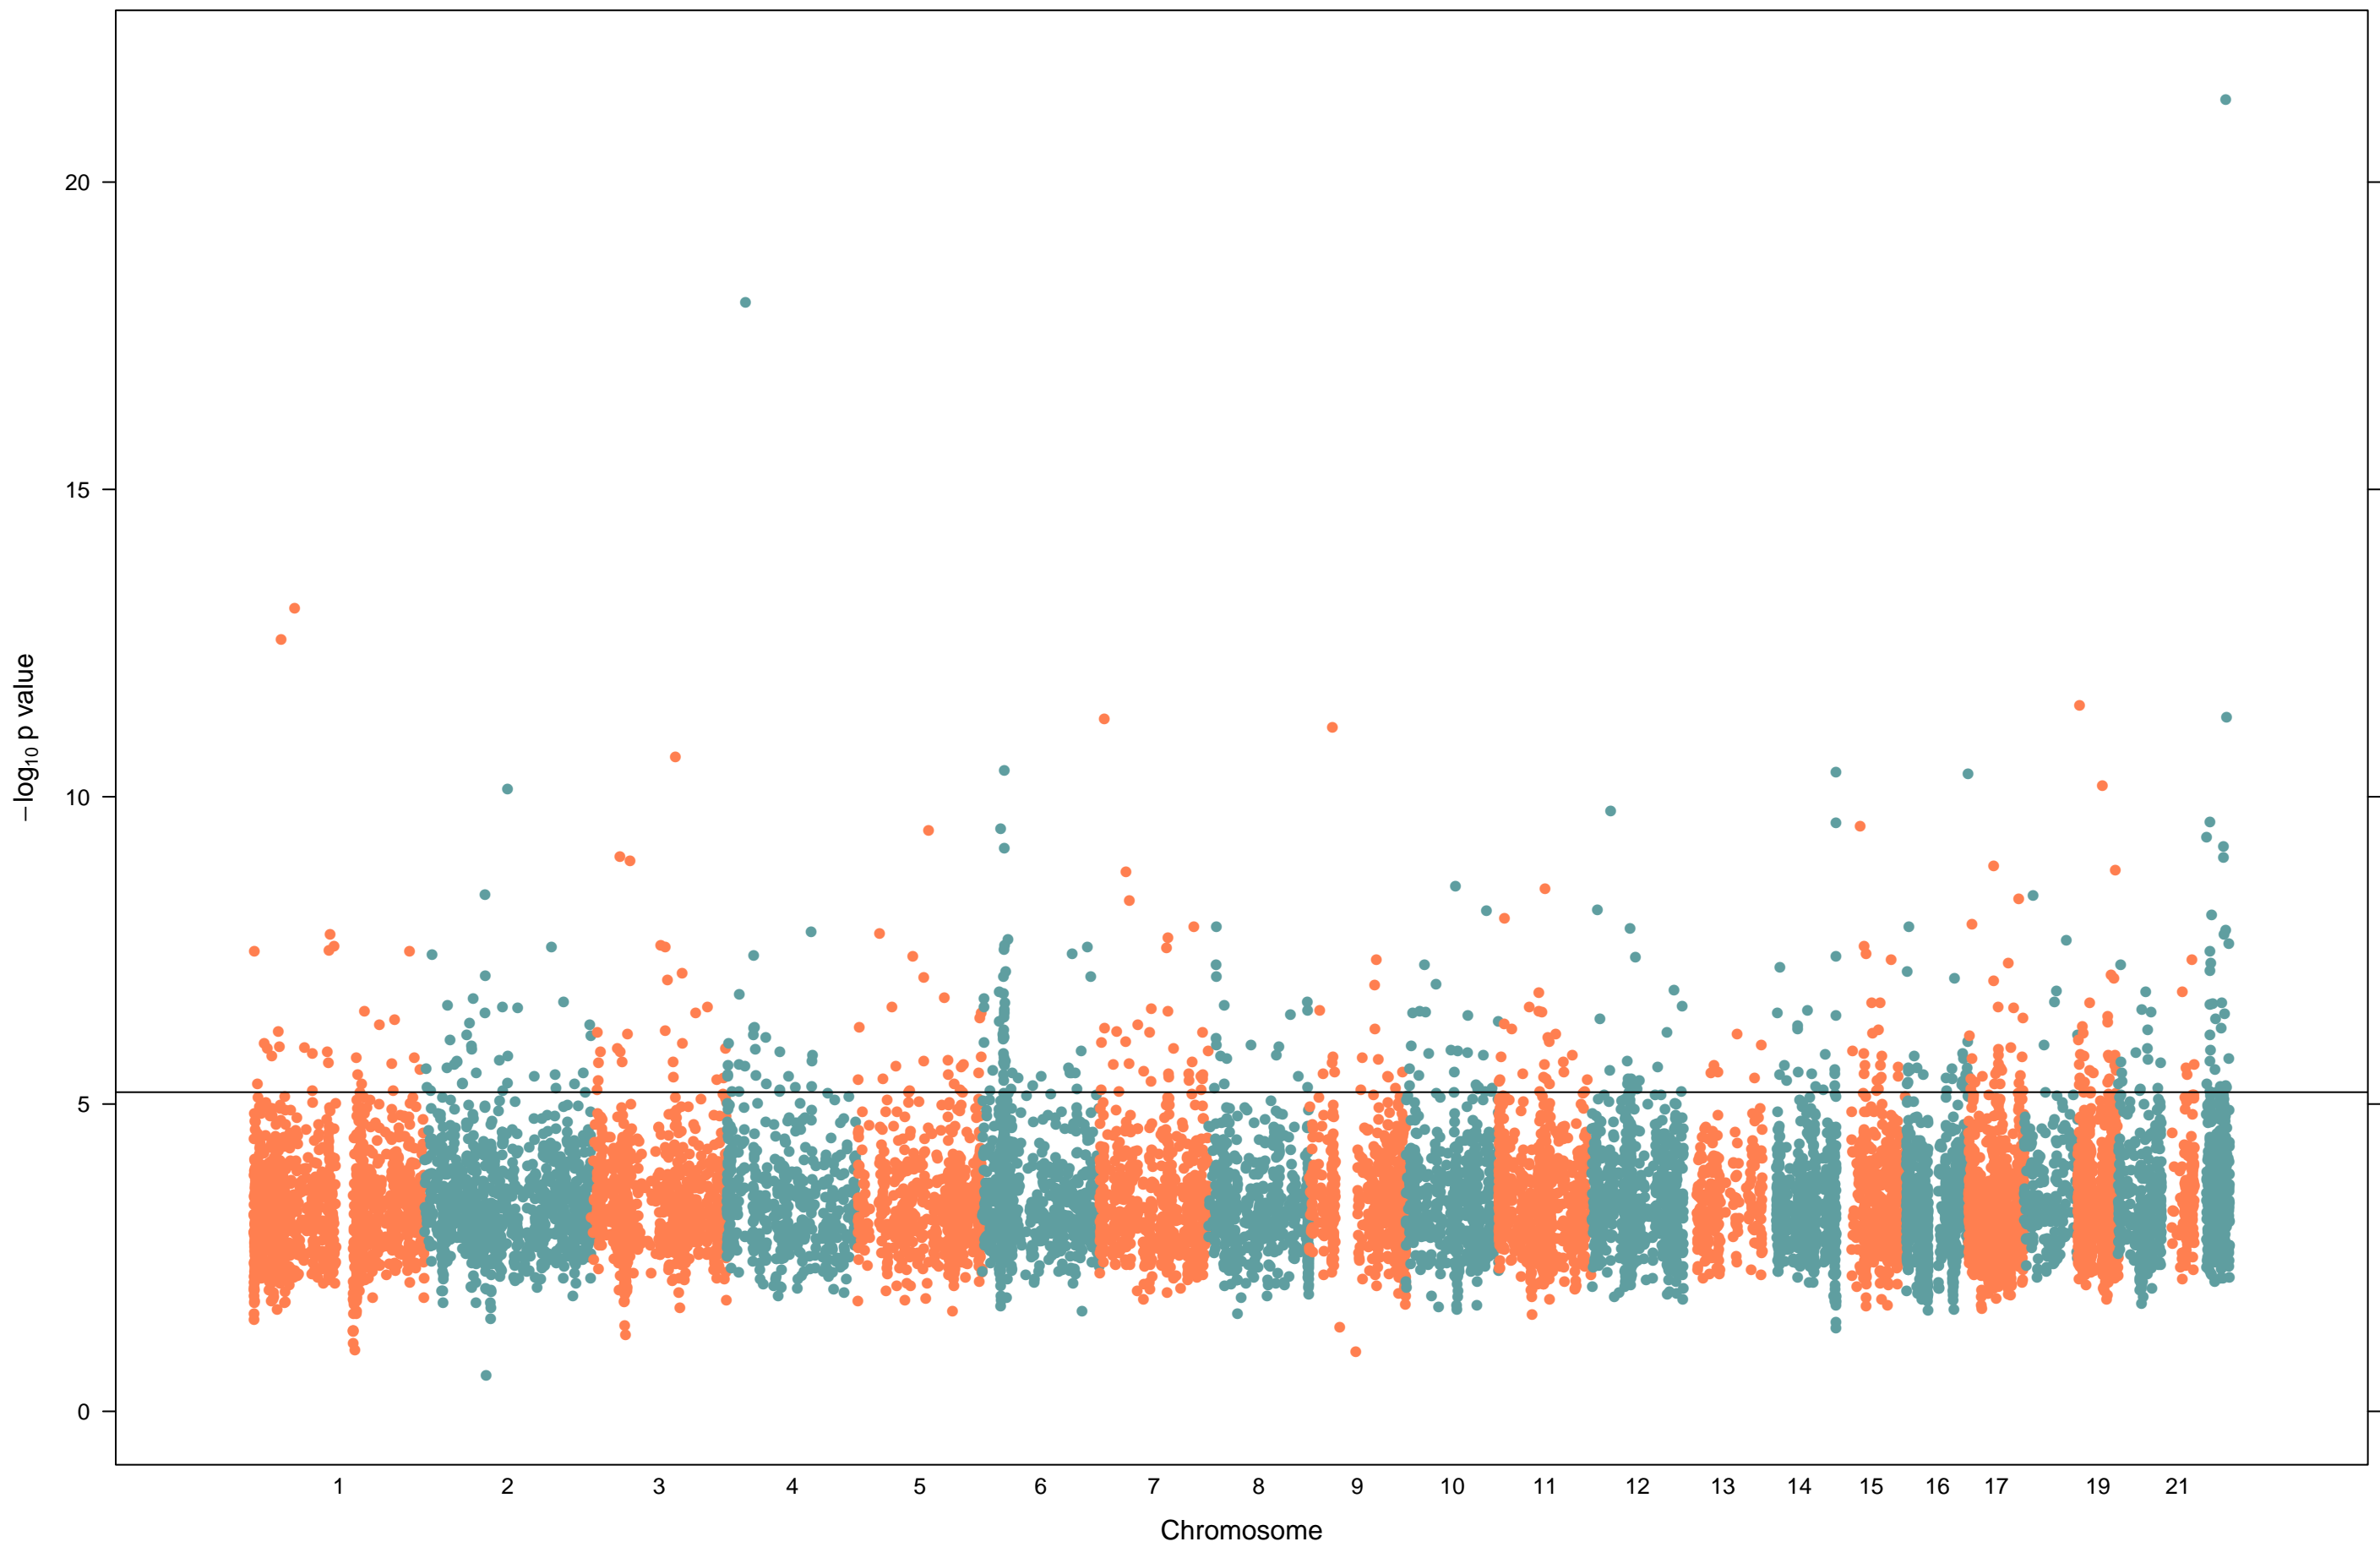

Supplement: supp [file elife_poa_e01381_Figure_1_figure_supplement_1.pdf › elife_poa_e01381_Figure_1_figure_supplement_1.pdf]

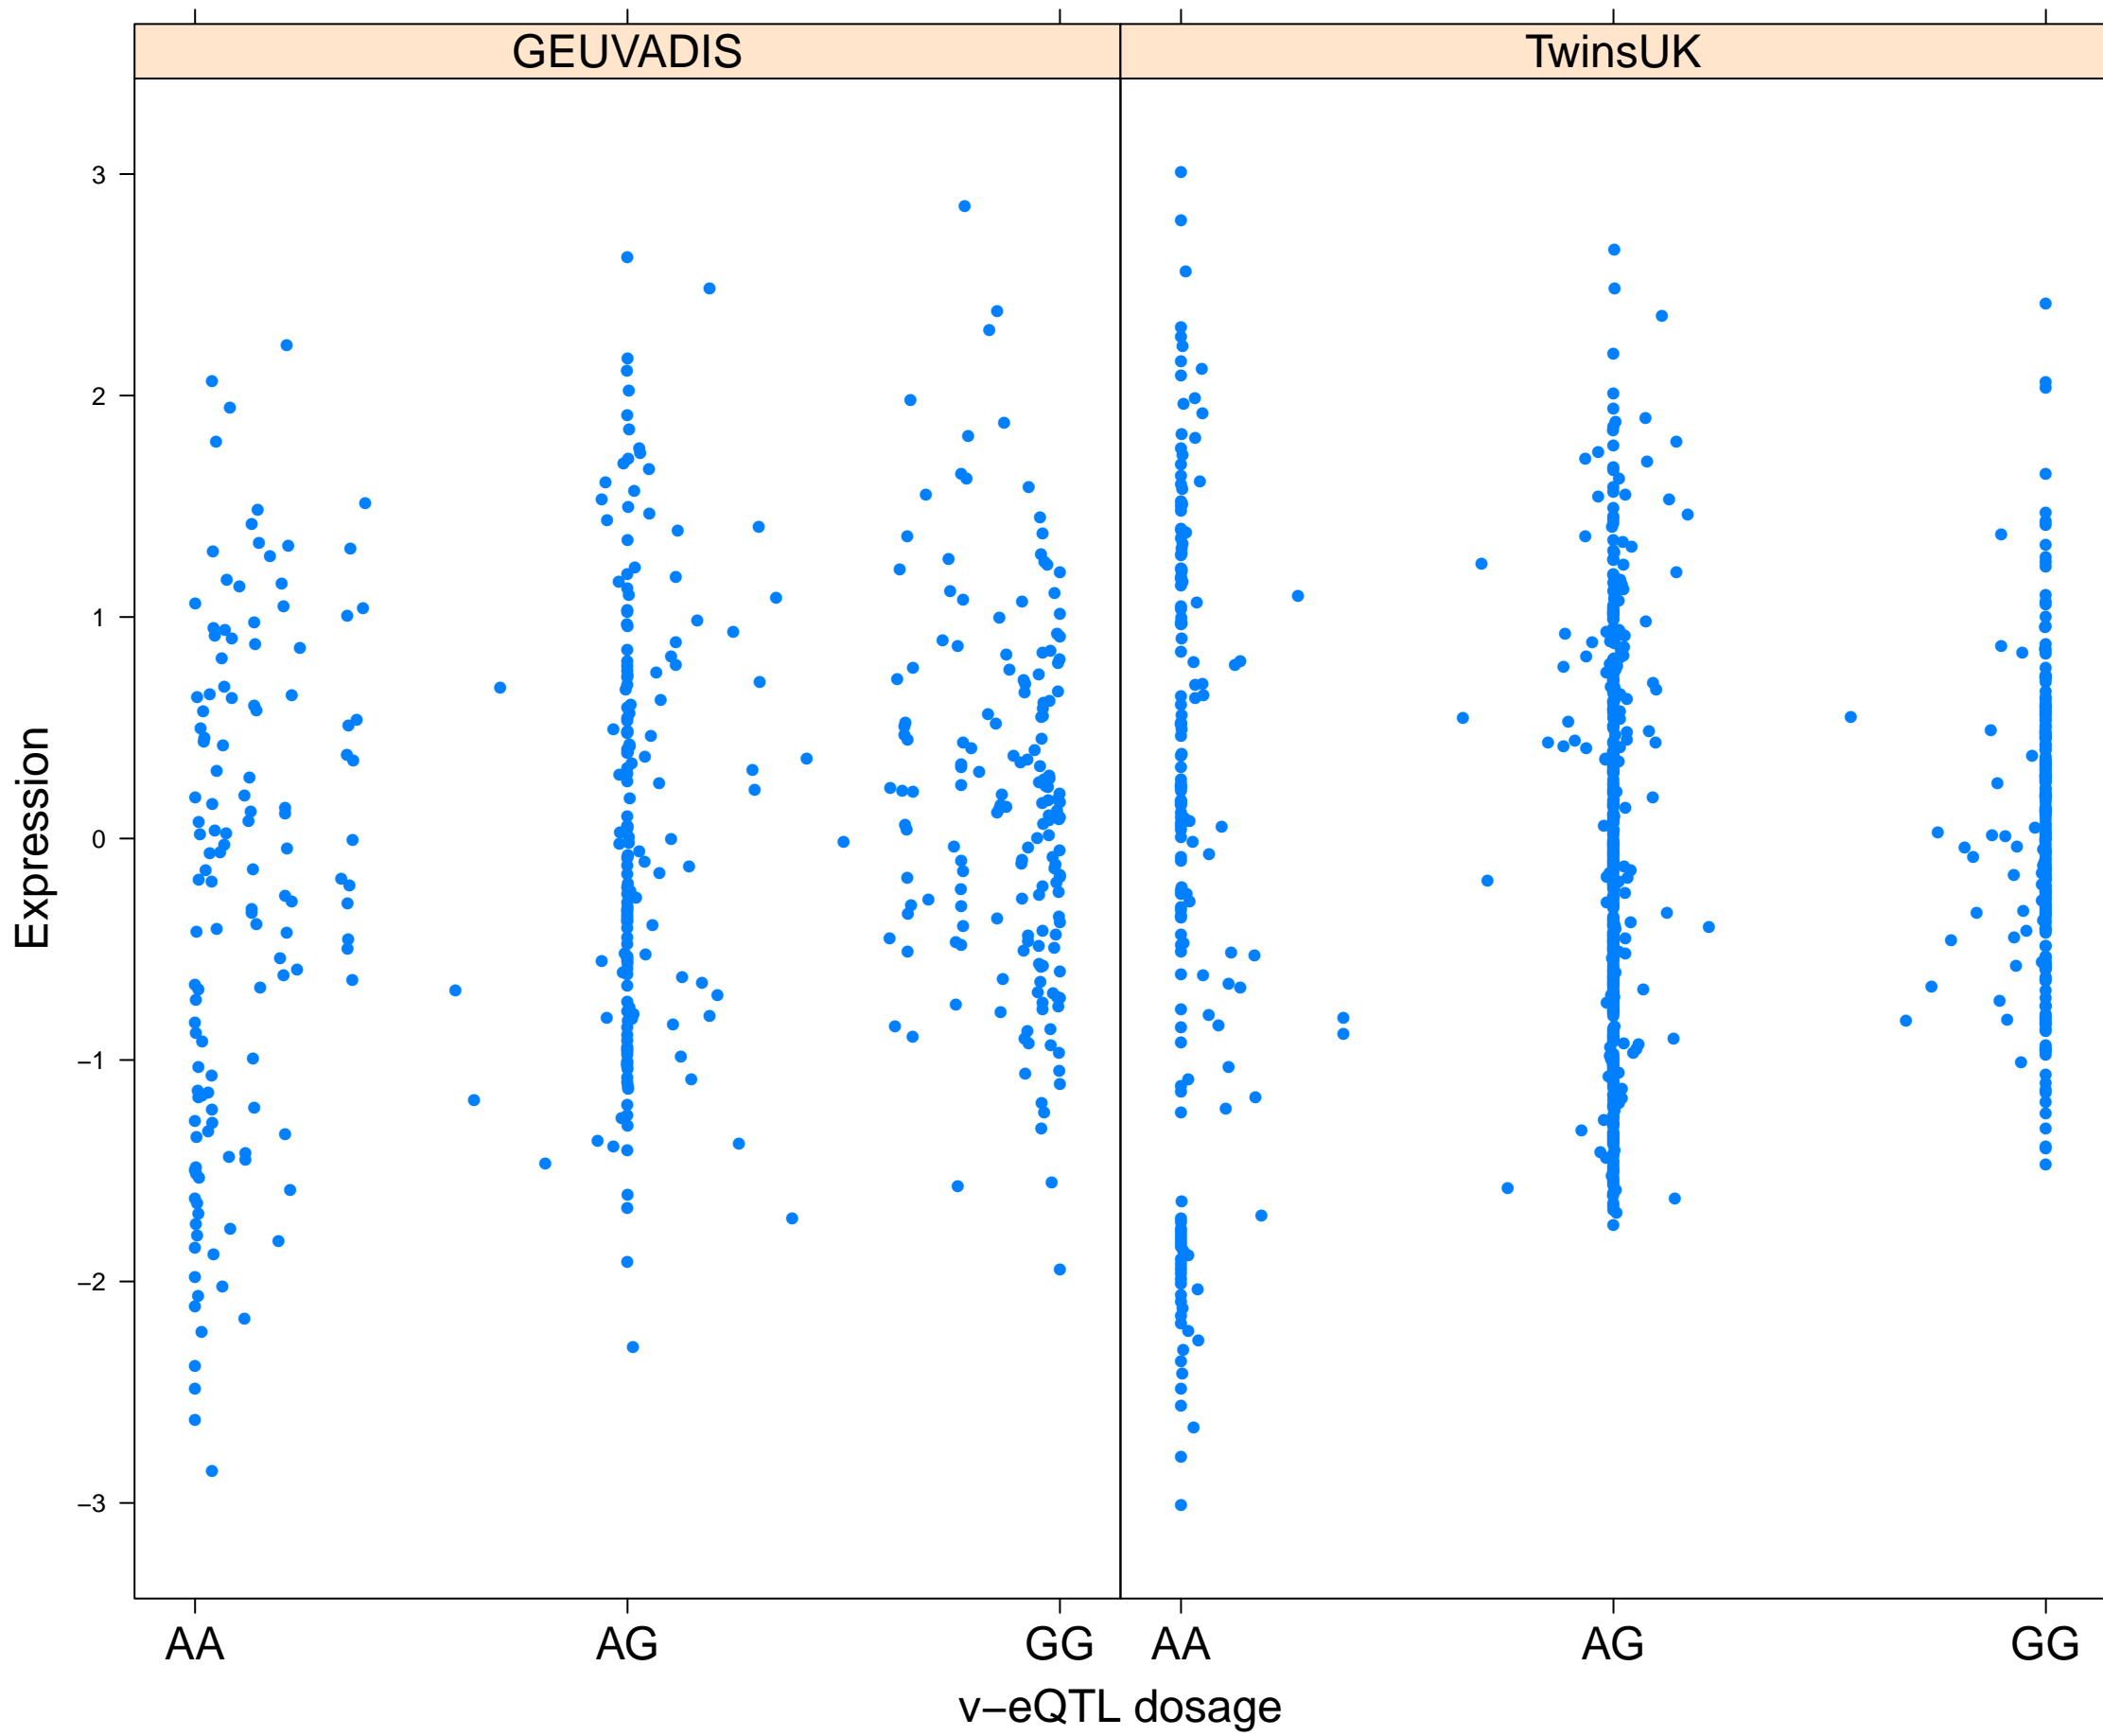

Supplement: supp [file elife_poa_e01381_Figure_1_figure_supplement_10.pdf › elife_poa_e01381_Figure_1_figure_supplement_10.pdf]

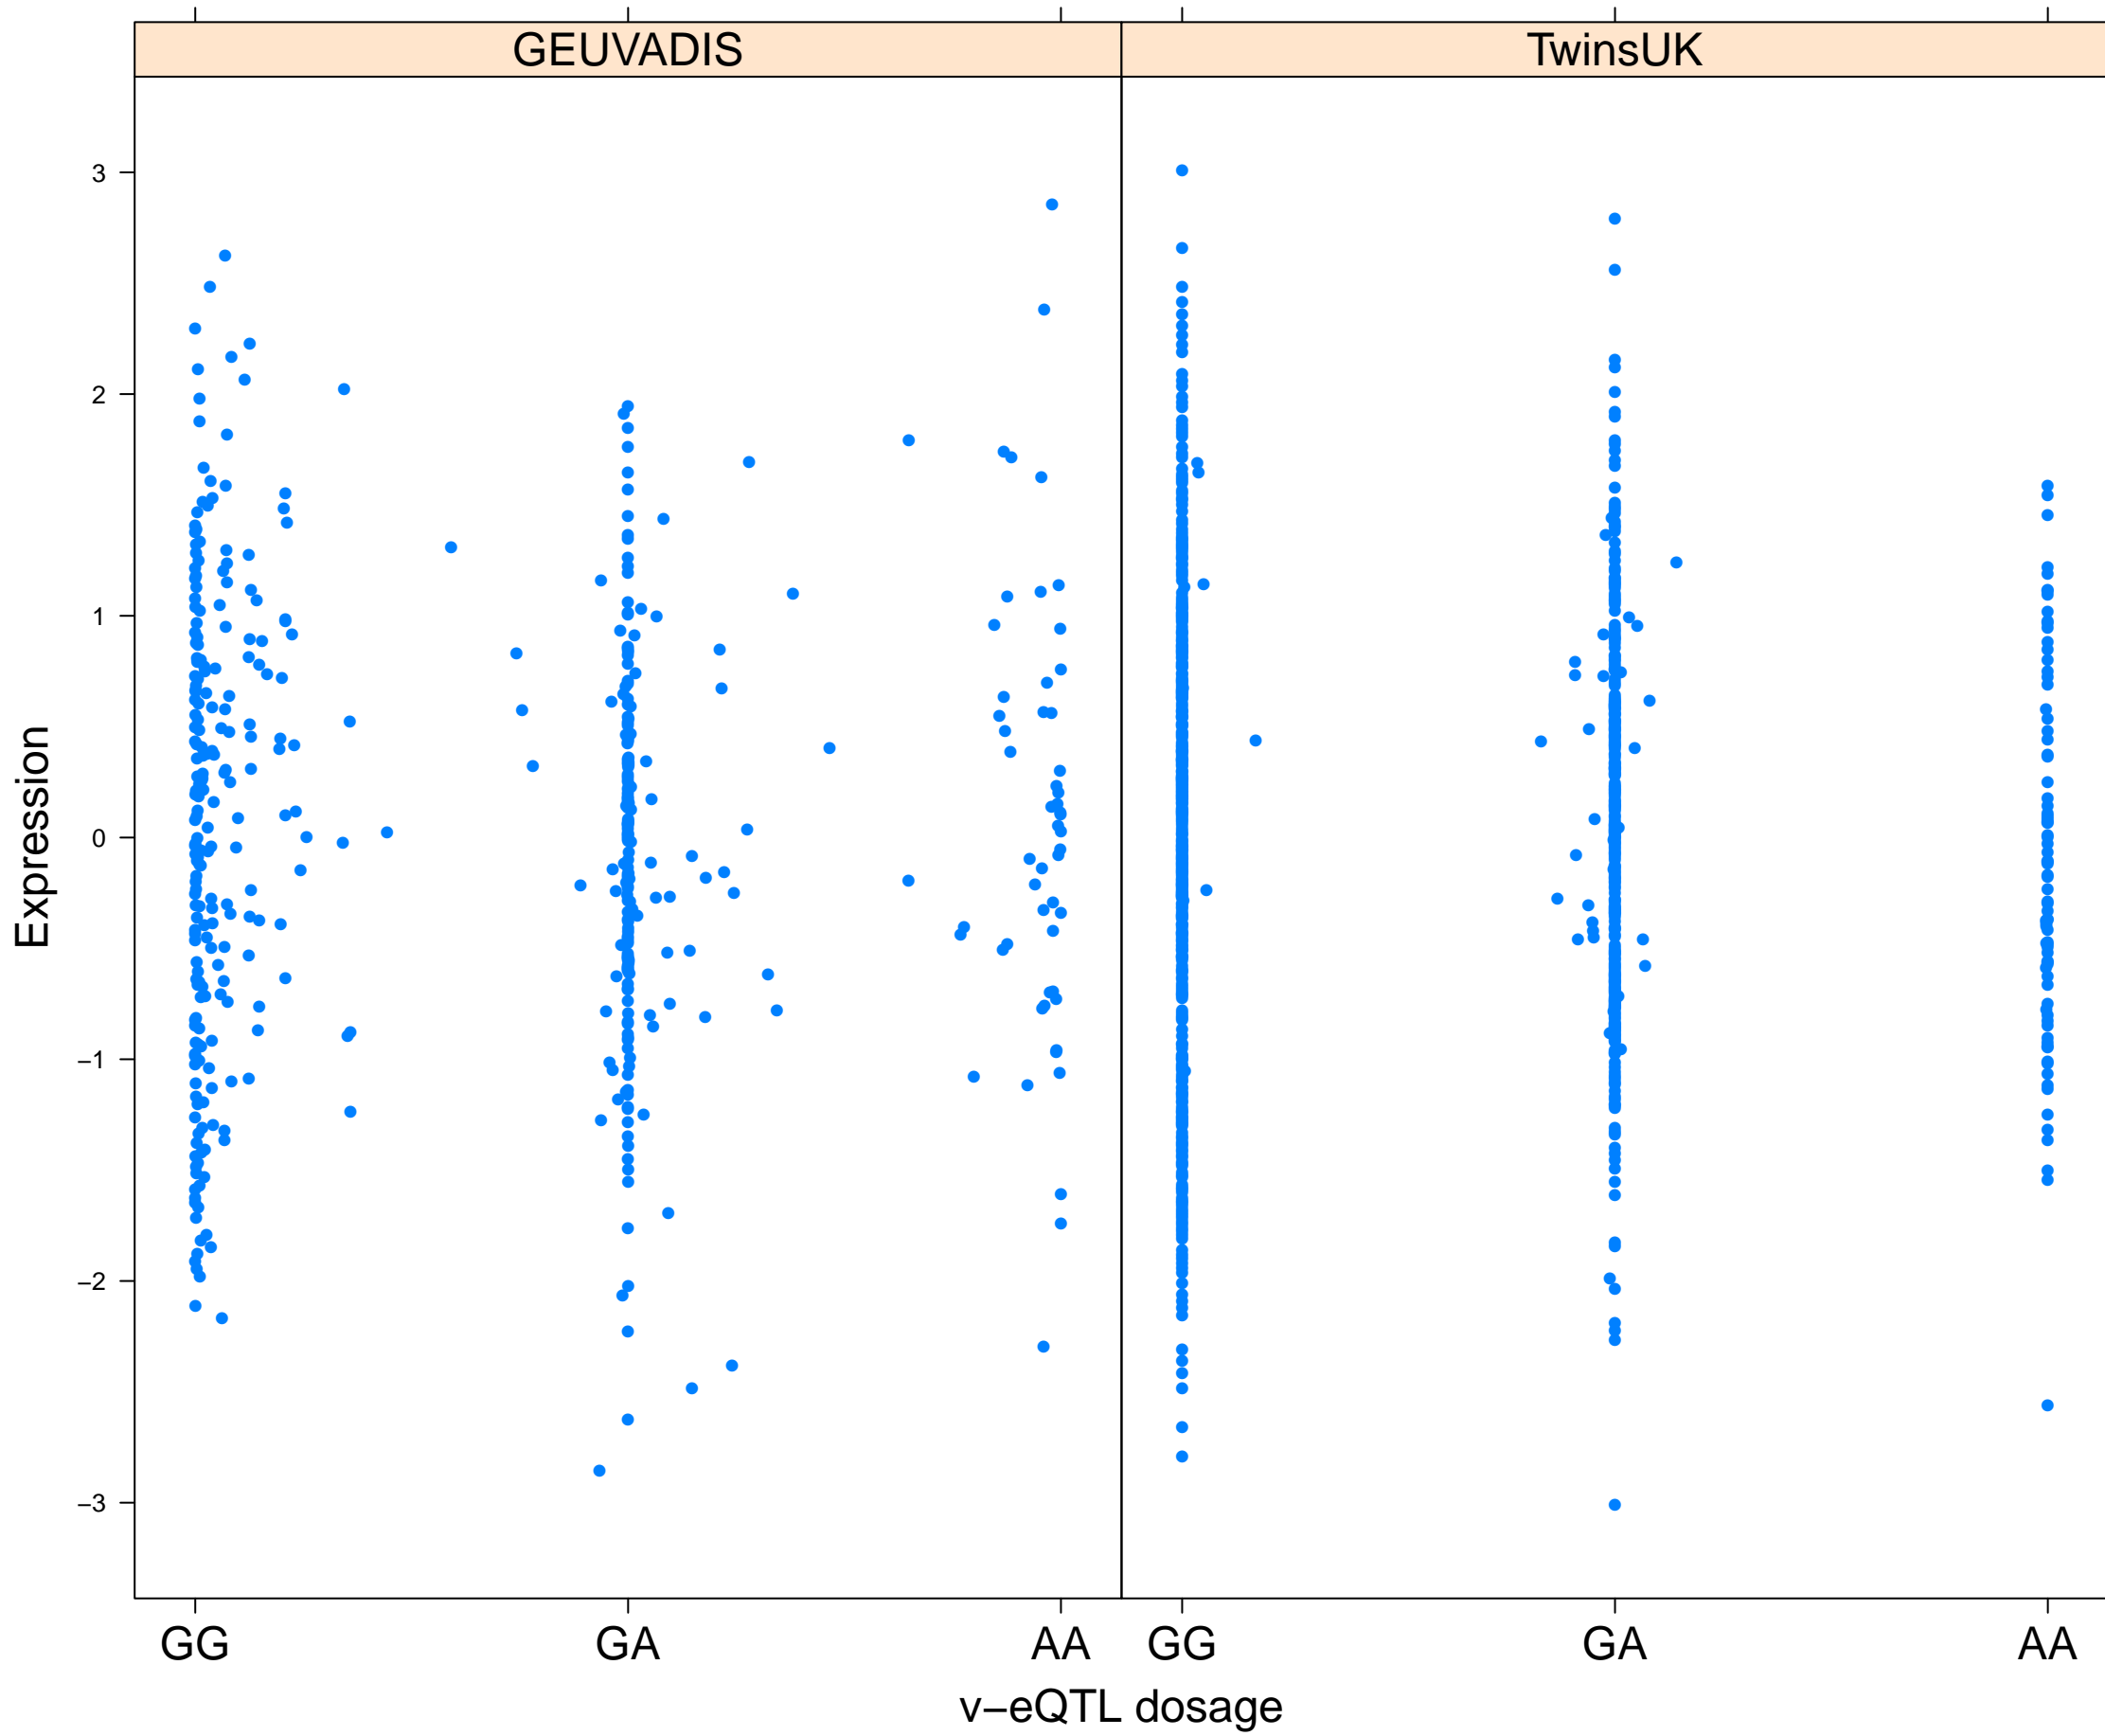

Supplement: supp [file elife_poa_e01381_Figure_1_figure_supplement_11.pdf › elife_poa_e01381_Figure_1_figure_supplement_11.pdf]

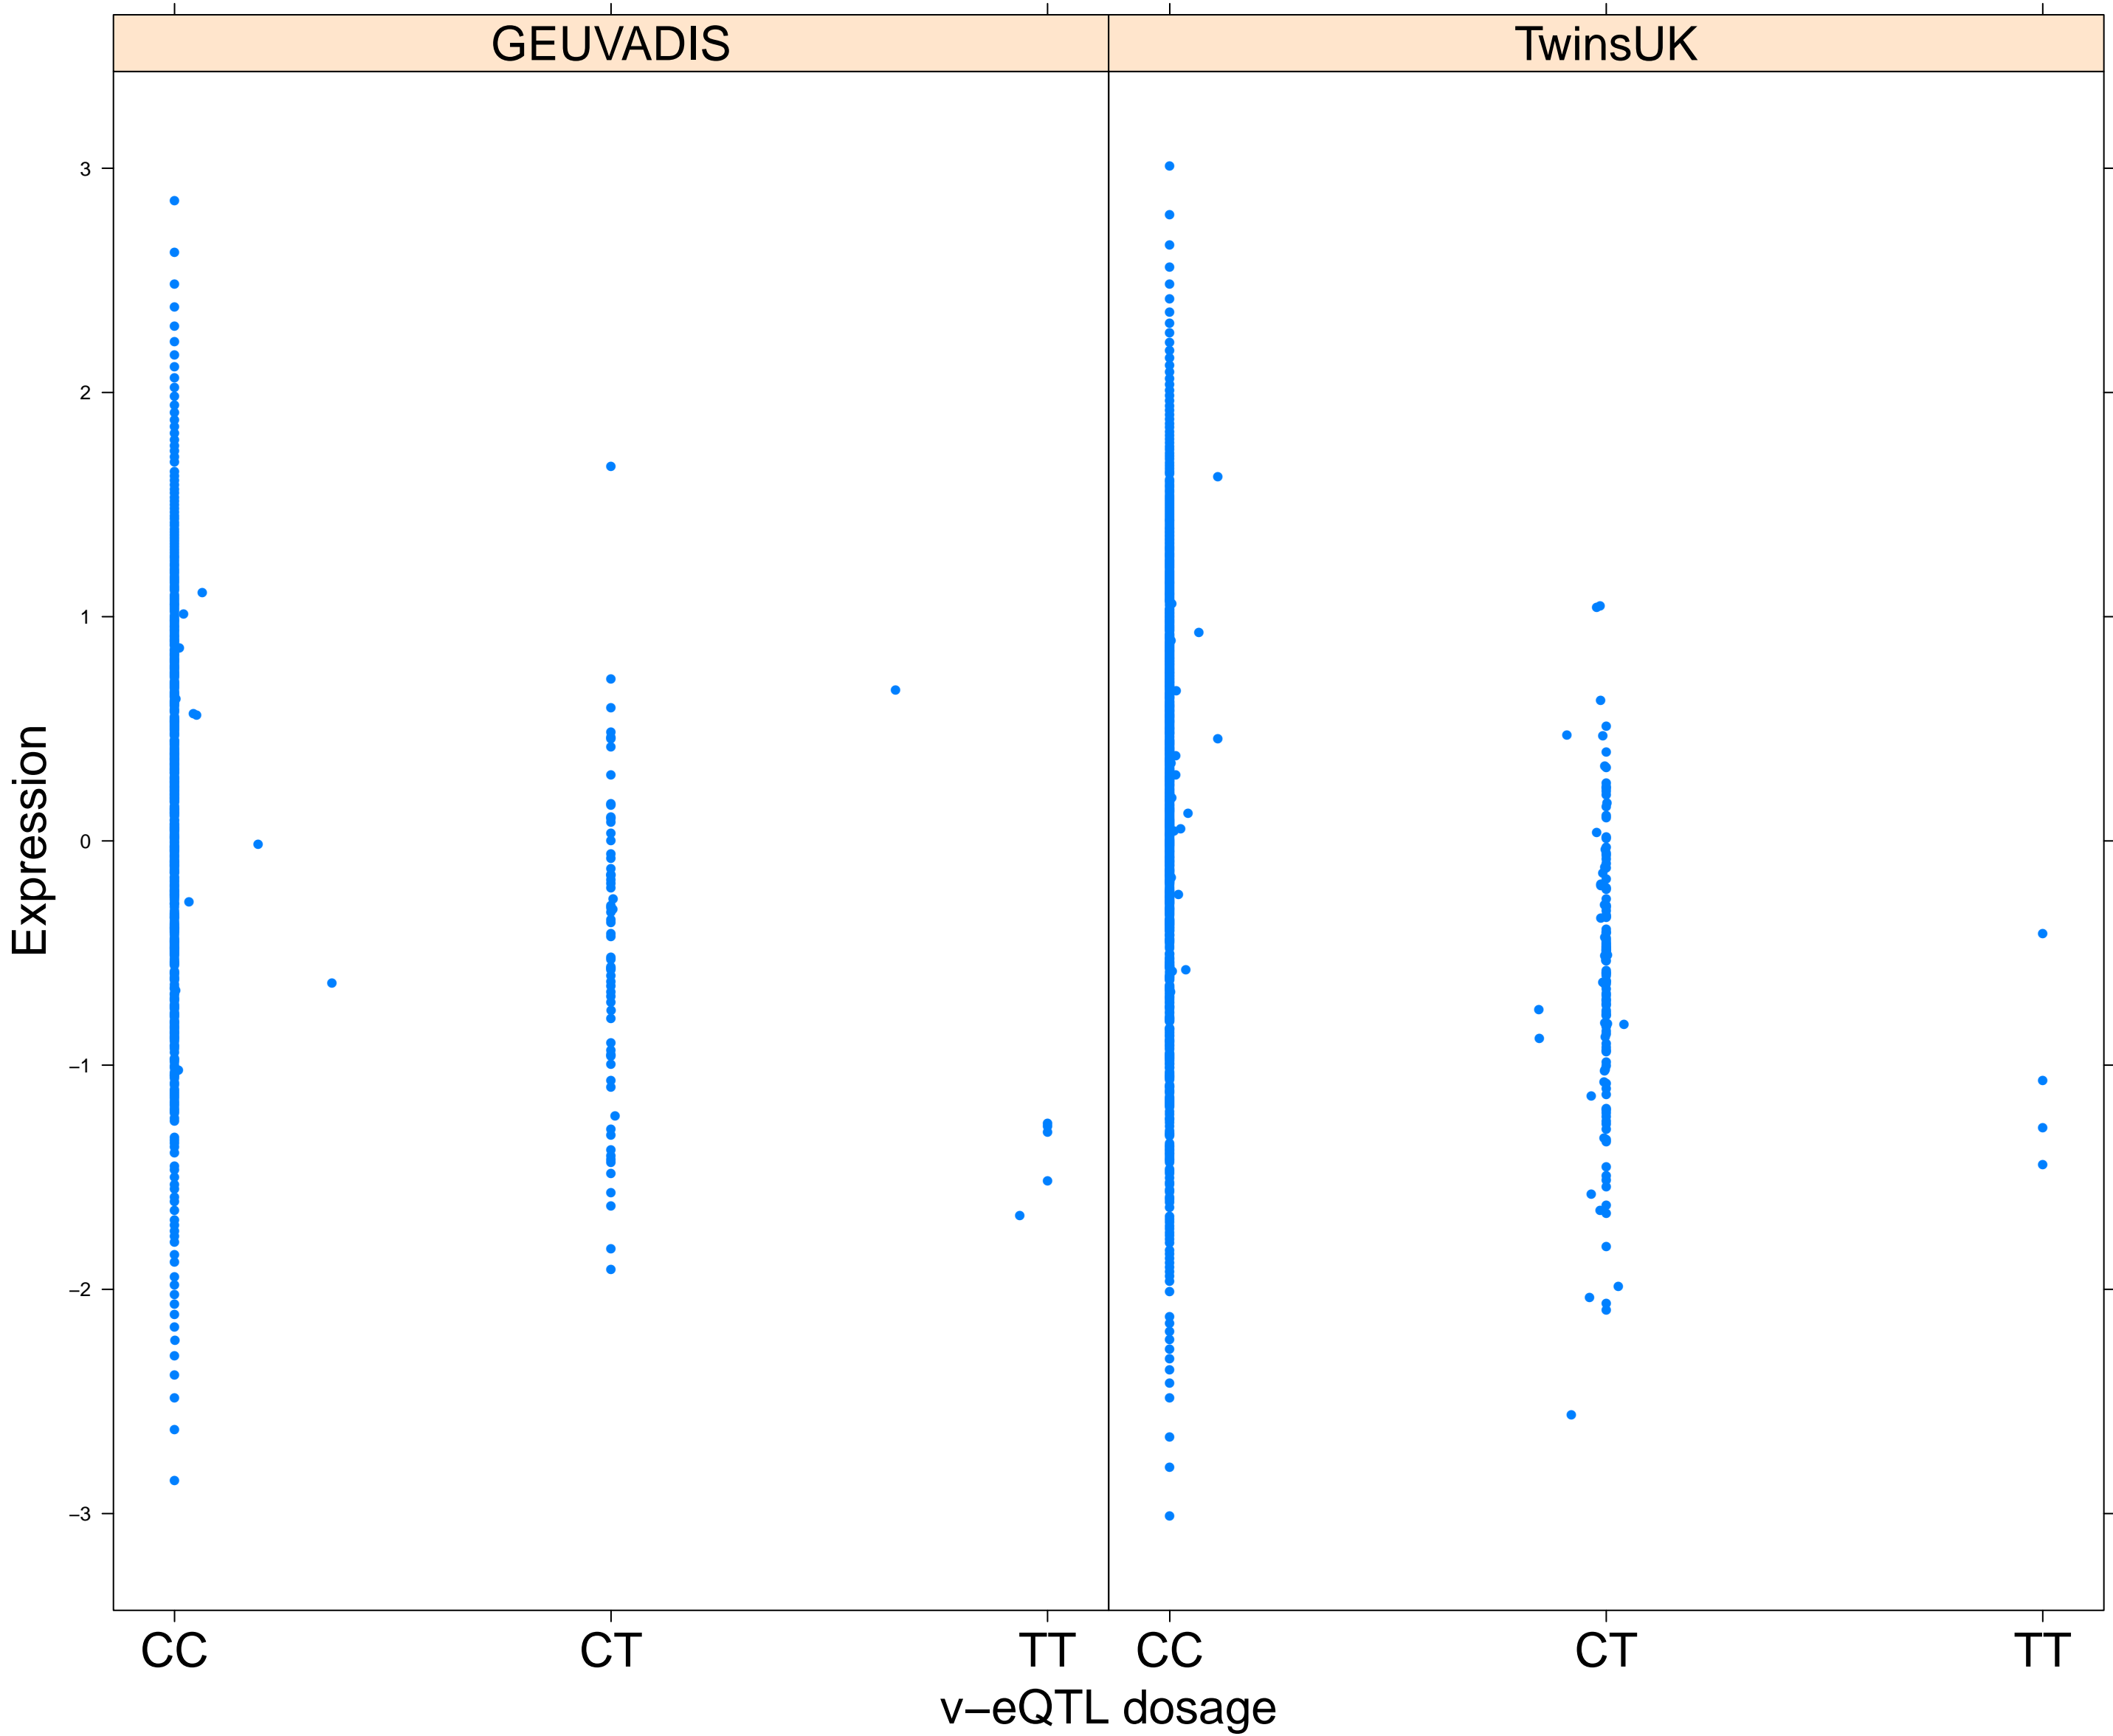

Supplement: supp [file elife_poa_e01381_Figure_1_figure_supplement_12.pdf › elife_poa_e01381_Figure_1_figure_supplement_12.pdf]

$-\log_{10}$  eQTL p value

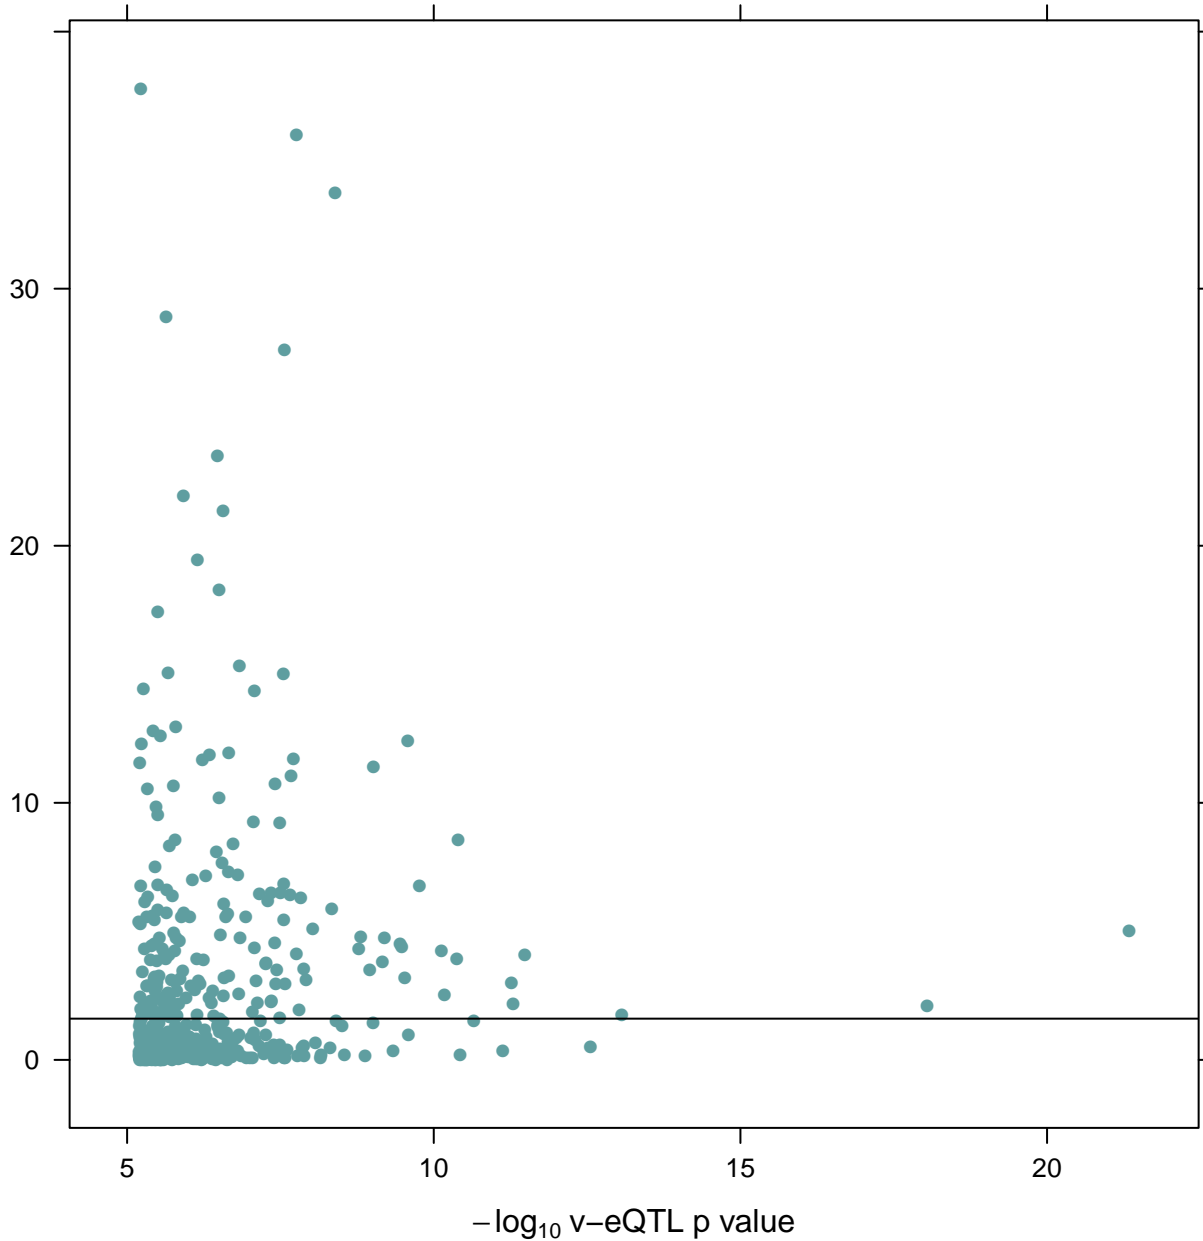

Supplement: supp [file elife_poa_e01381_Figure_1_figure_supplement_2.pdf › elife_poa_e01381_Figure_1_figure_supplement_2.pdf]

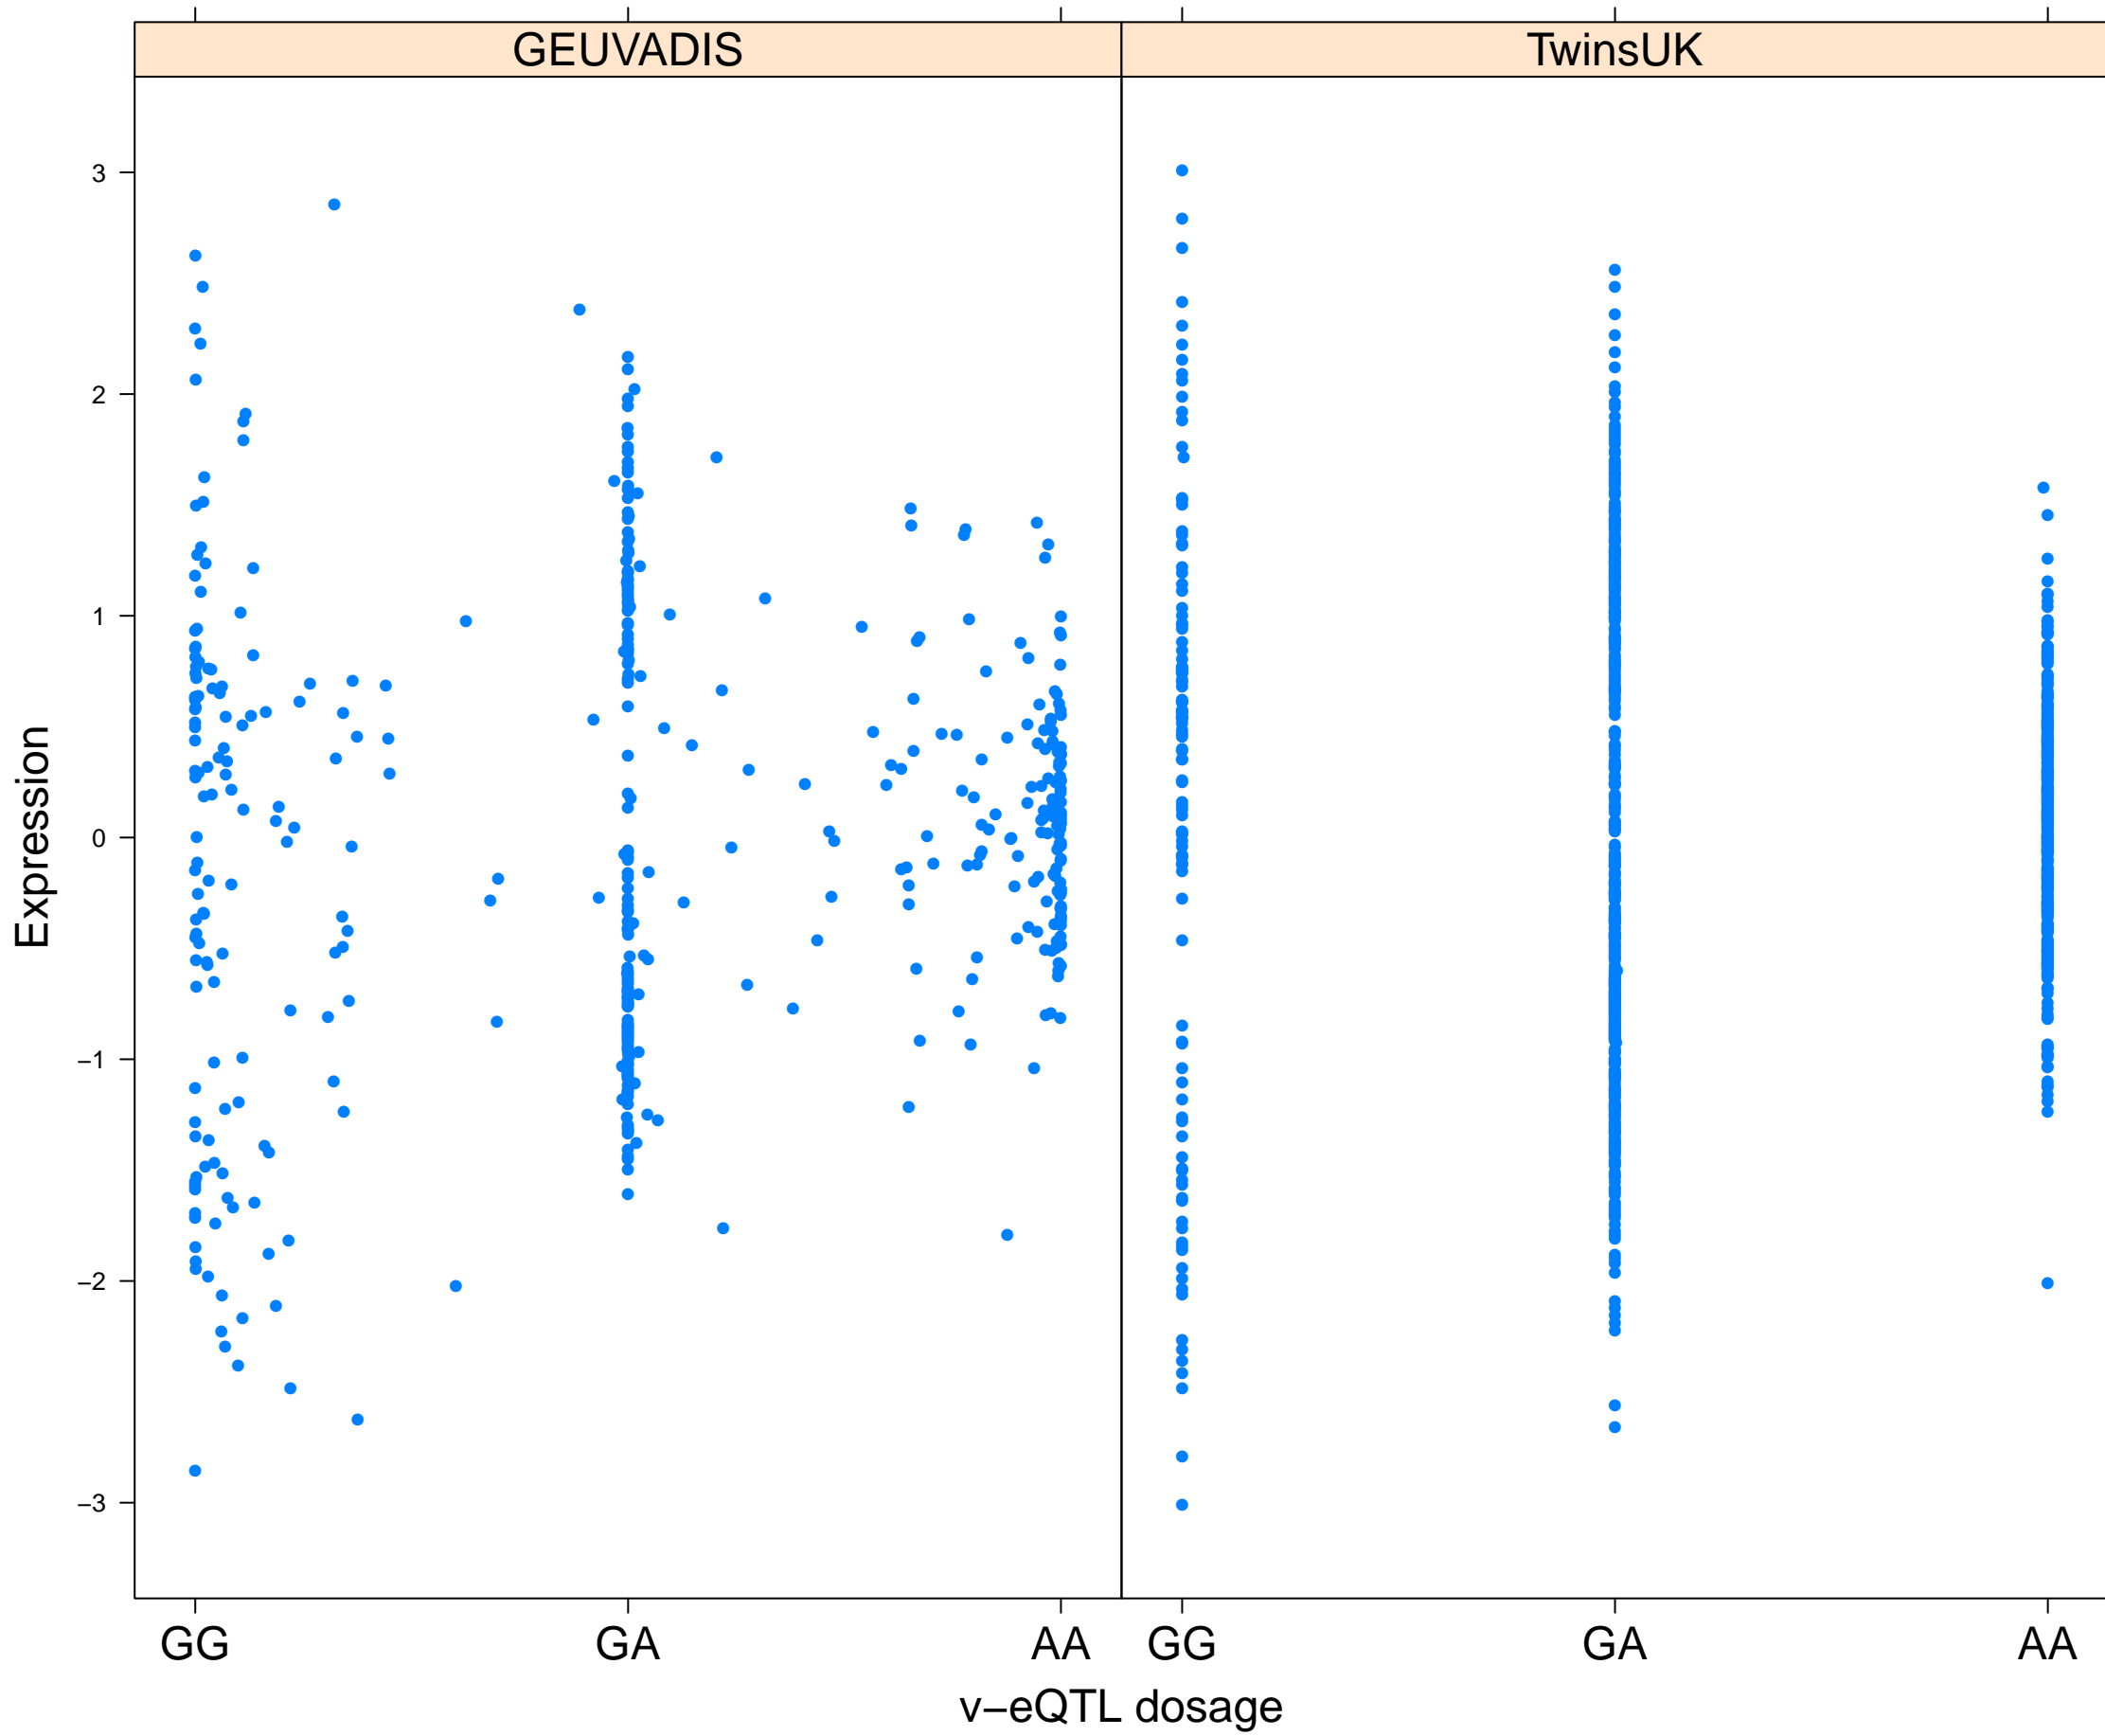

Supplement: supp [file elife_poa_e01381_Figure_1_figure_supplement_3.pdf › elife_poa_e01381_Figure_1_figure_supplement_3.pdf]

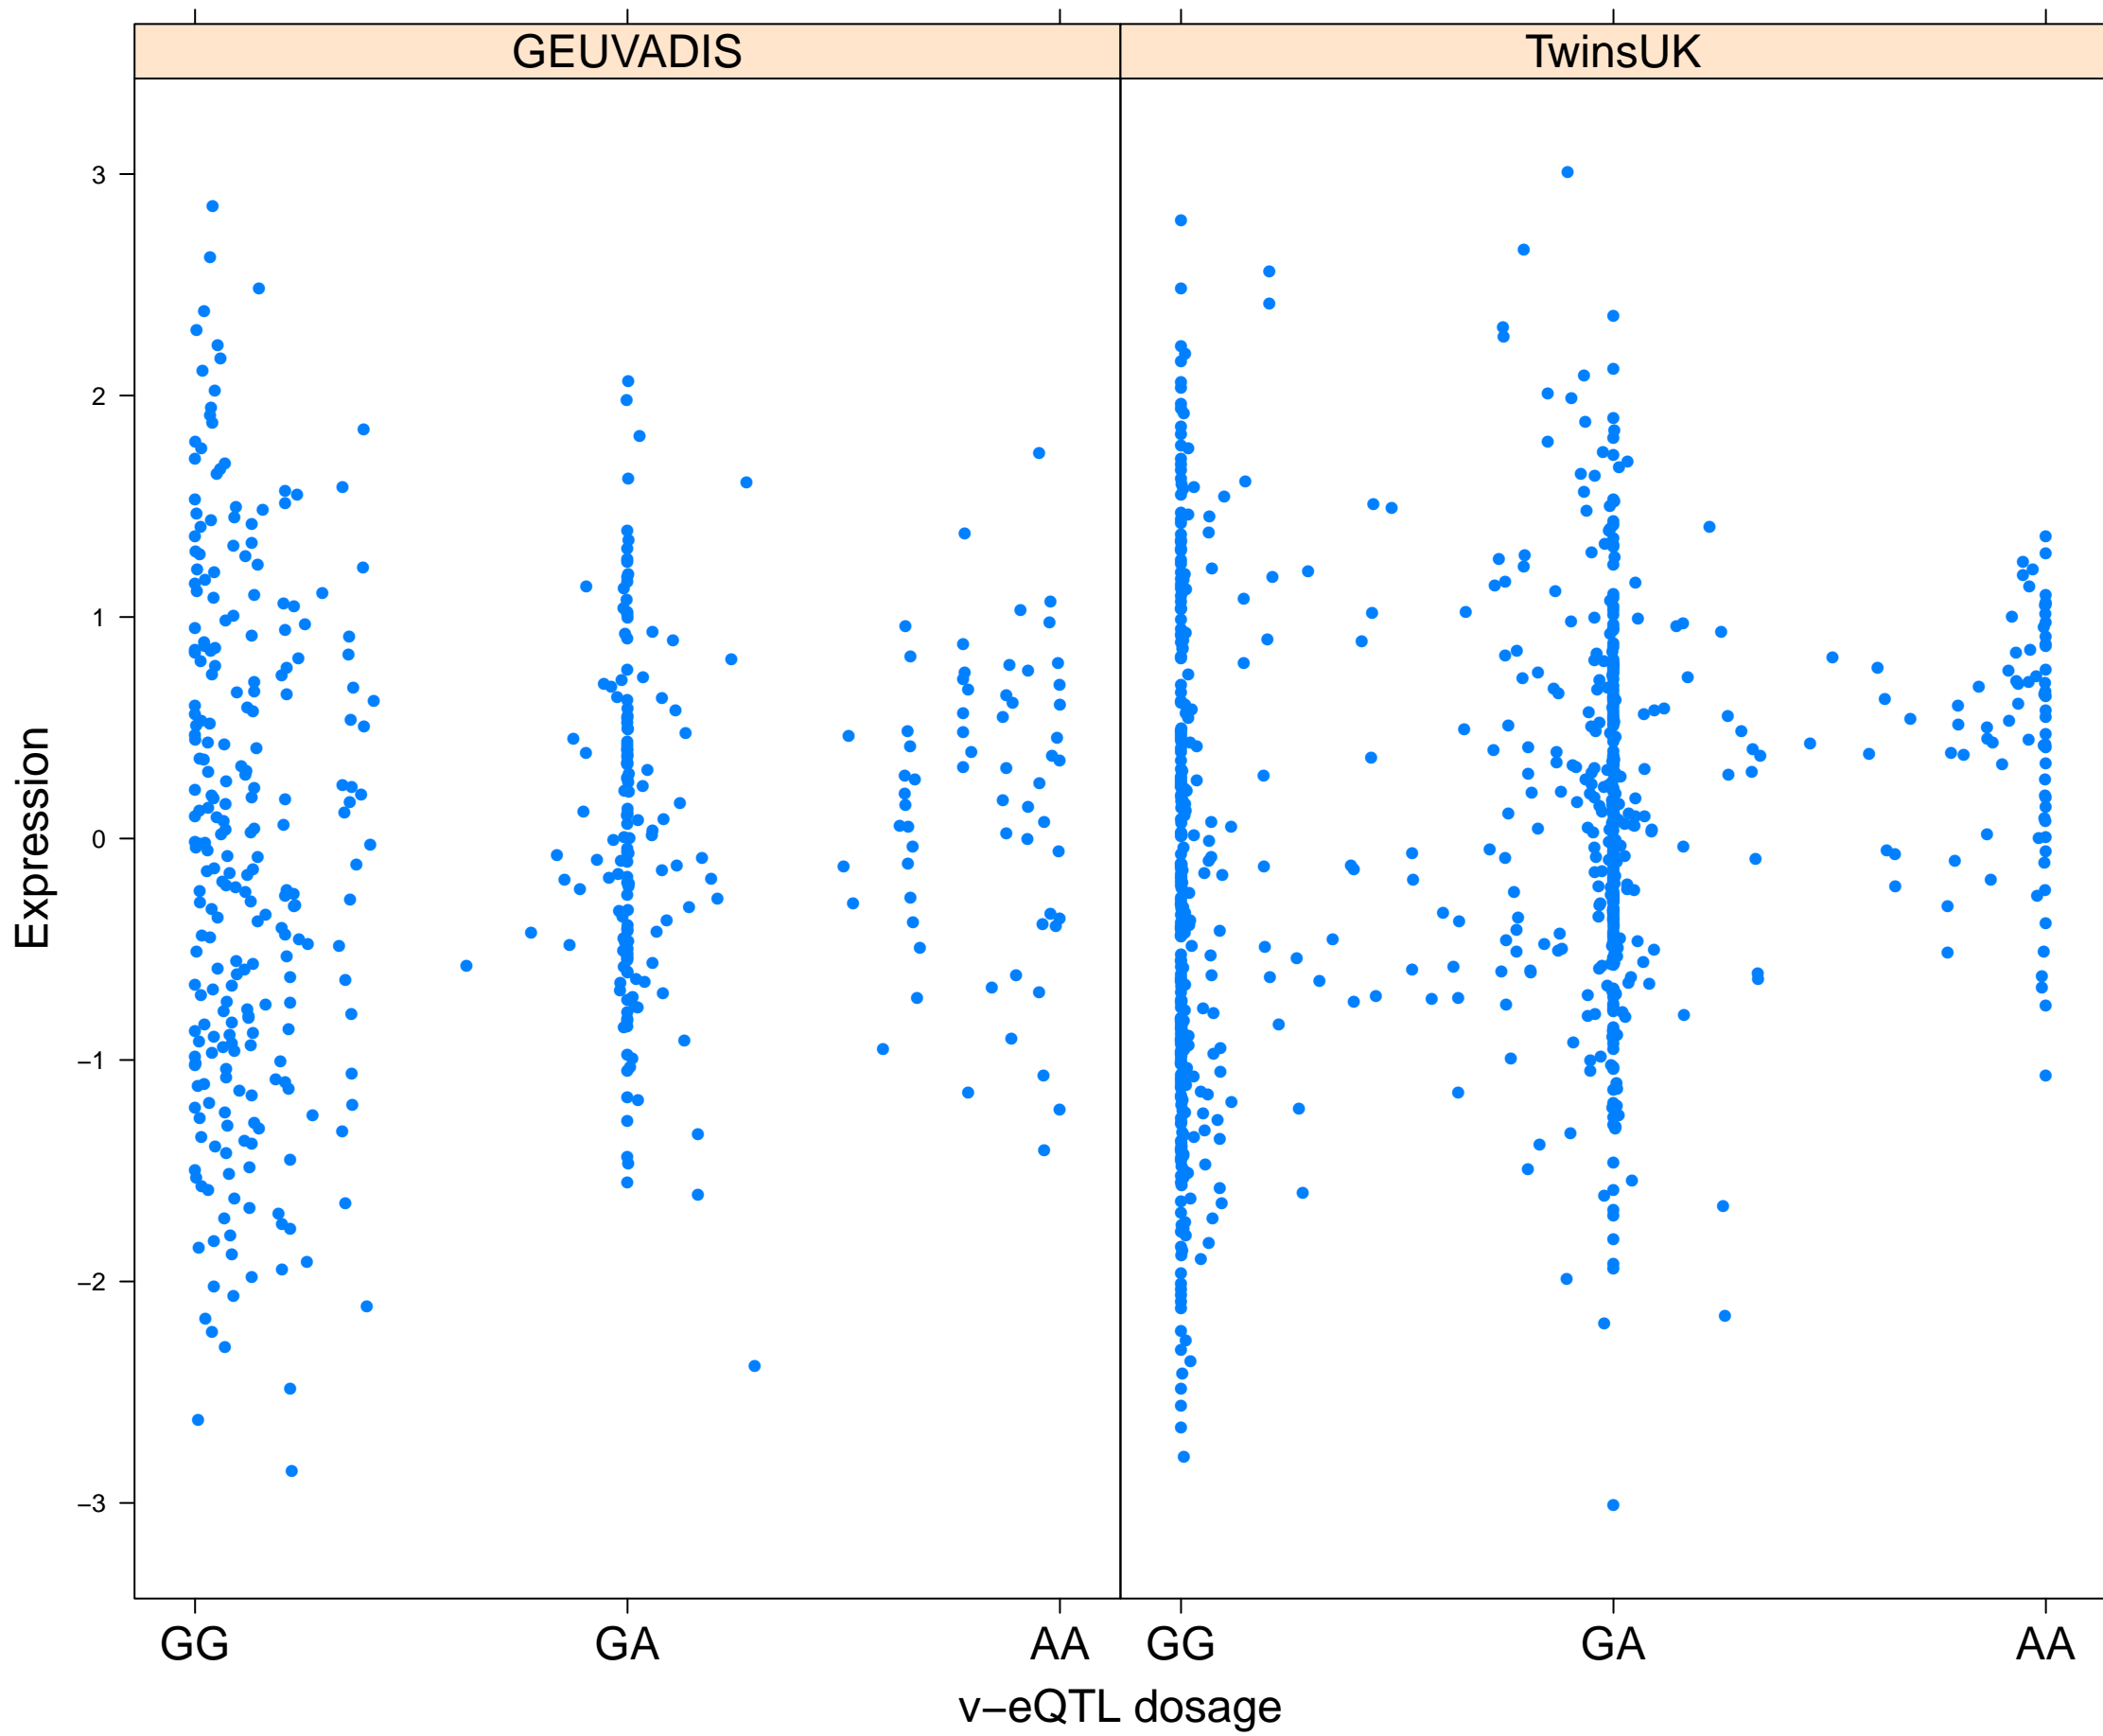

Supplement: supp [file elife_poa_e01381_Figure_1_figure_supplement_4.pdf › elife_poa_e01381_Figure_1_figure_supplement_4.pdf]

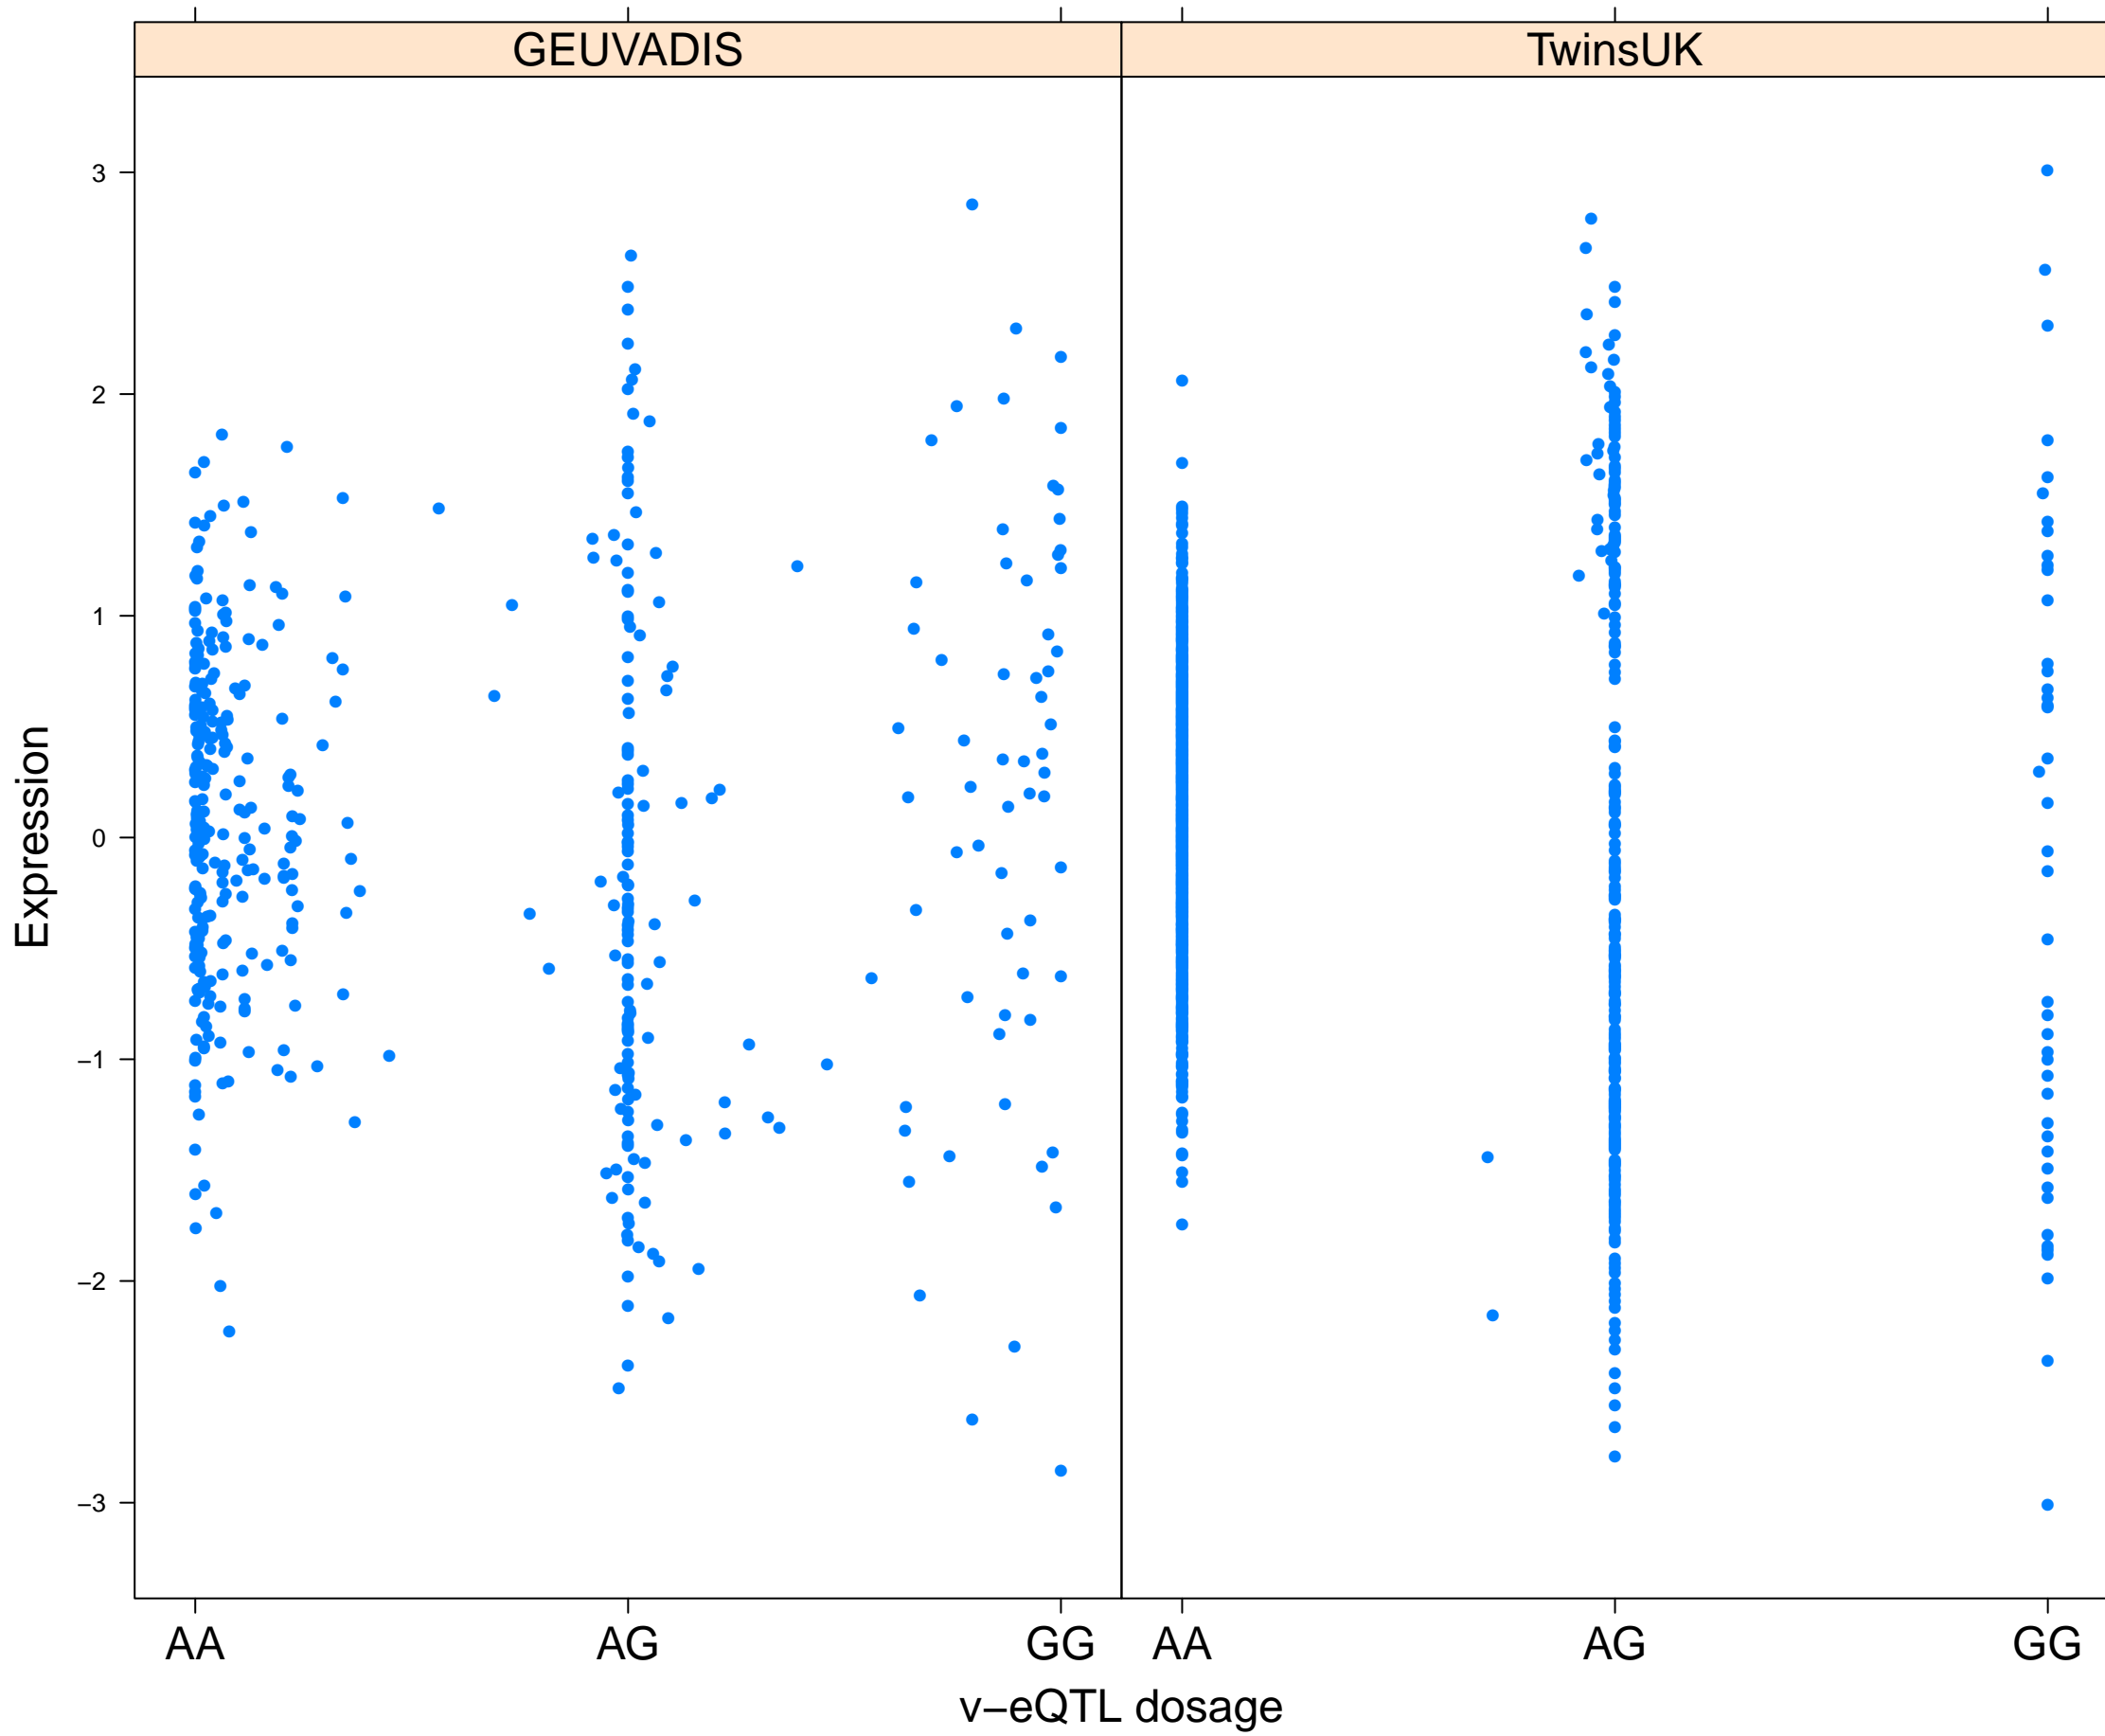

Supplement: supp [file elife_poa_e01381_Figure_1_figure_supplement_5.pdf › elife_poa_e01381_Figure_1_figure_supplement_5.pdf]

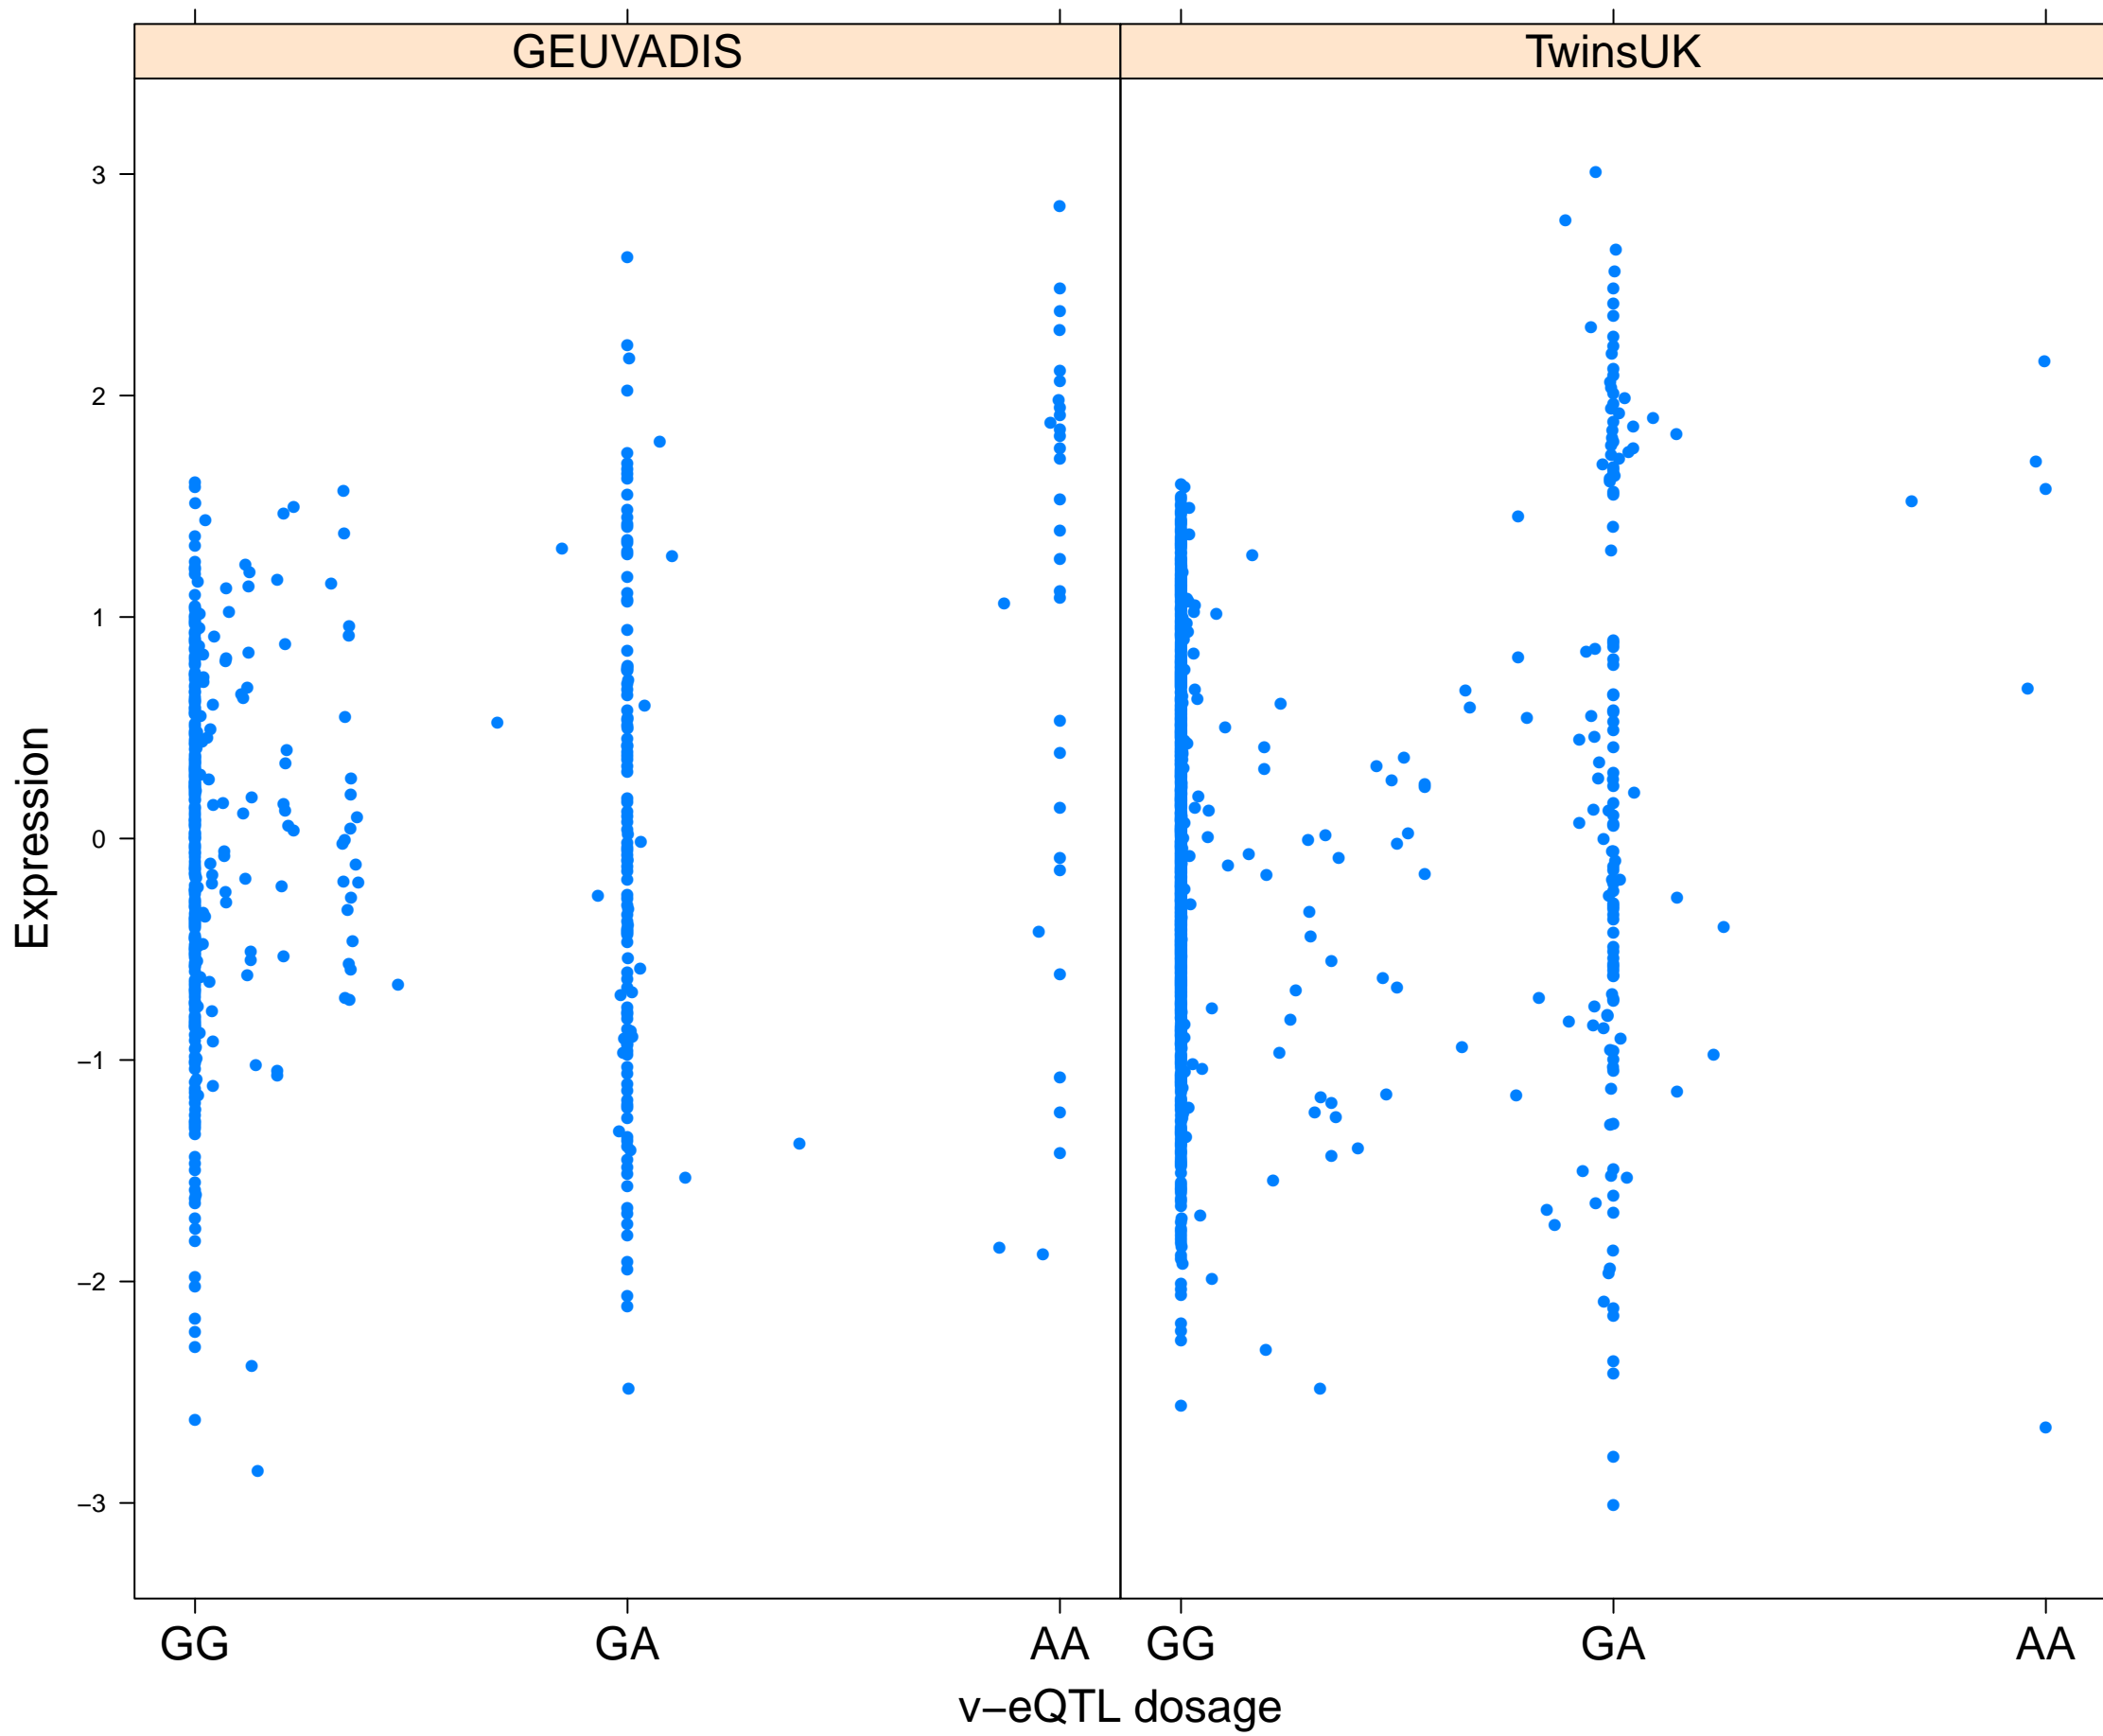

Supplement: supp [file elife_poa_e01381_Figure_1_figure_supplement_6.pdf › elife_poa_e01381_Figure_1_figure_supplement_6.pdf]

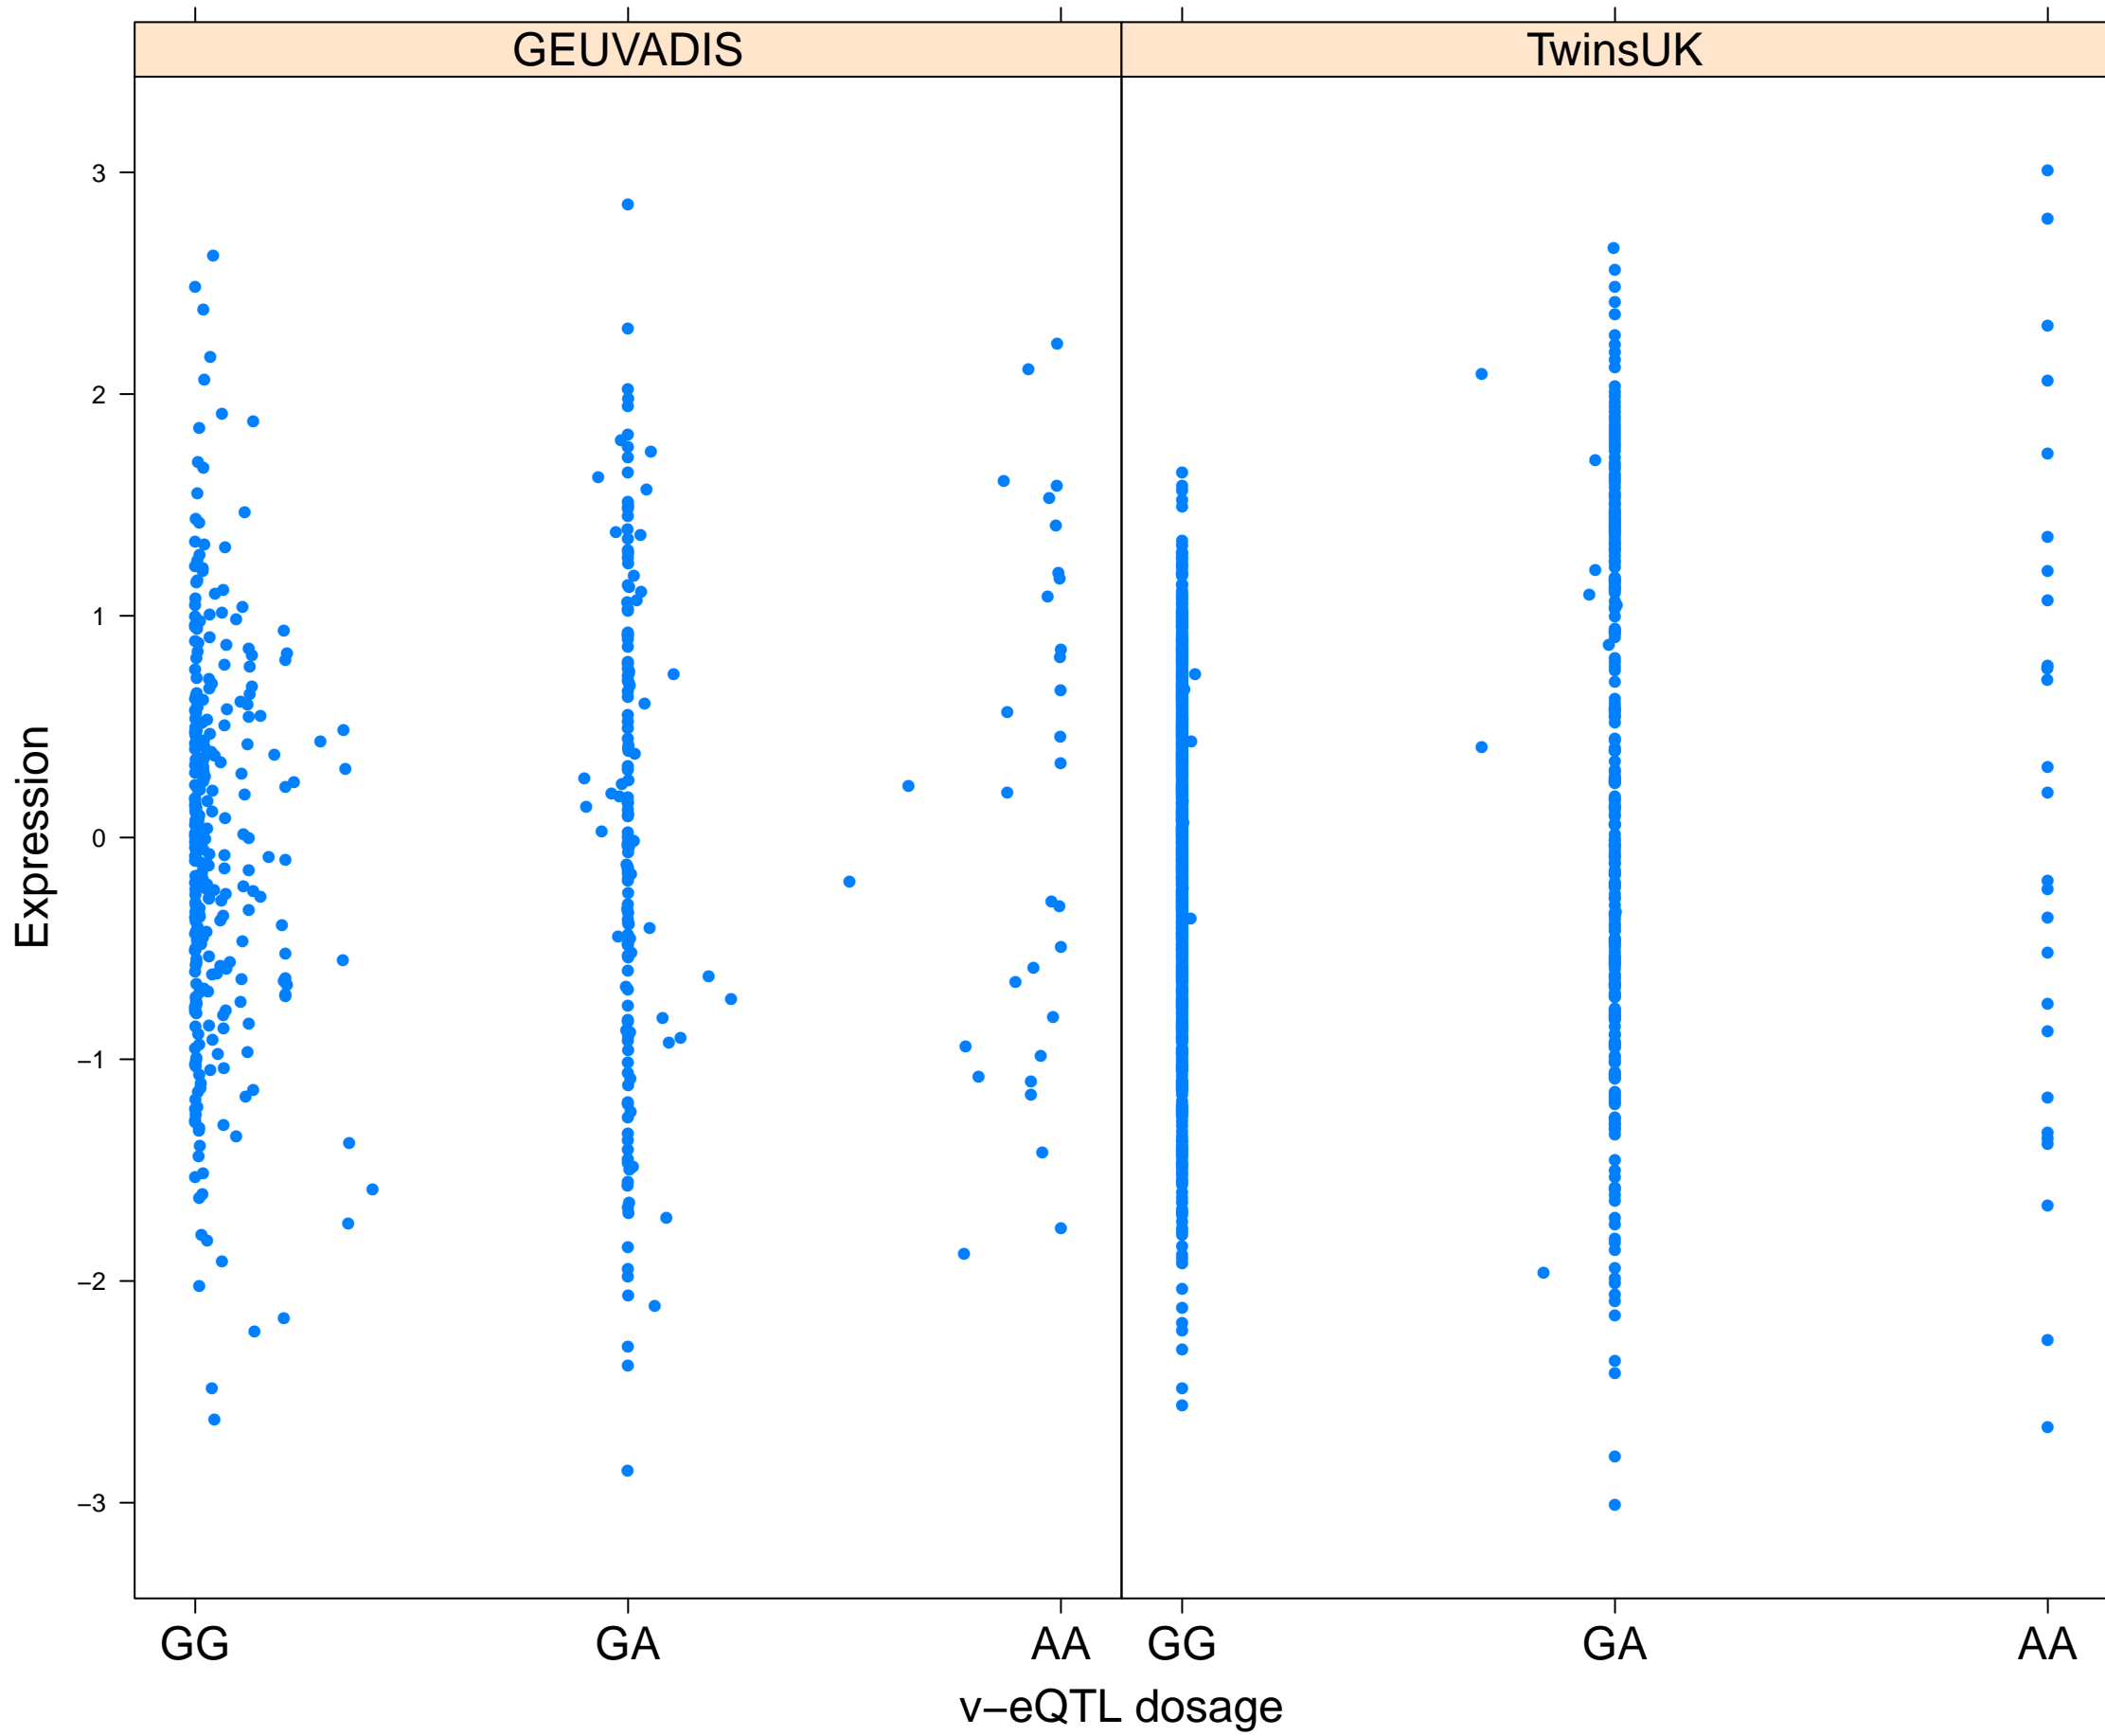

Supplement: supp [file elife_poa_e01381_Figure_1_figure_supplement_7.pdf › elife_poa_e01381_Figure_1_figure_supplement_7.pdf]

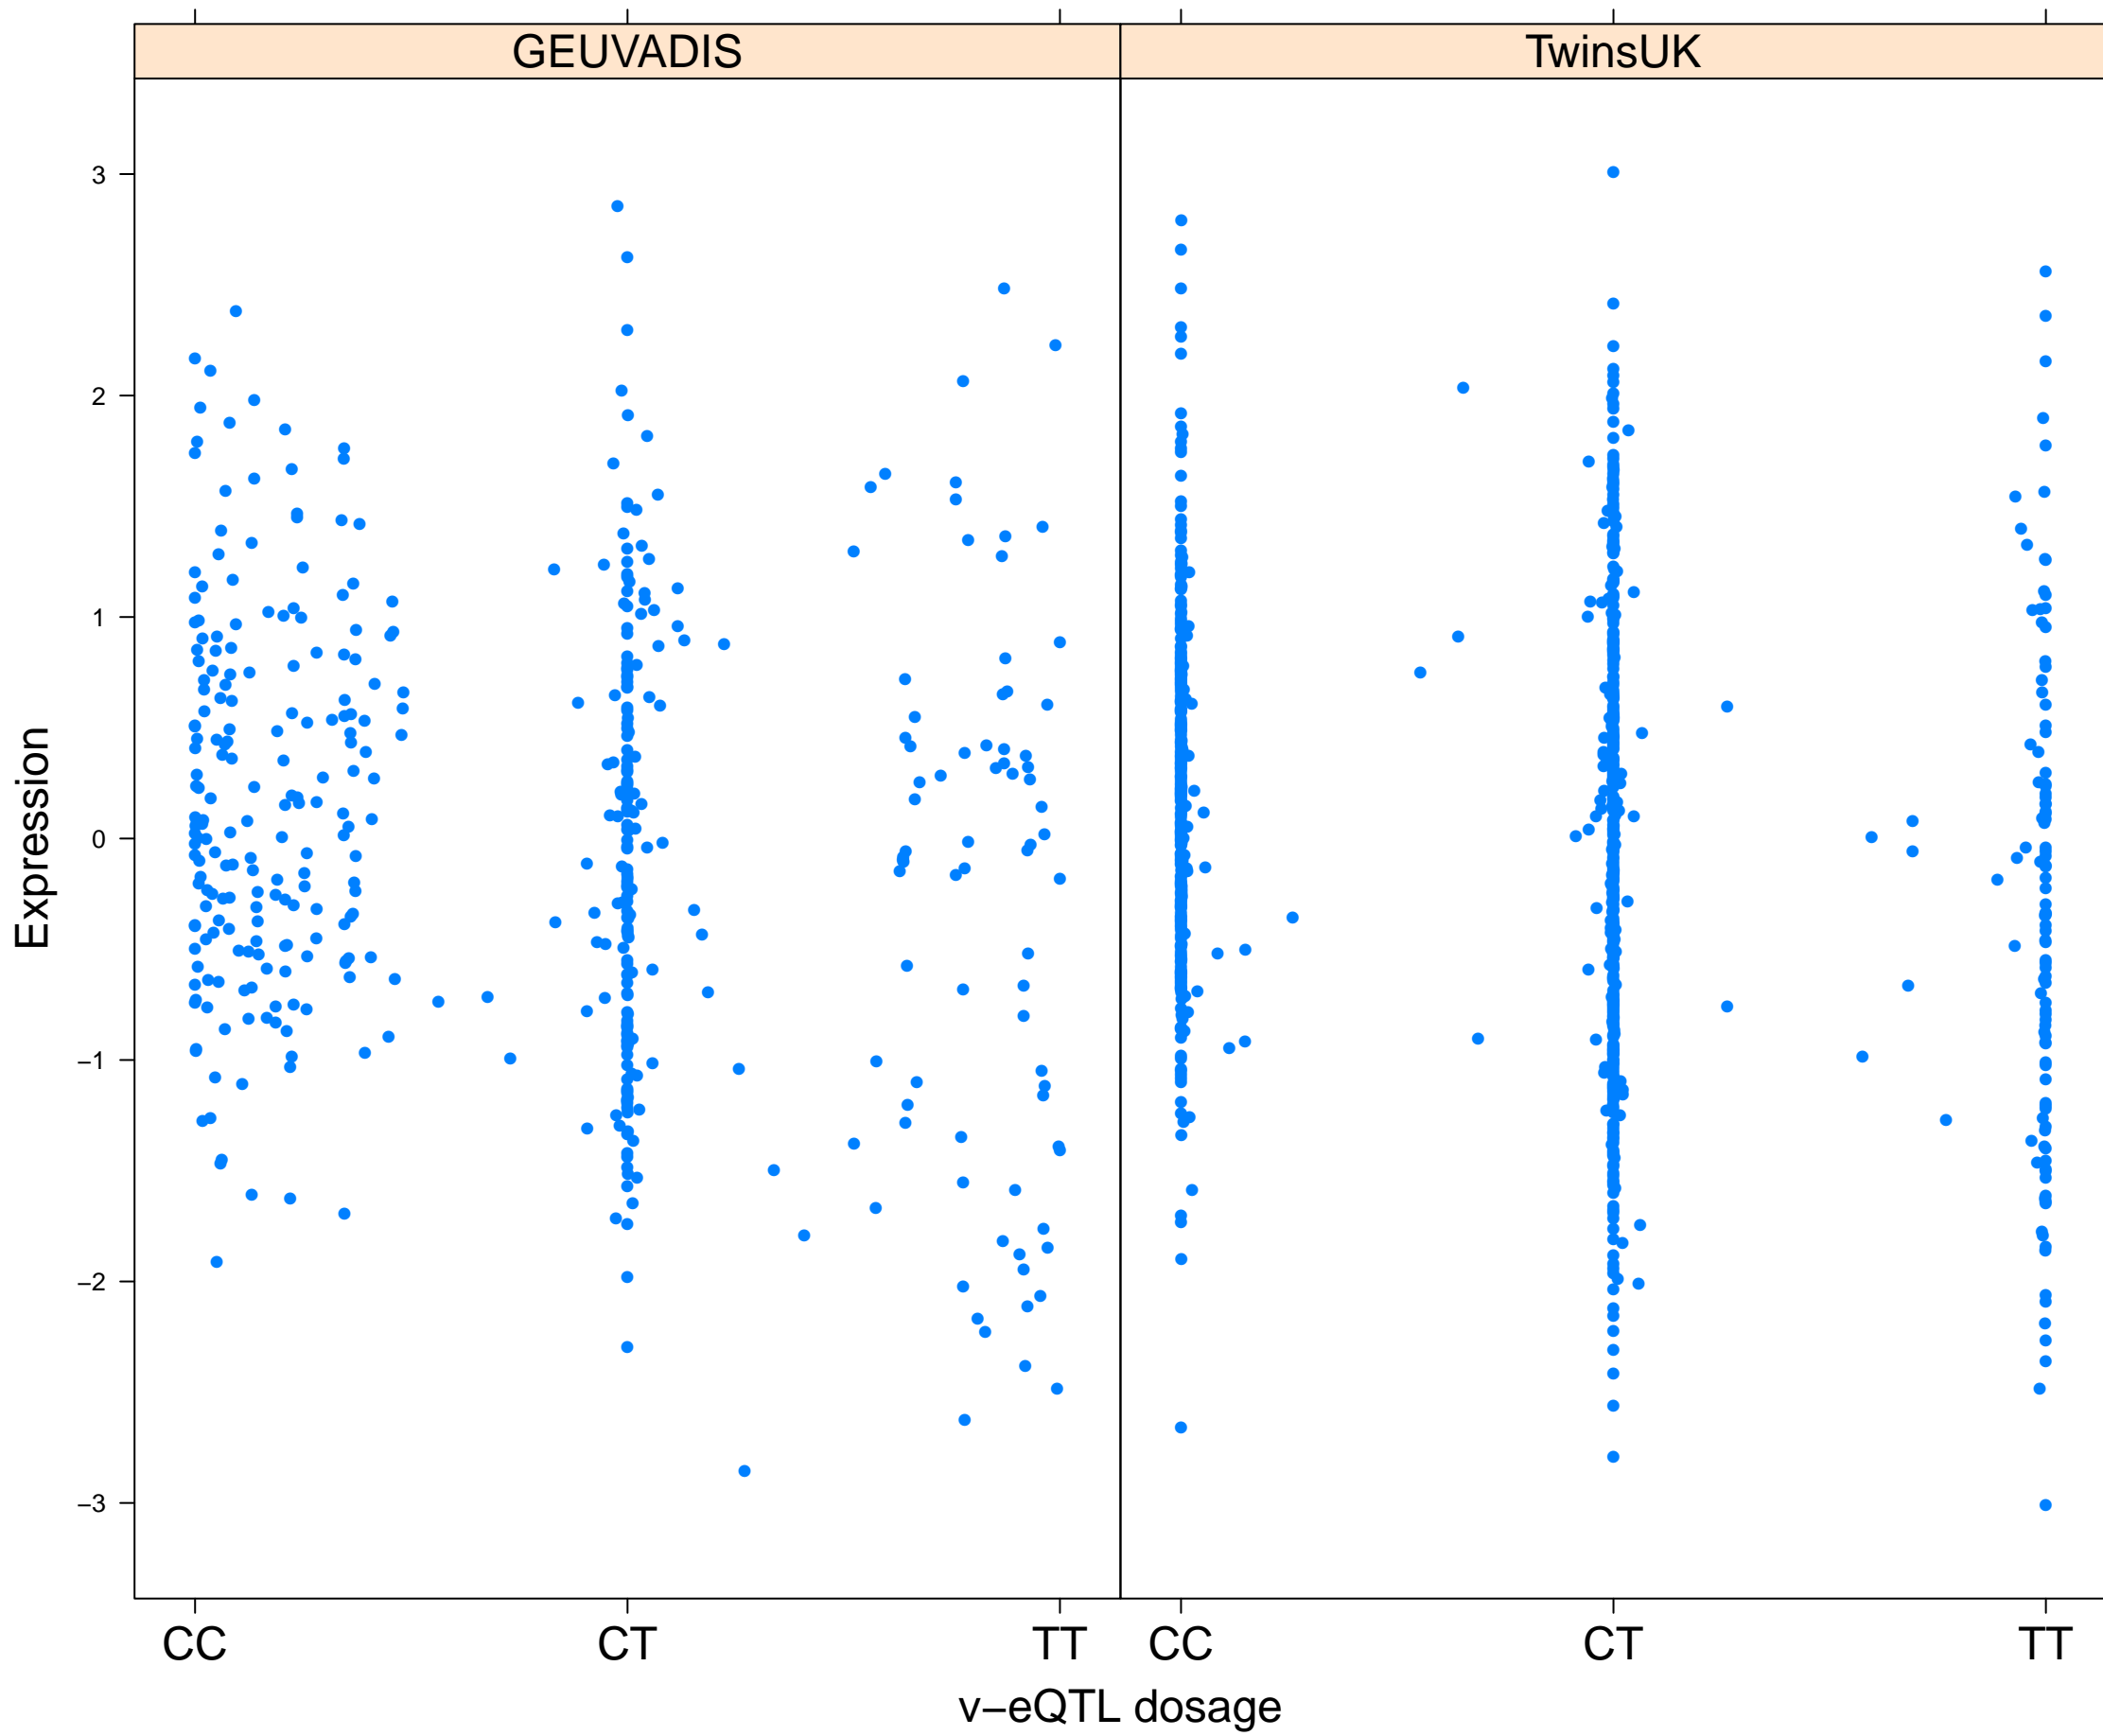

Supplement: supp [file elife_poa_e01381_Figure_1_figure_supplement_8.pdf › elife_poa_e01381_Figure_1_figure_supplement_8.pdf]

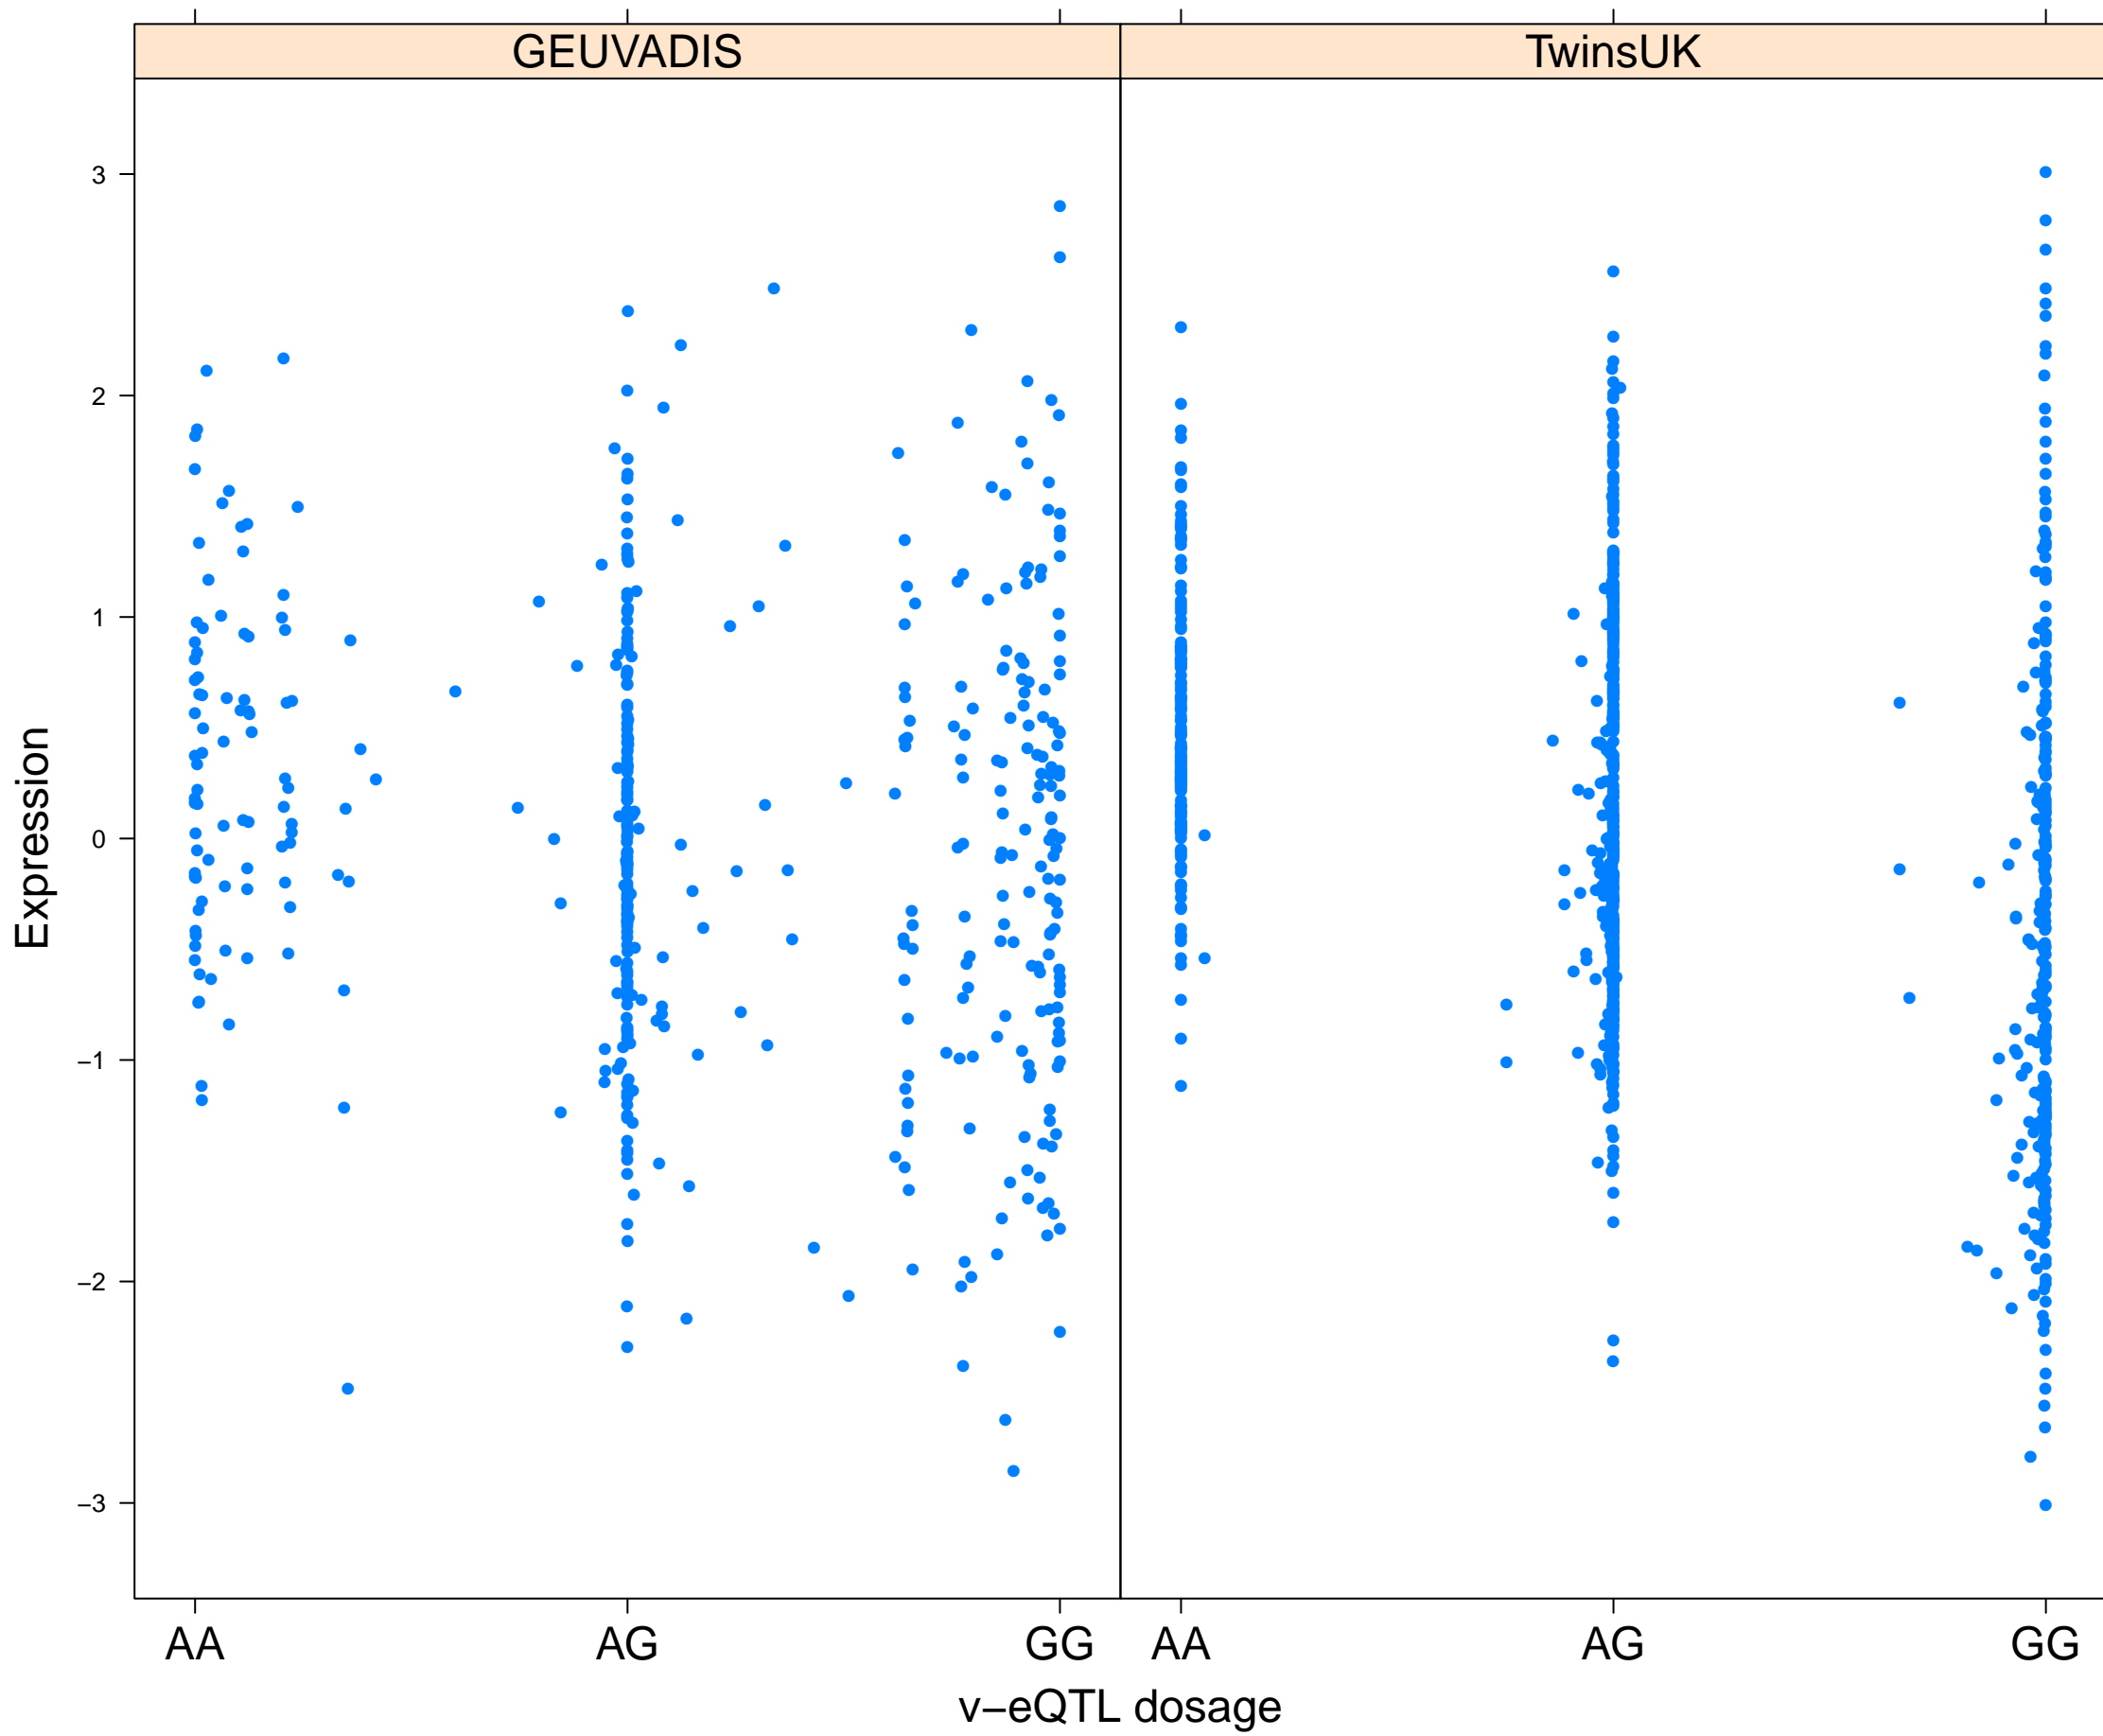

Supplement: supp [file elife_poa_e01381_Figure_1_figure_supplement_9.pdf › elife_poa_e01381_Figure_1_figure_supplement_9.pdf]

$-\log_{10}$  P value in GEUVADIS

20

15

10

5

0

10

20

30

40

50

60

70

$-\log_{10}$  P value in TwinsUK

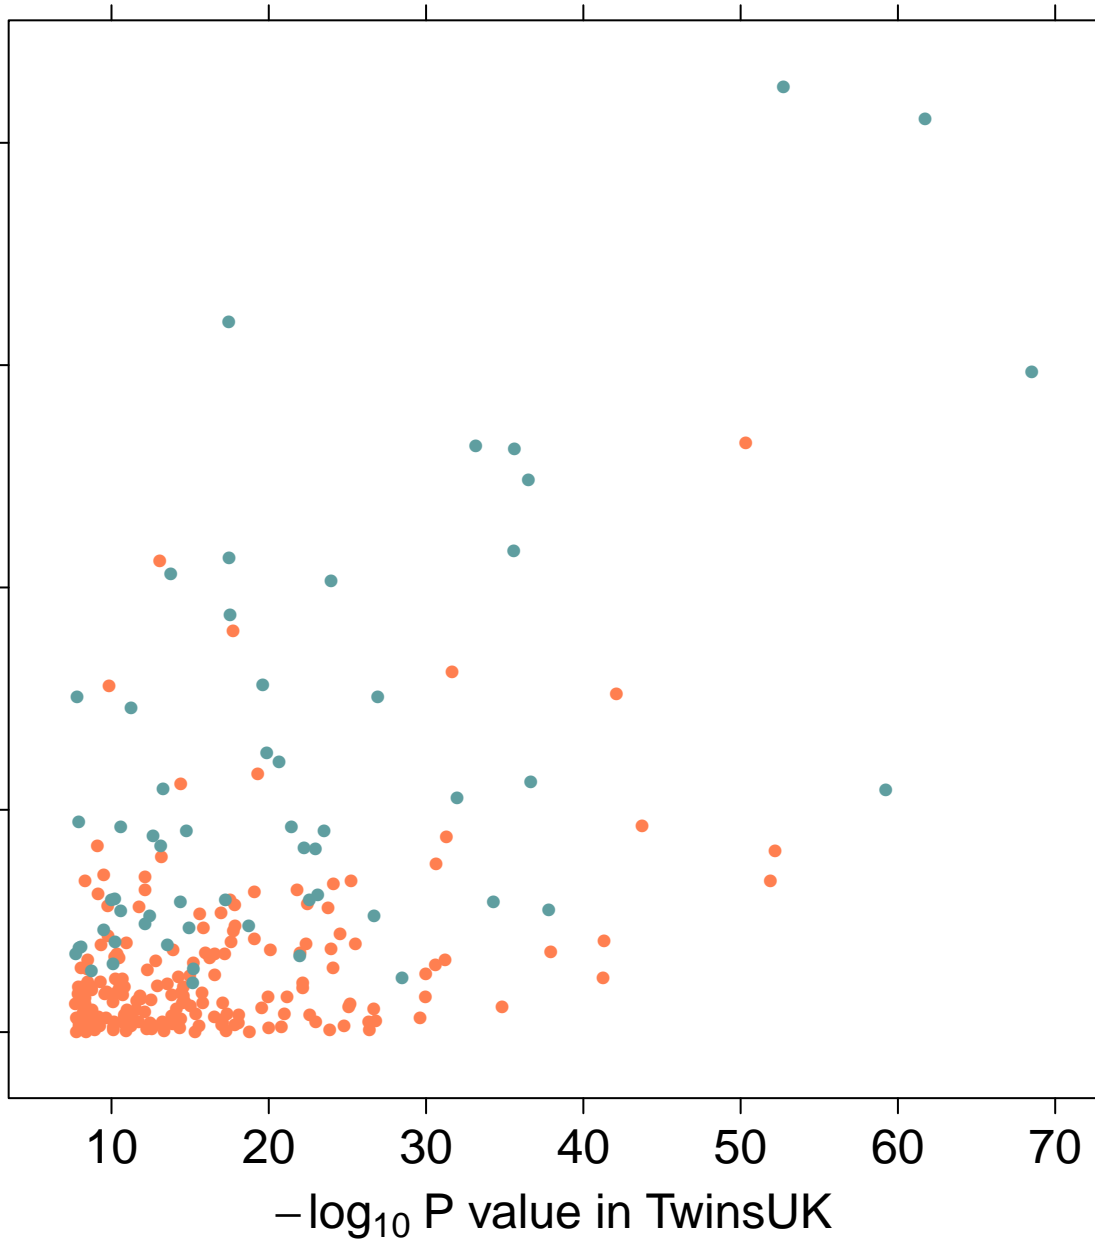

Supplement: supp [file elife_poa_e01381_Figure_2_figure_supplement_1.pdf › elife_poa_e01381_Figure_2_figure_supplement_1.pdf]

v-eQTL genotype group

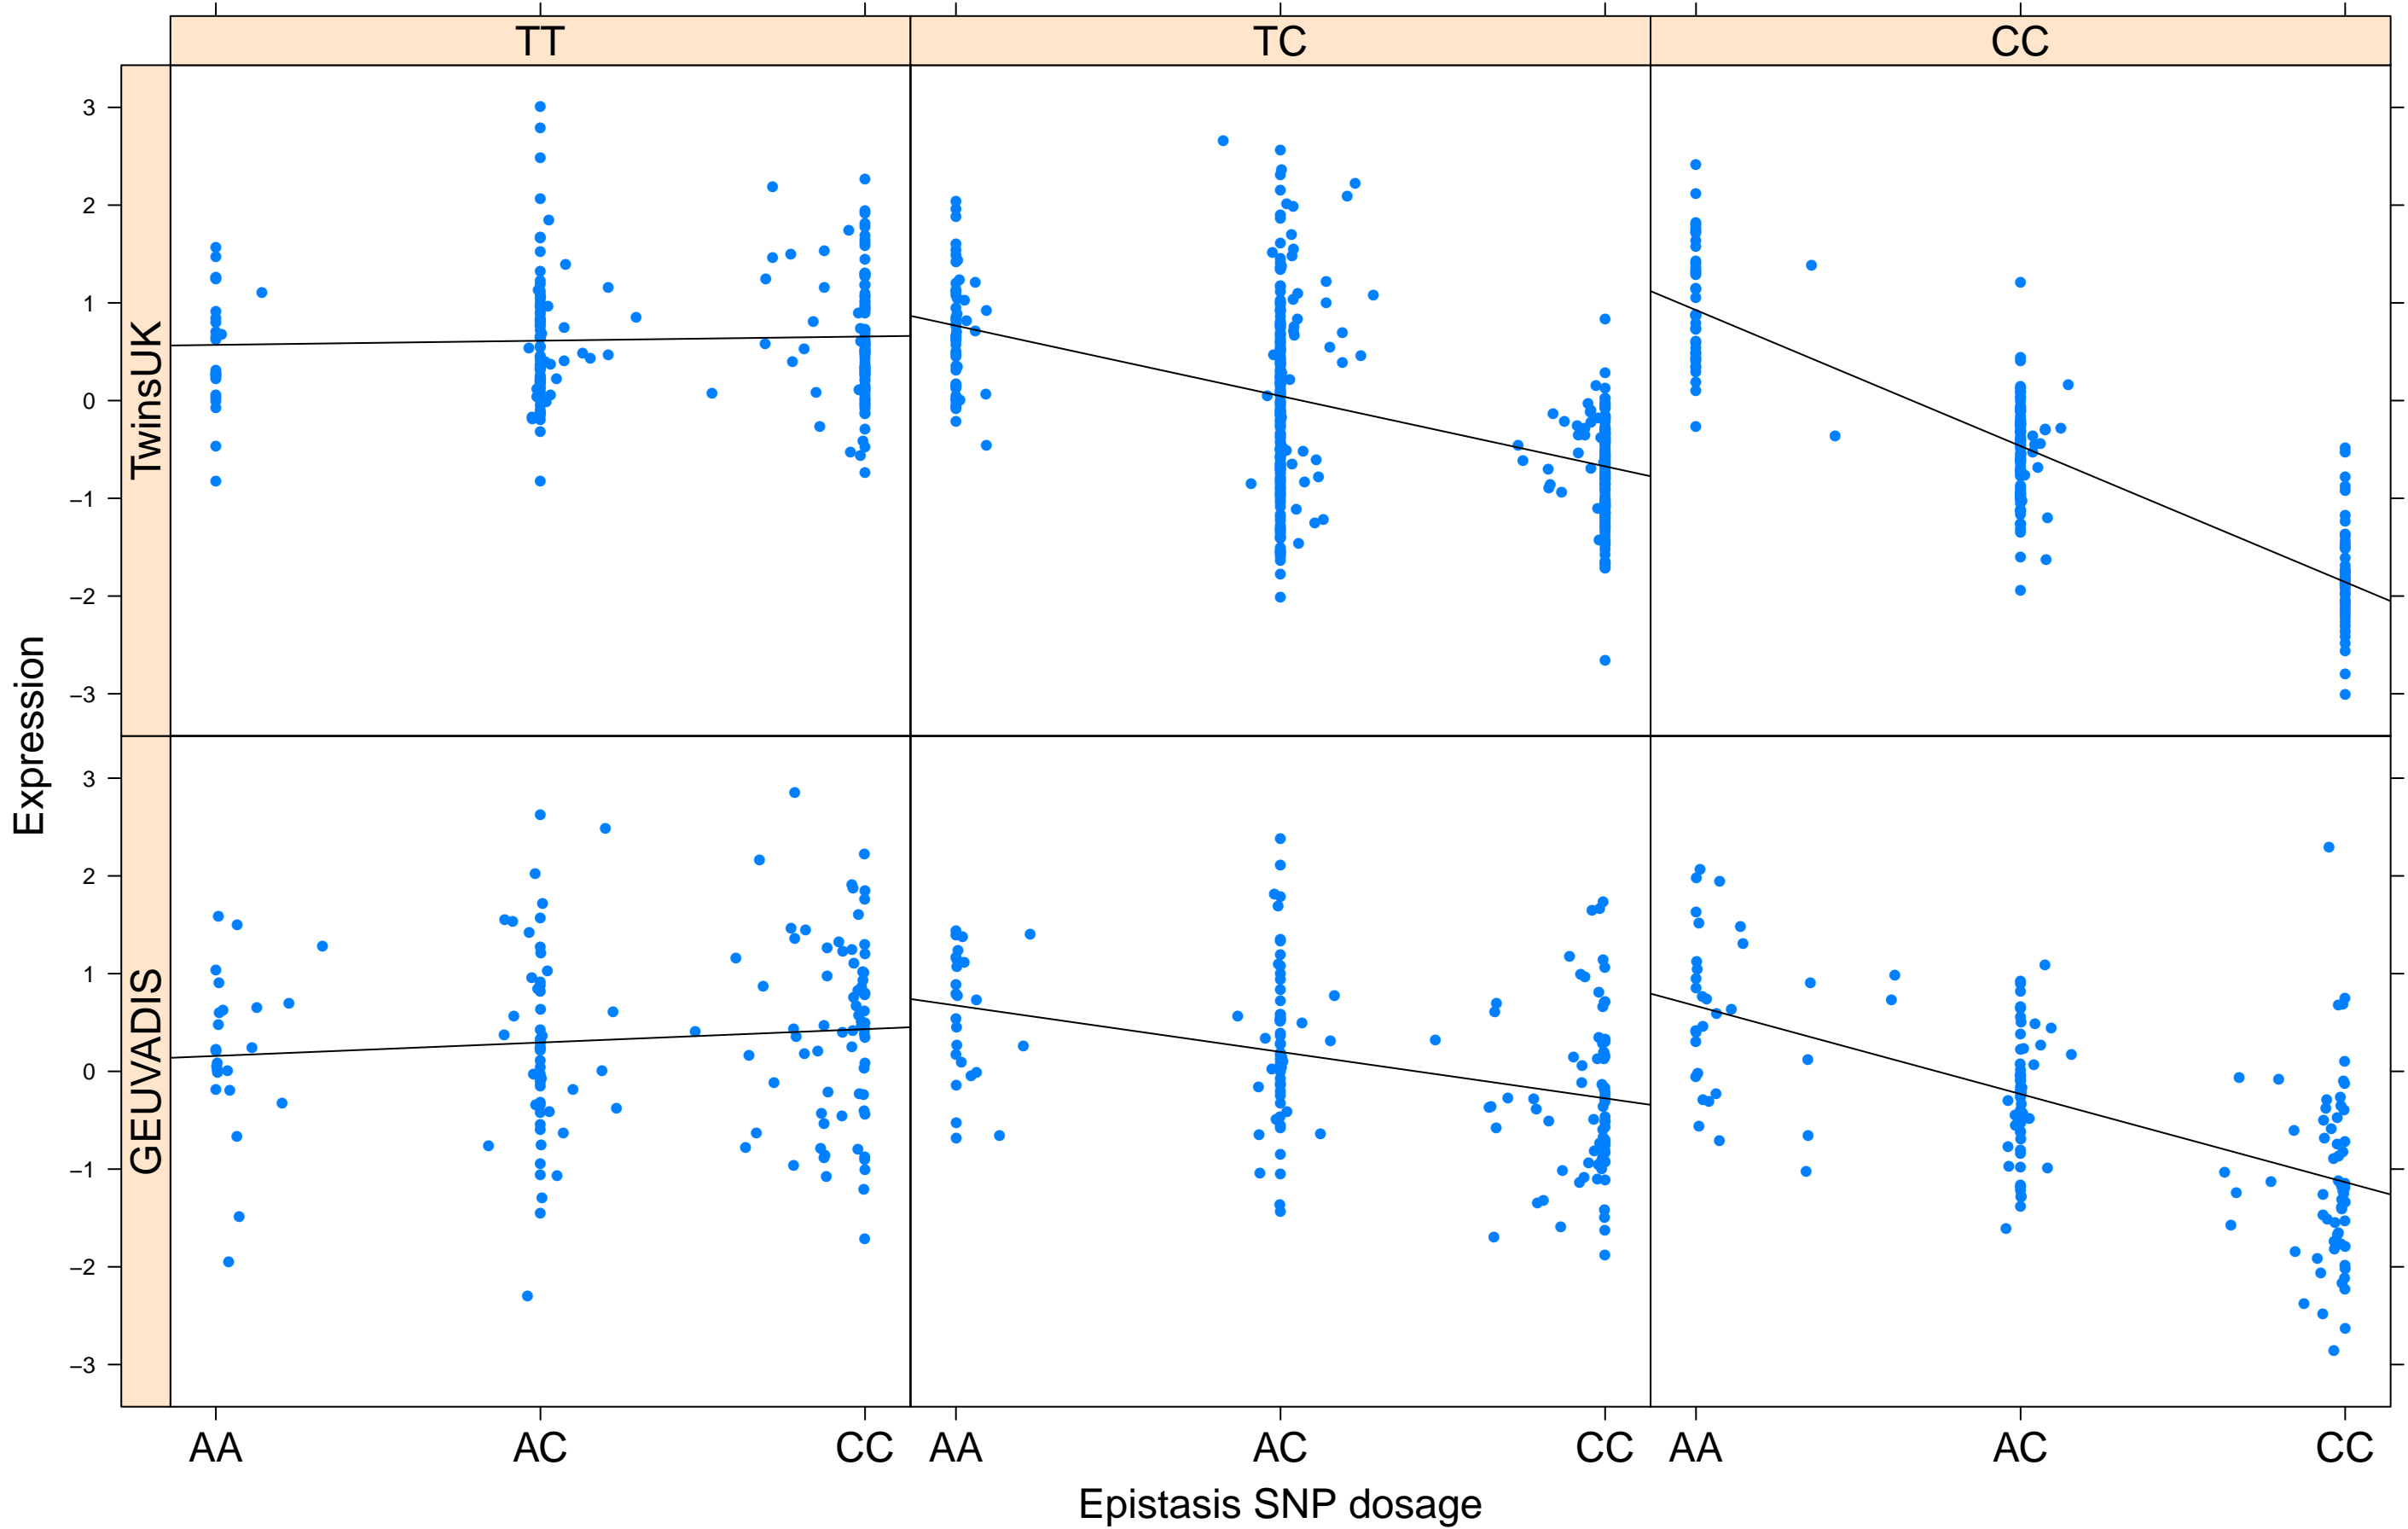

Supplement: supp [file elife_poa_e01381_Figure_2_figure_supplement_10.pdf › elife_poa_e01381_Figure_2_figure_supplement_10.pdf]

v-eQTL genotype group

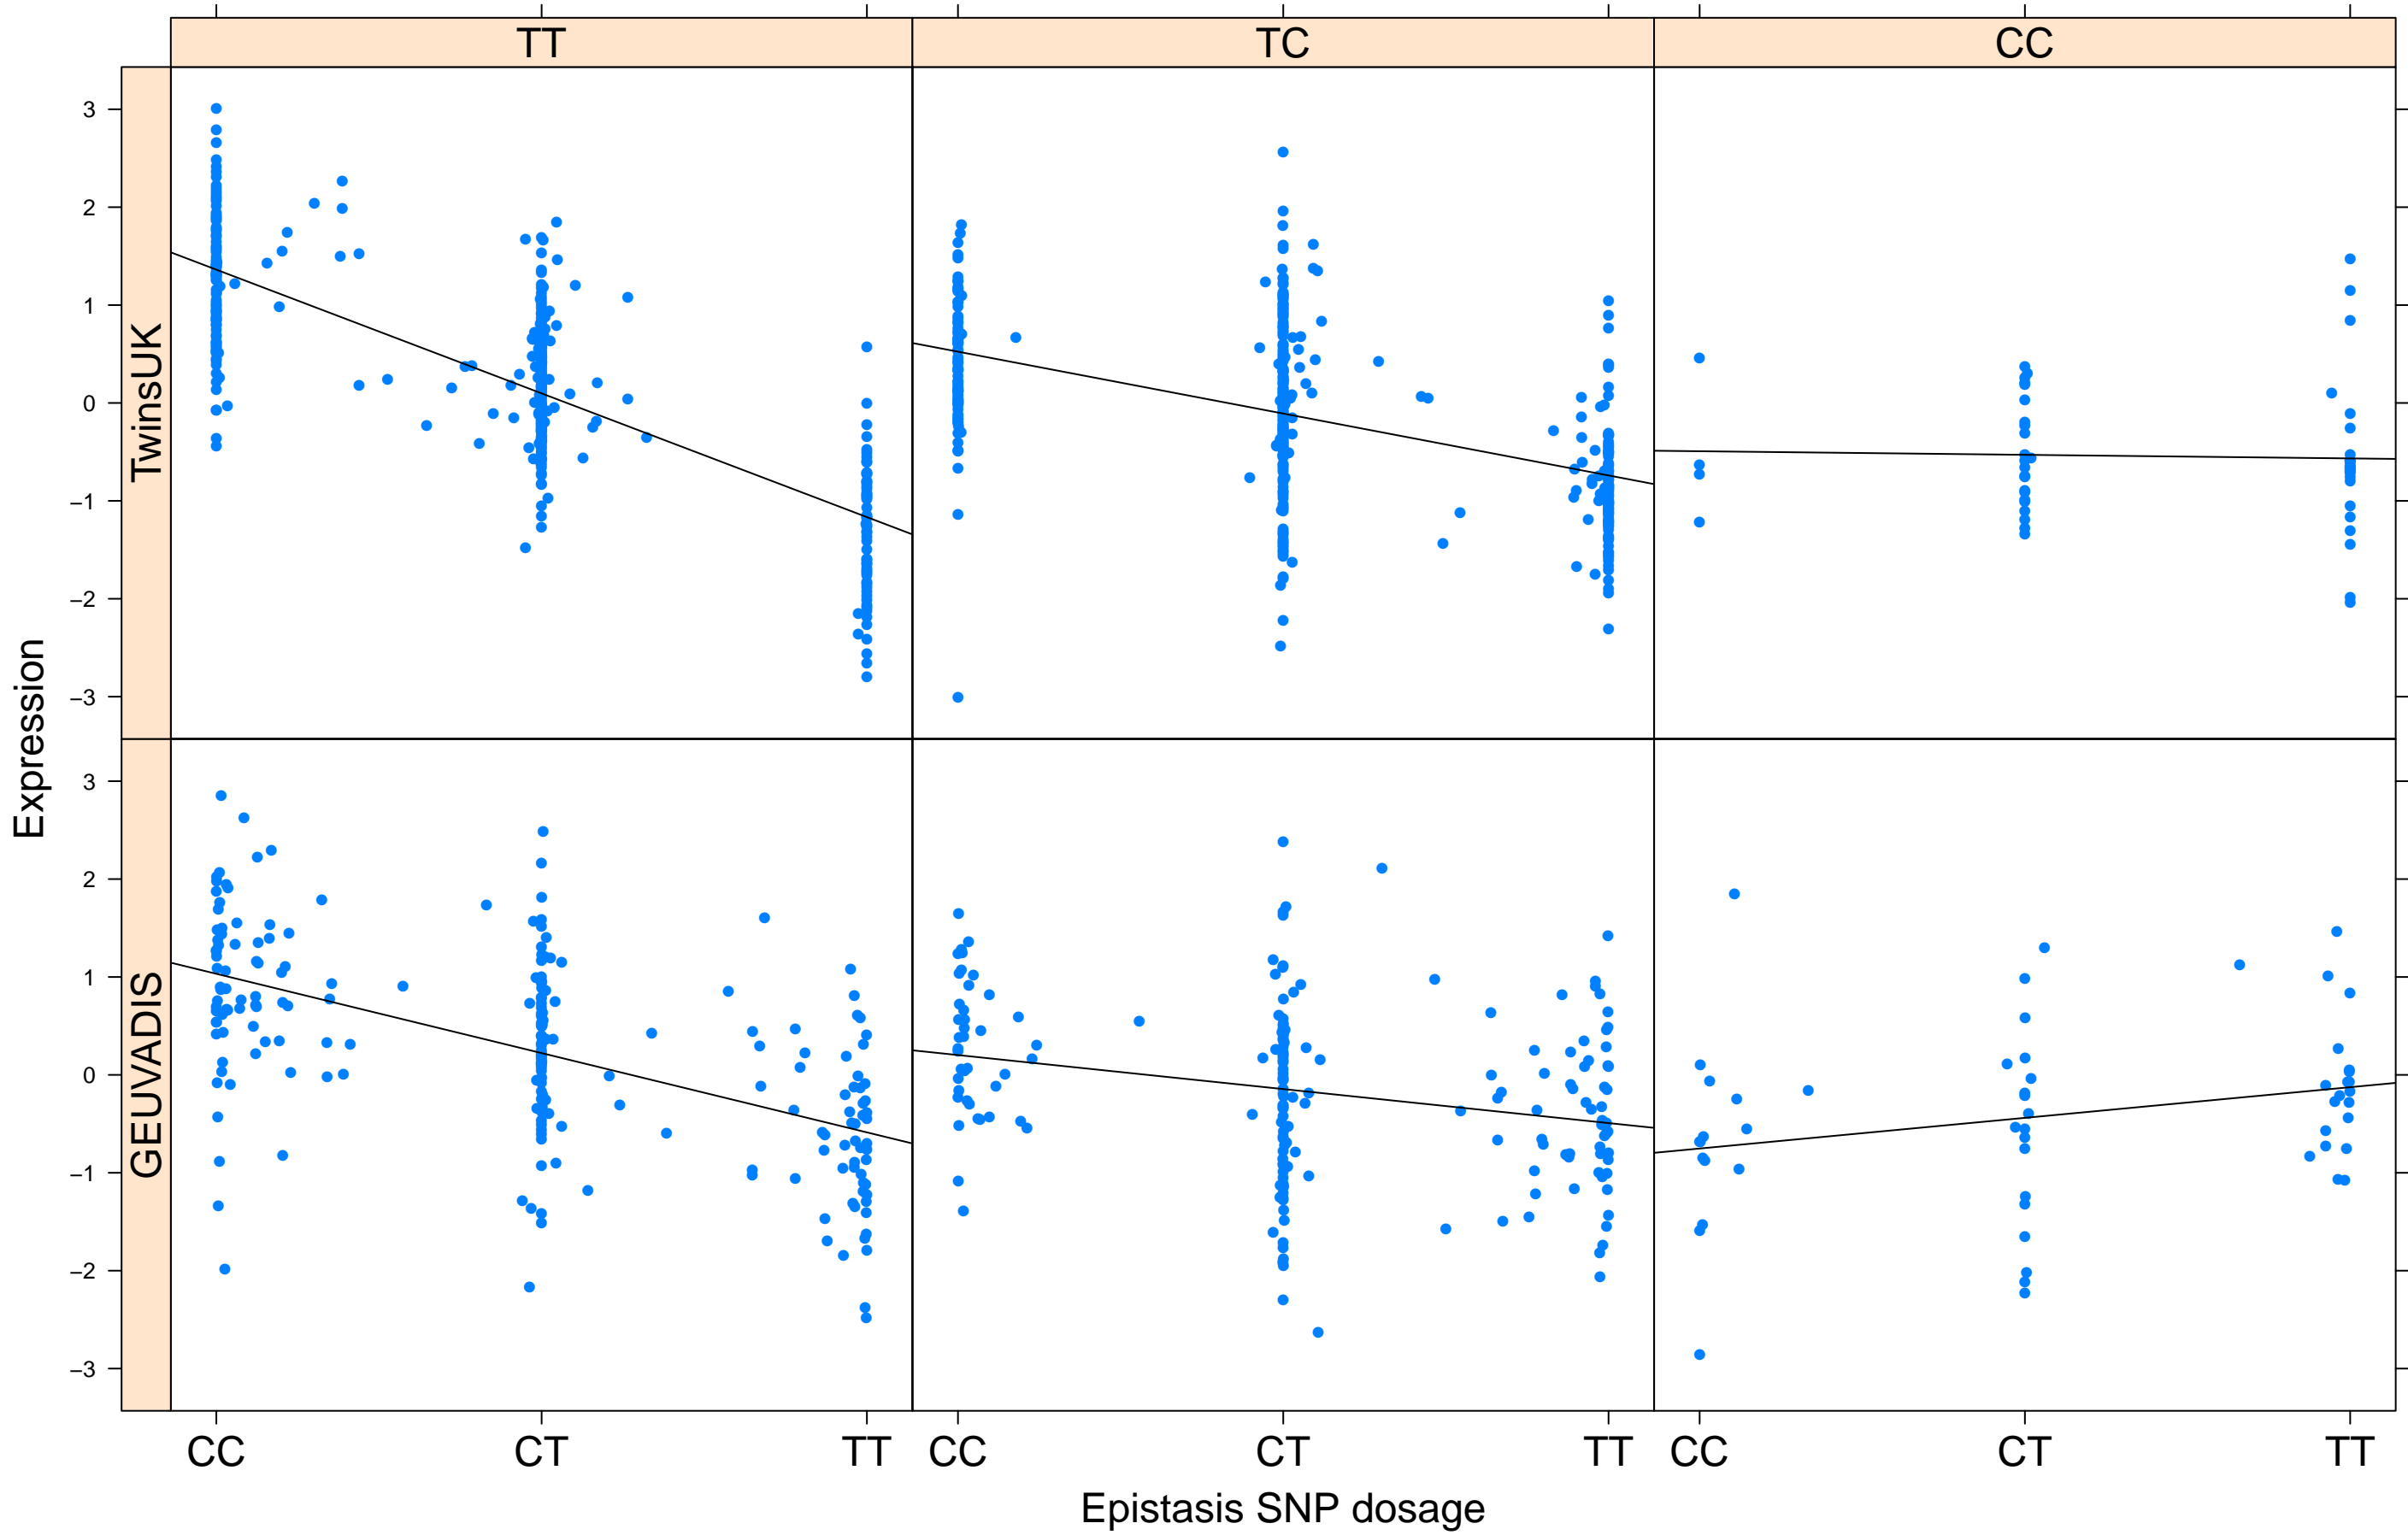

Supplement: supp [file elife_poa_e01381_Figure_2_figure_supplement_11.pdf › elife_poa_e01381_Figure_2_figure_supplement_11.pdf]

v-eQTL genotype group

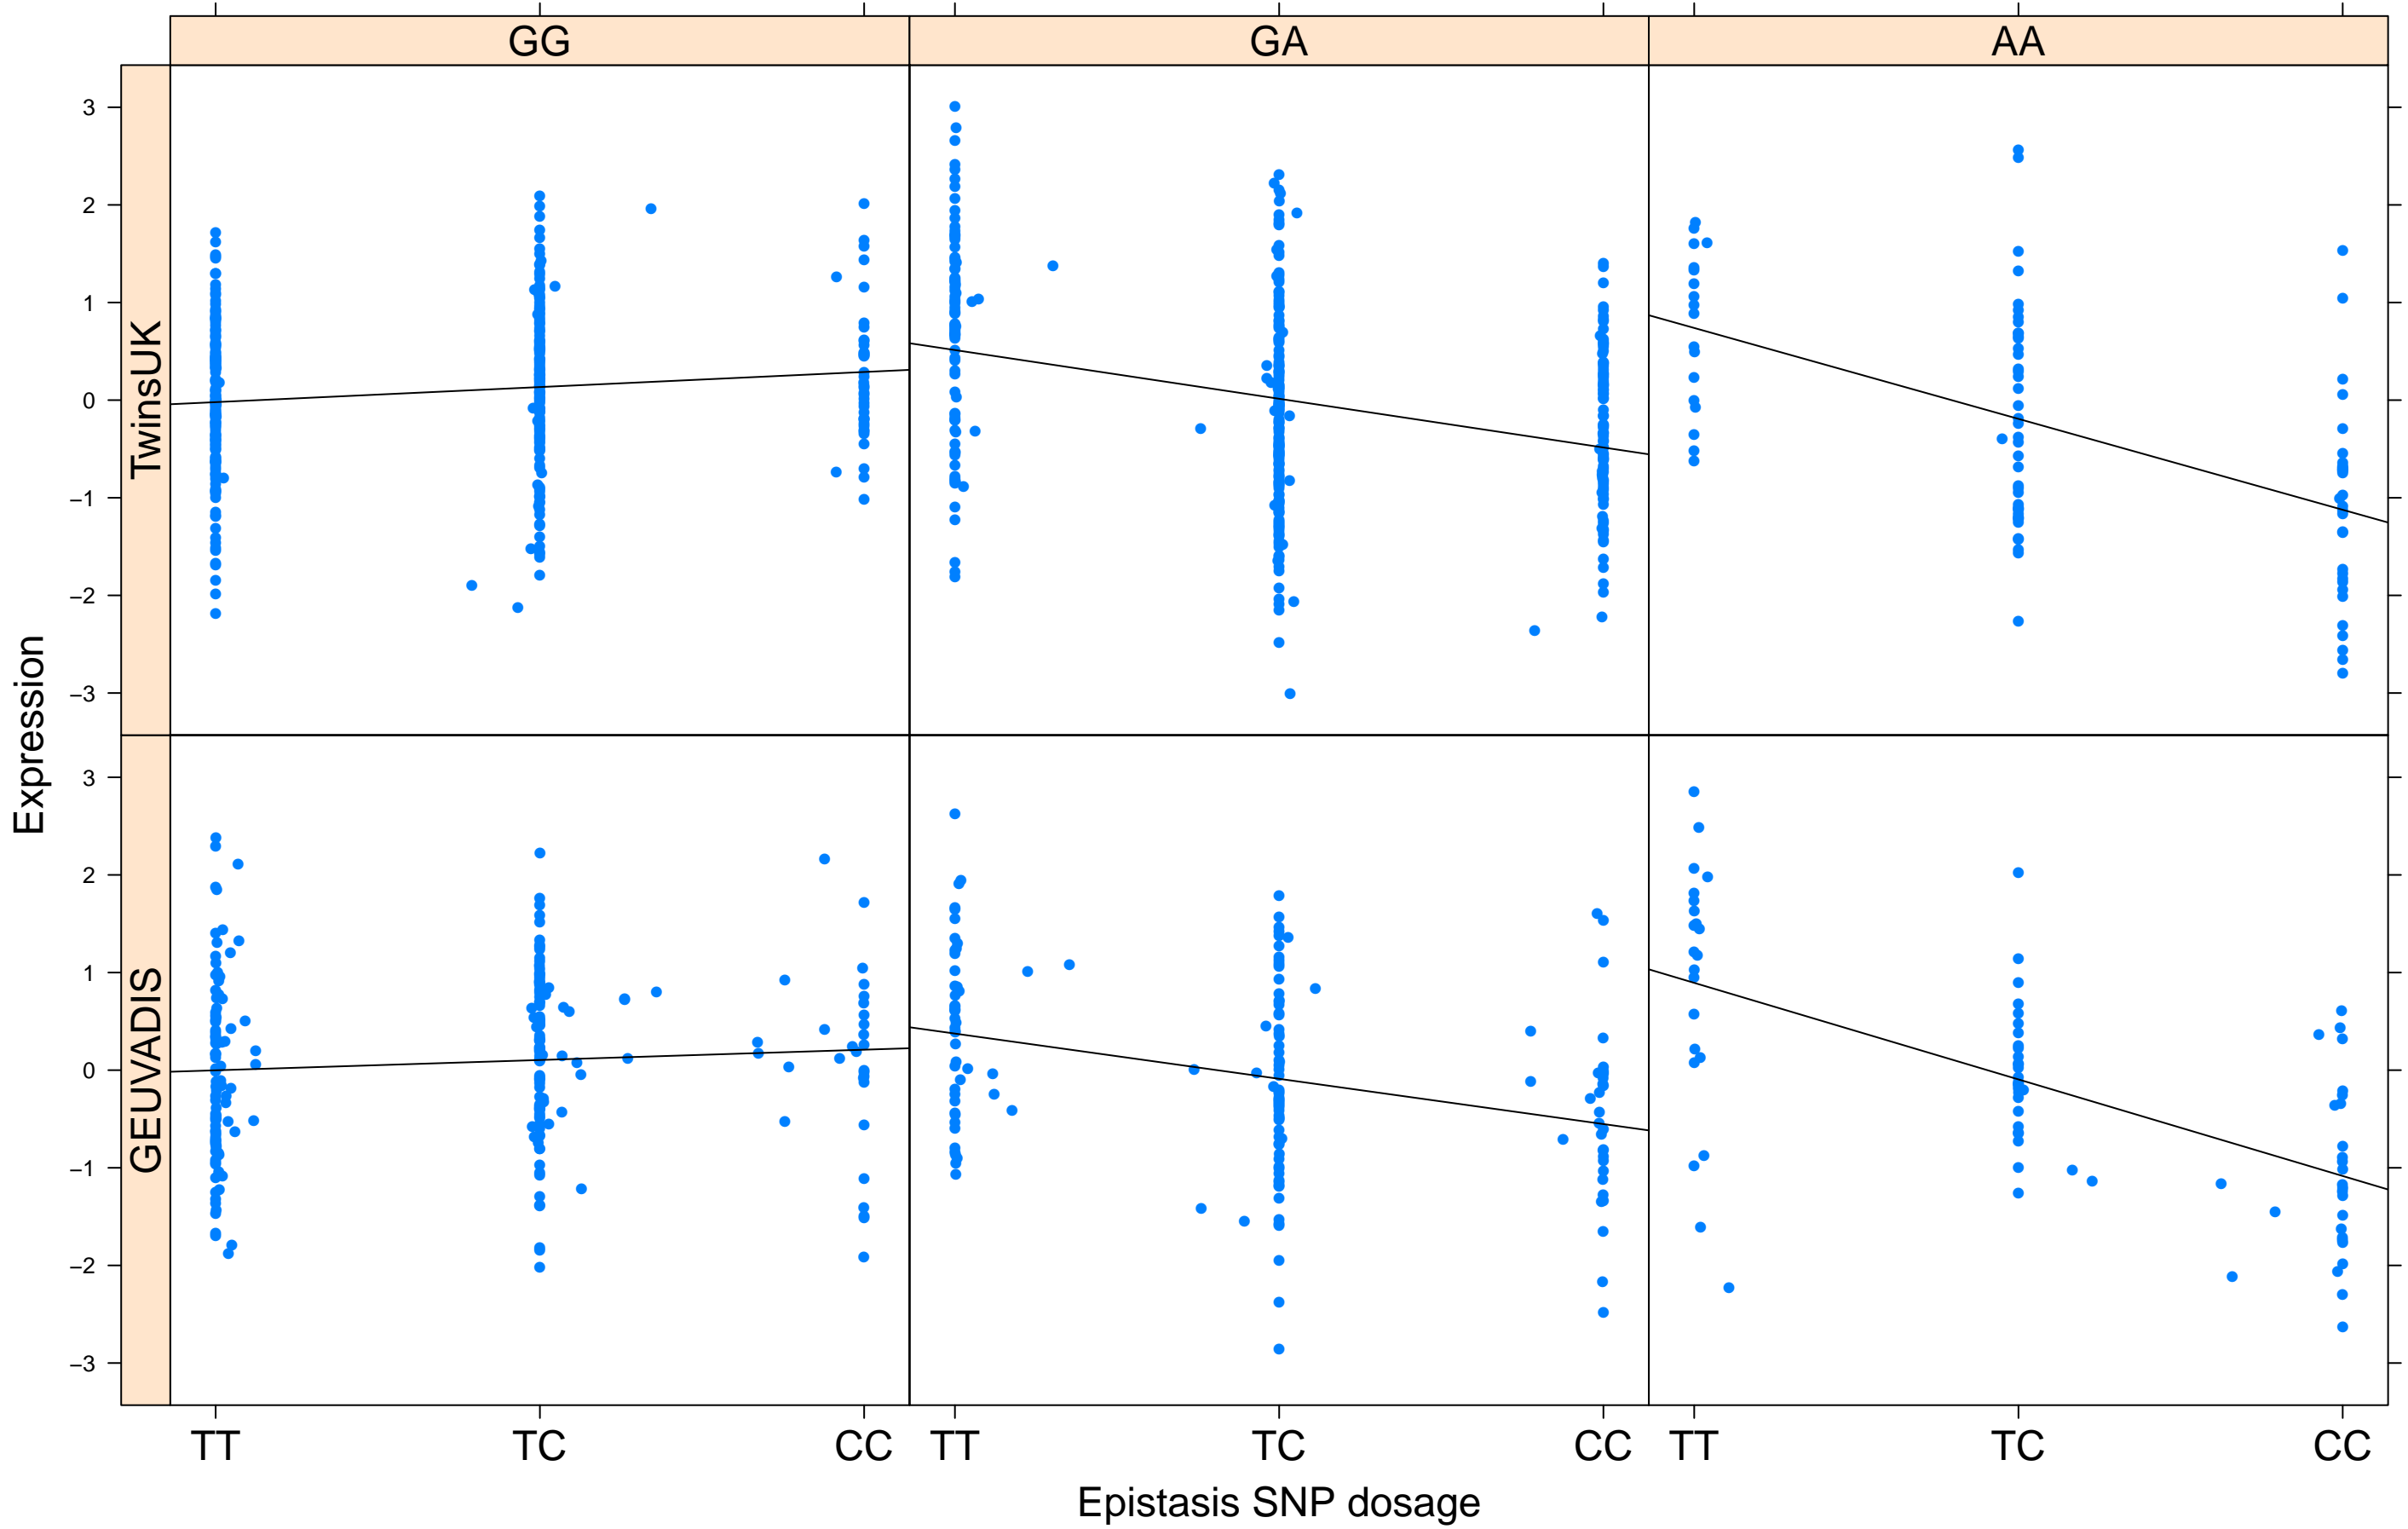

Supplement: supp [file elife_poa_e01381_Figure_2_figure_supplement_12.pdf › elife_poa_e01381_Figure_2_figure_supplement_12.pdf]

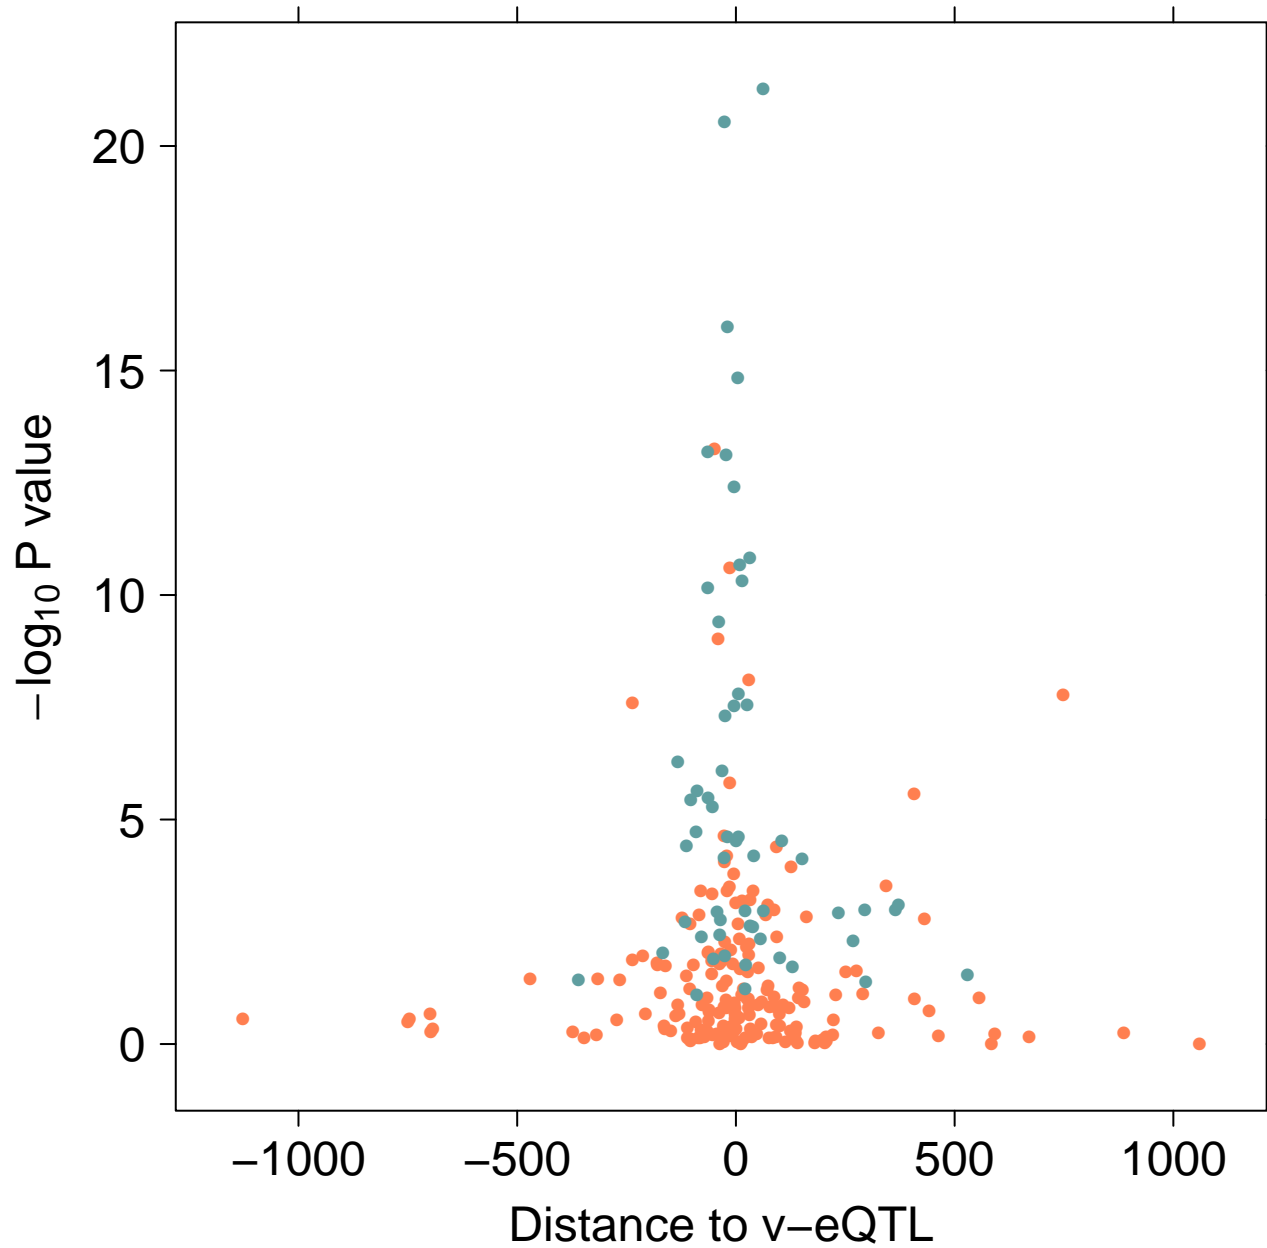

Supplement: supp [file elife_poa_e01381_Figure_2_figure_supplement_13.pdf › elife_poa_e01381_Figure_2_figure_supplement_13.pdf]

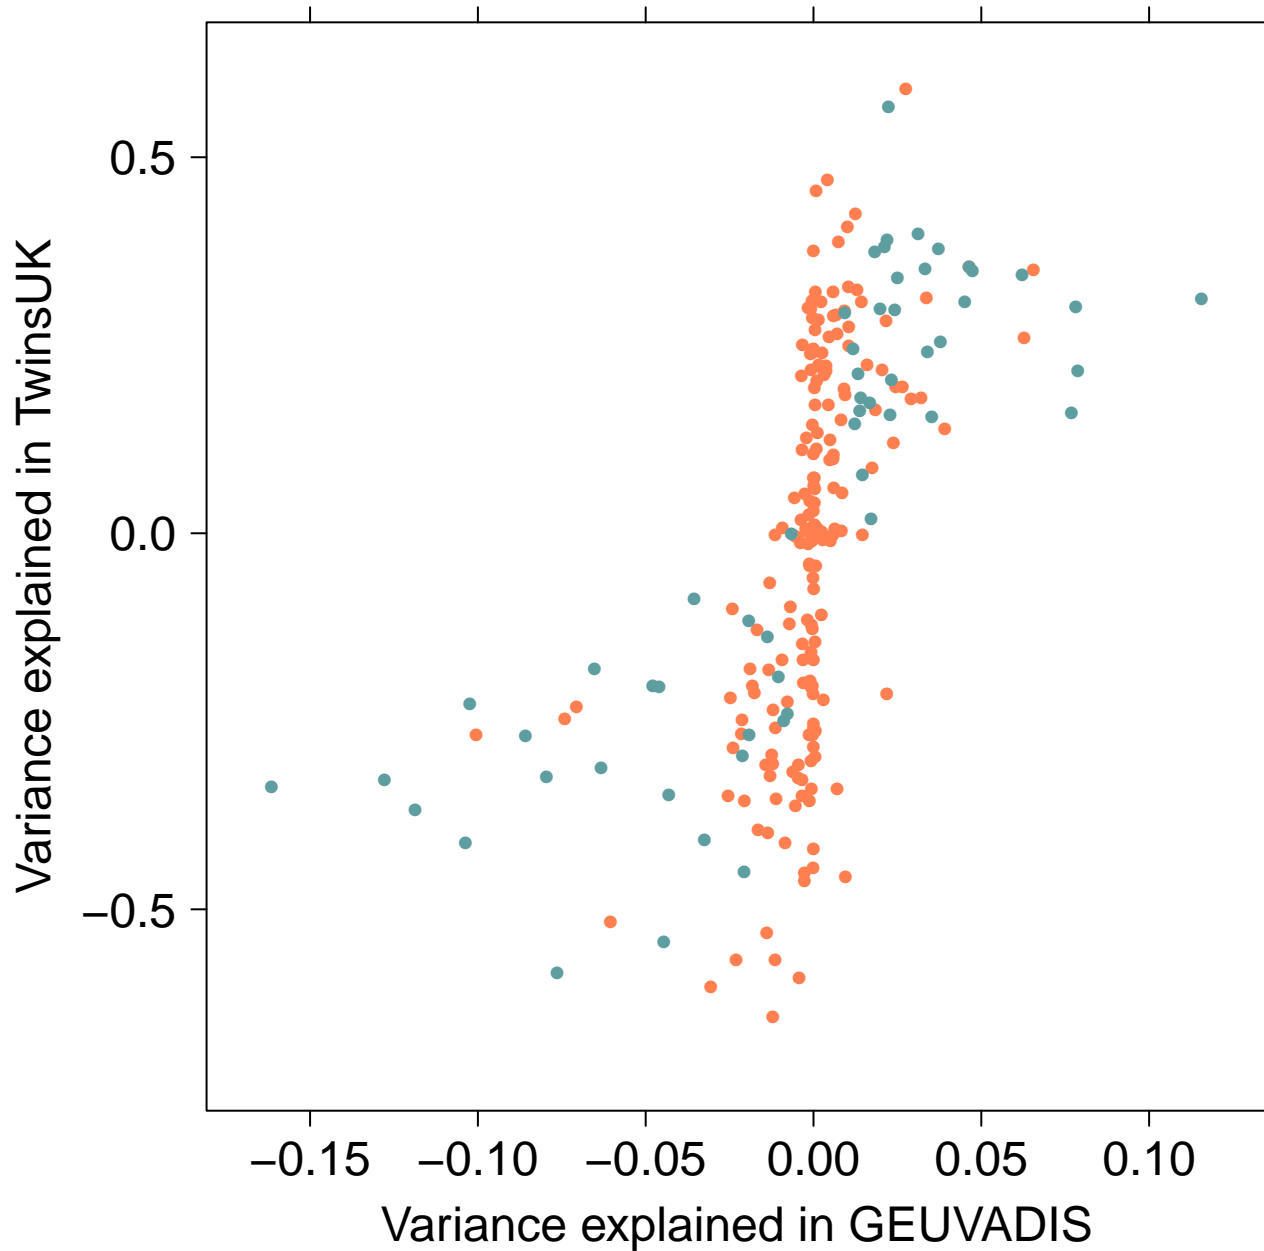

Supplement: supp [file elife_poa_e01381_Figure_2_figure_supplement_2.pdf › elife_poa_e01381_Figure_2_figure_supplement_2.pdf]

v-eQTL genotype group

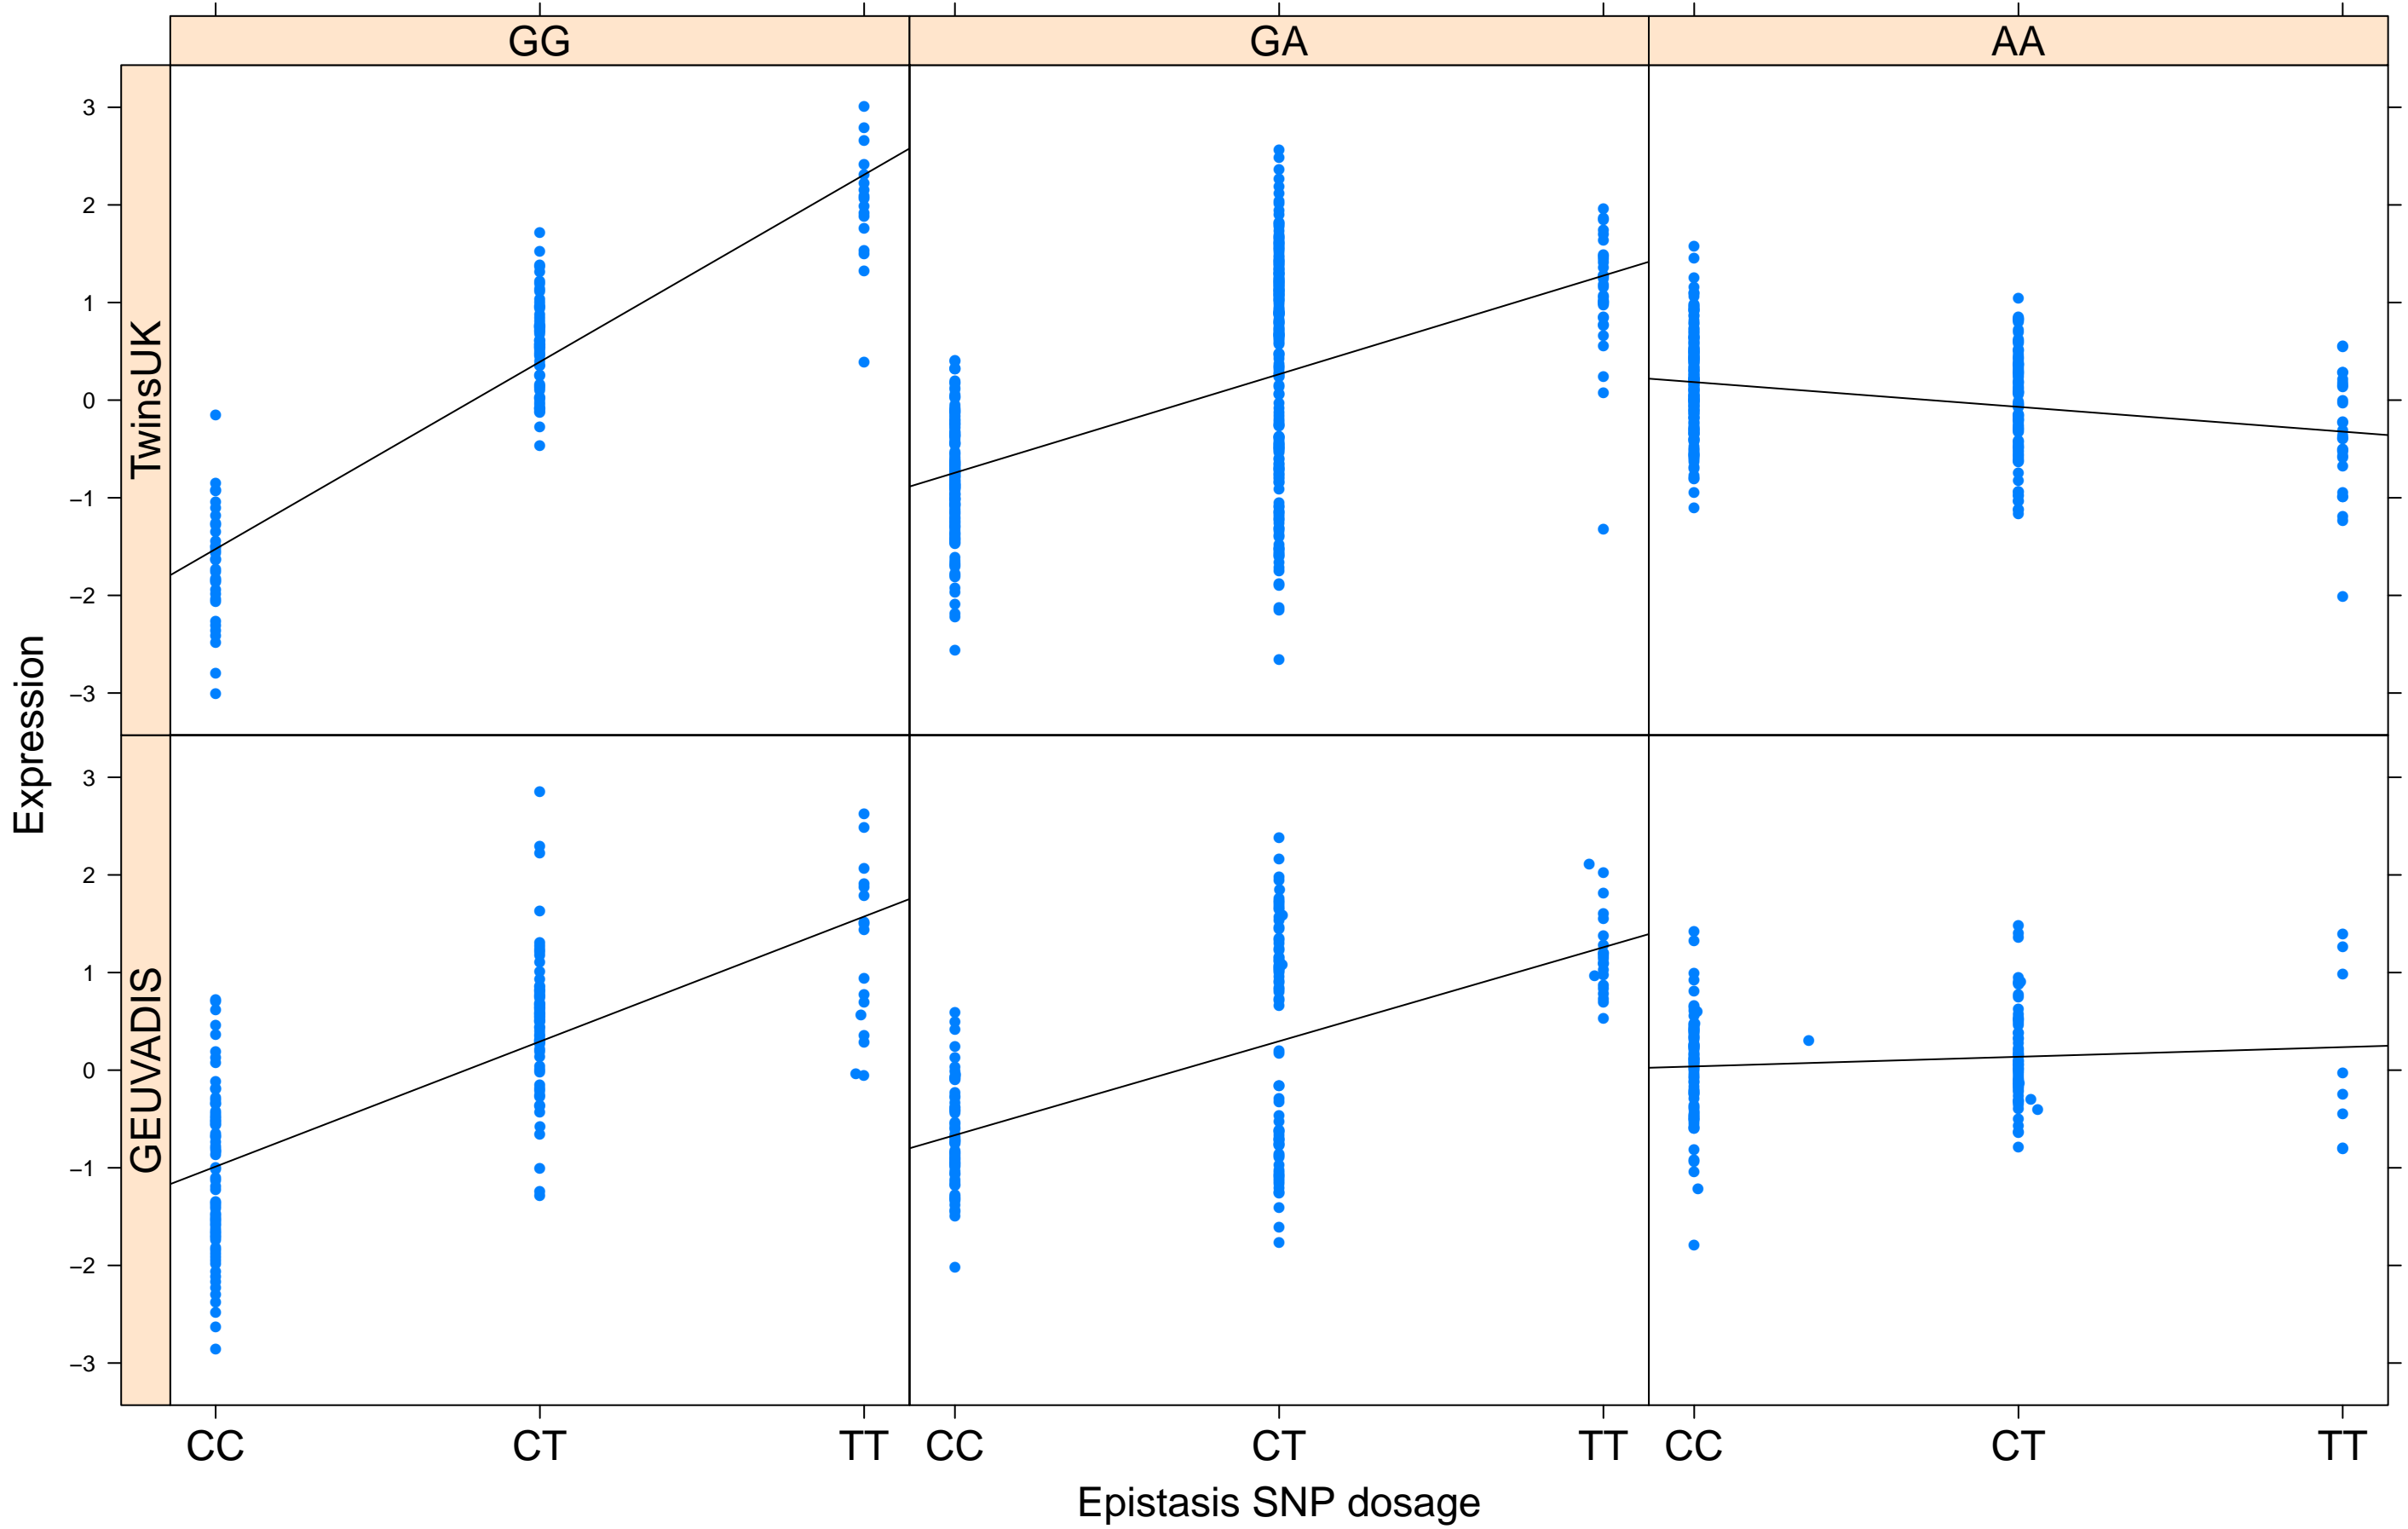

Supplement: supp [file elife_poa_e01381_Figure_2_figure_supplement_3.pdf › elife_poa_e01381_Figure_2_figure_supplement_3.pdf]

v-eQTL genotype group

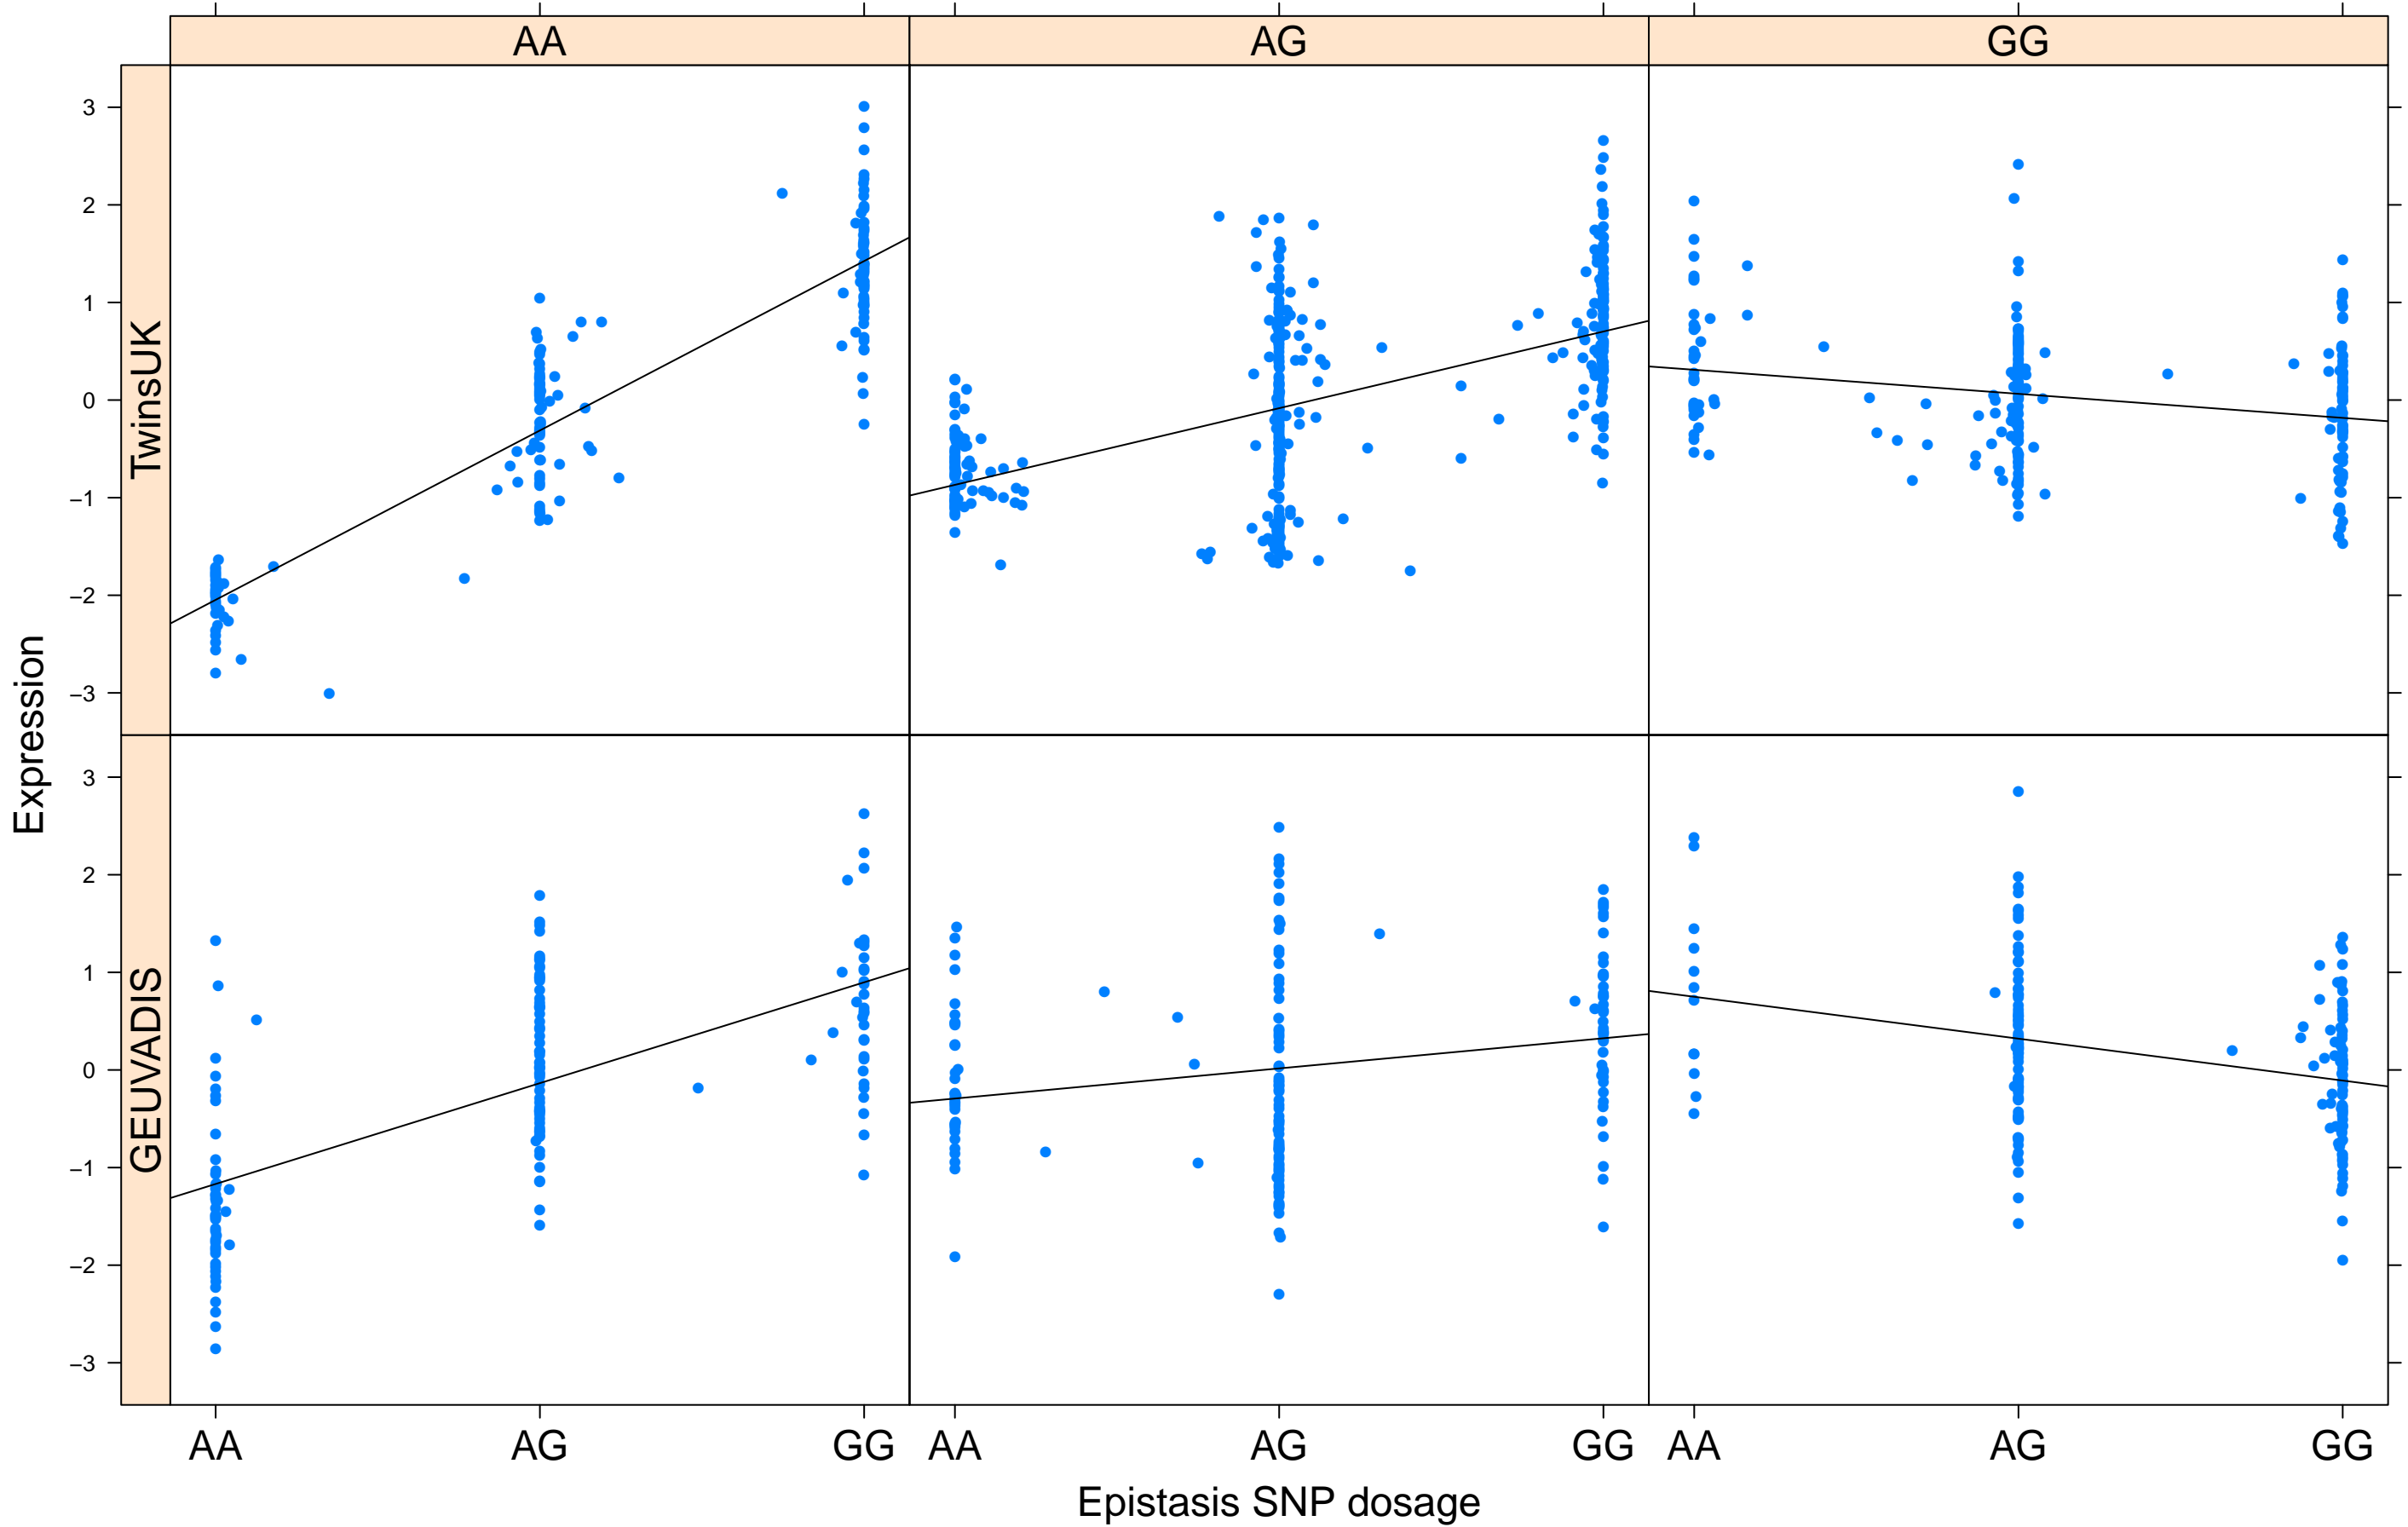

Supplement: supp [file elife_poa_e01381_Figure_2_figure_supplement_4.pdf › elife_poa_e01381_Figure_2_figure_supplement_4.pdf]

v-eQTL genotype group

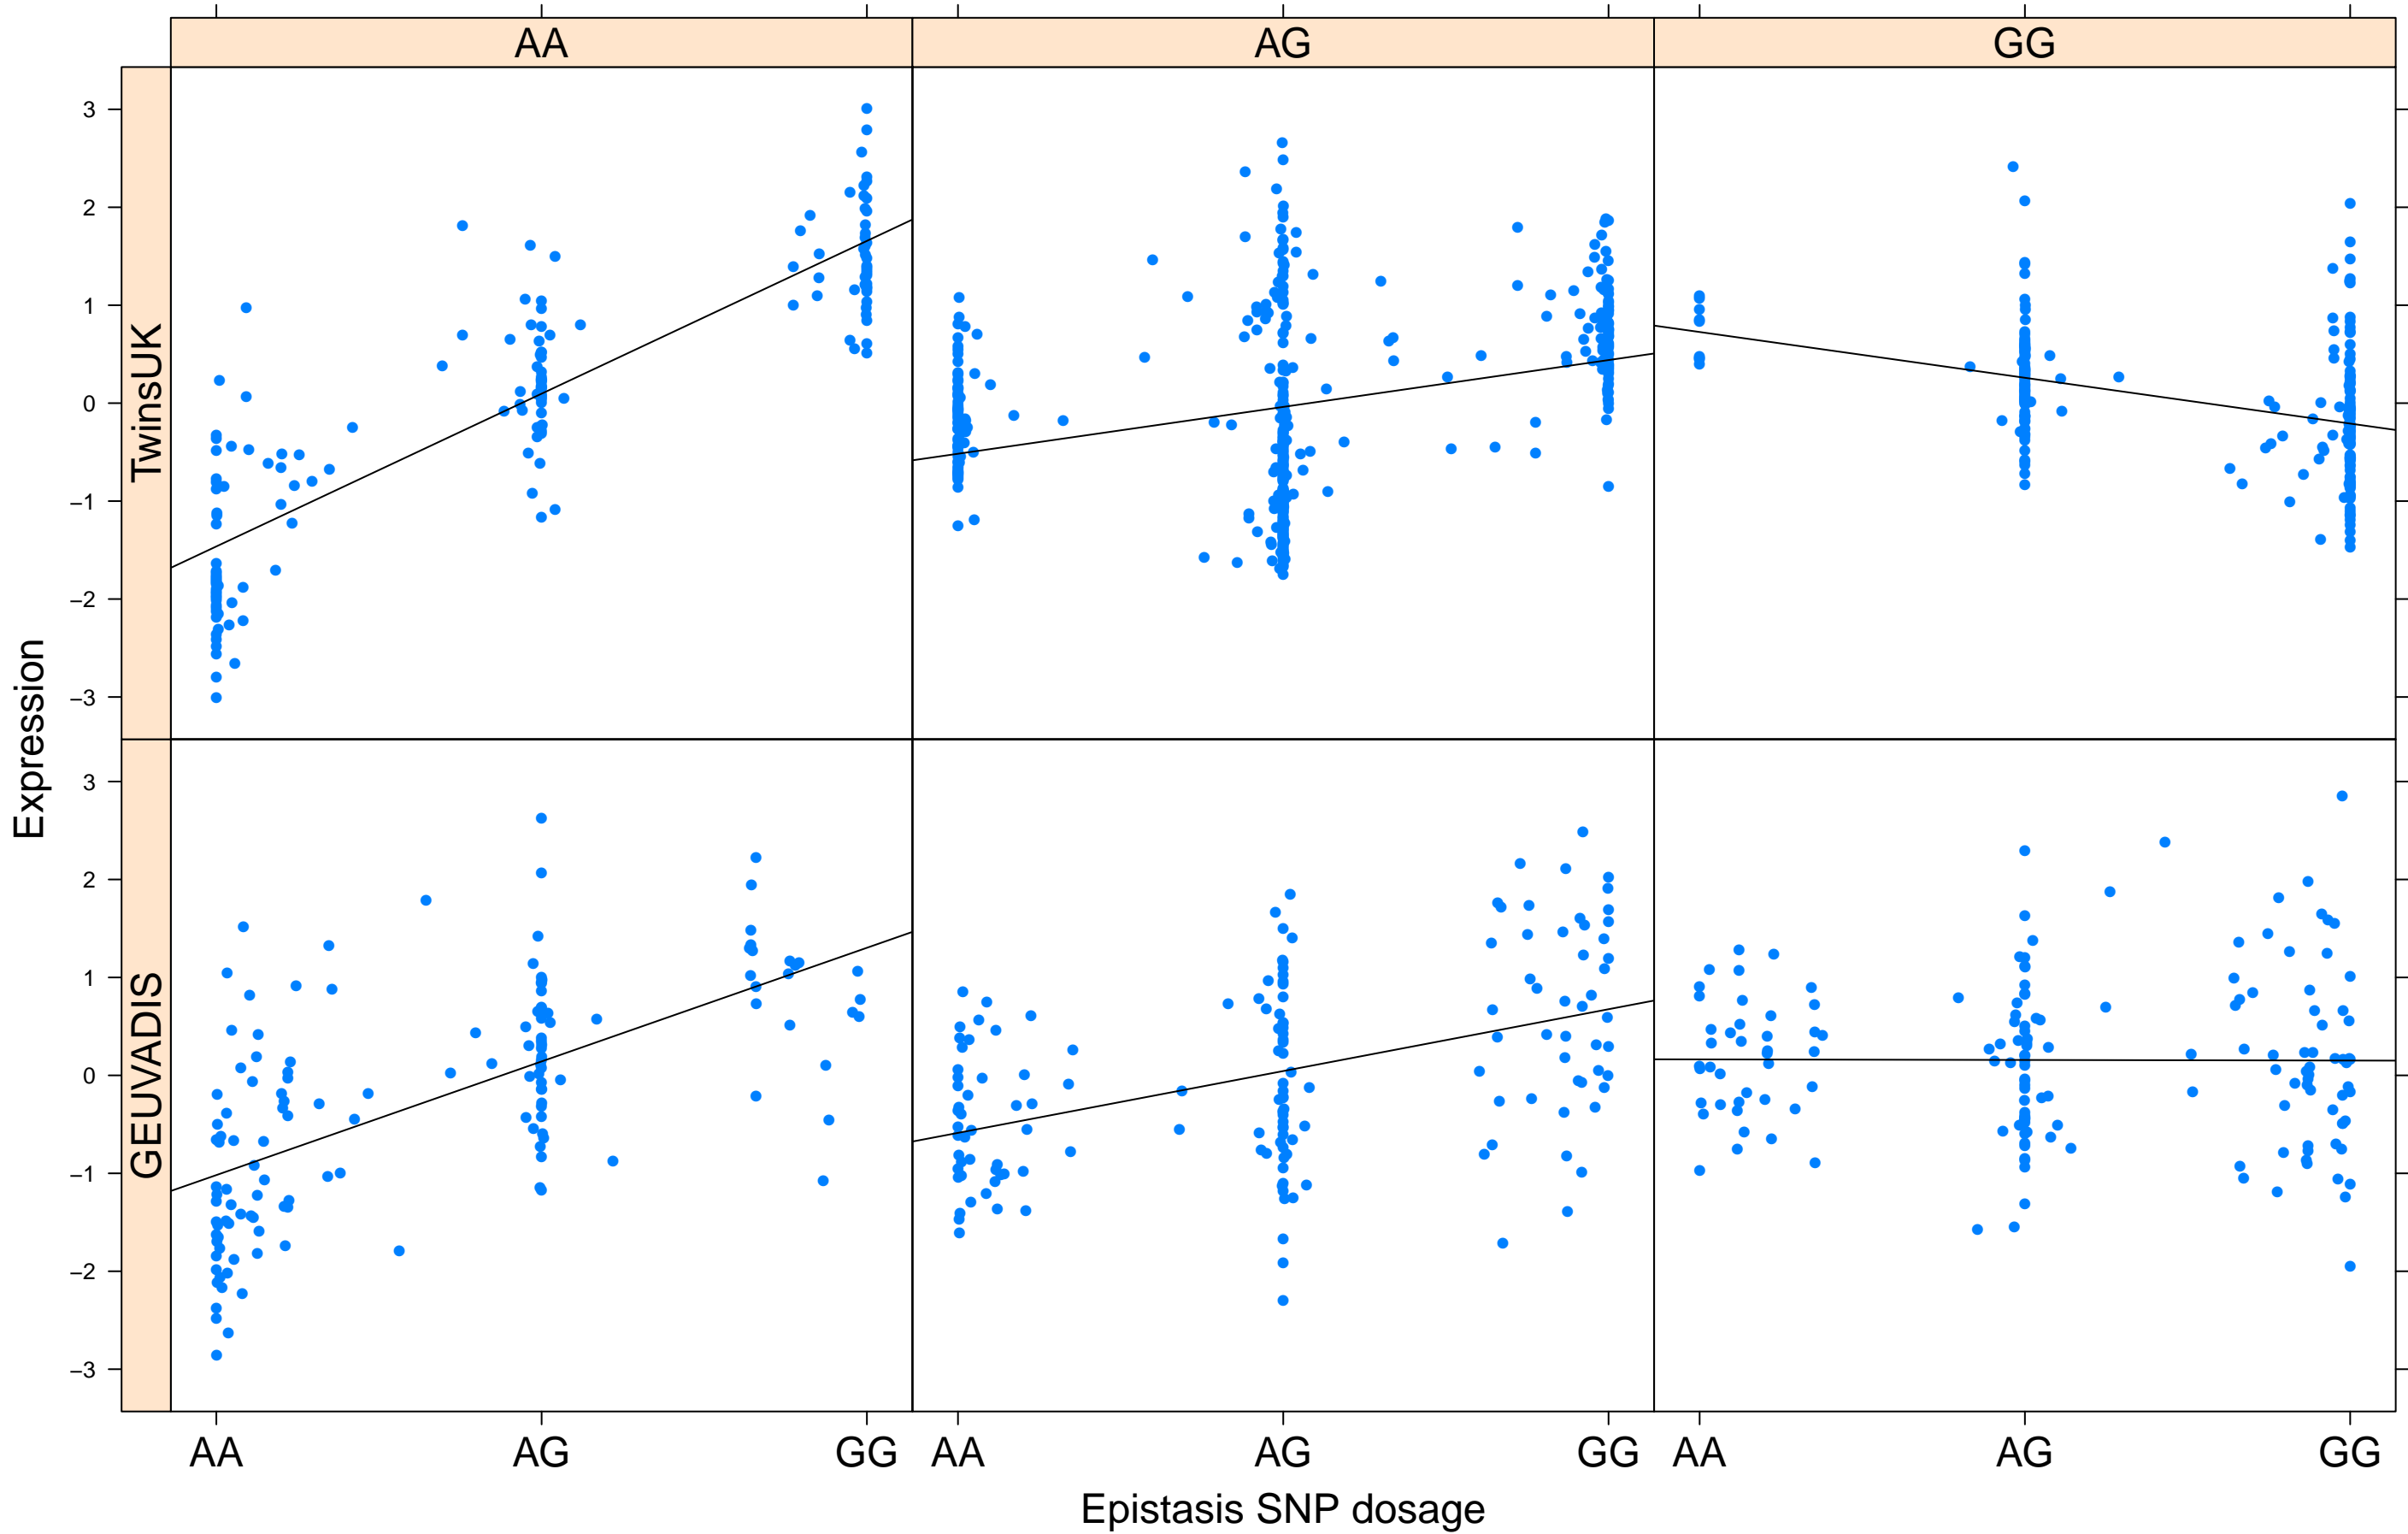

Supplement: supp [file elife_poa_e01381_Figure_2_figure_supplement_5.pdf › elife_poa_e01381_Figure_2_figure_supplement_5.pdf]

v-eQTL genotype group

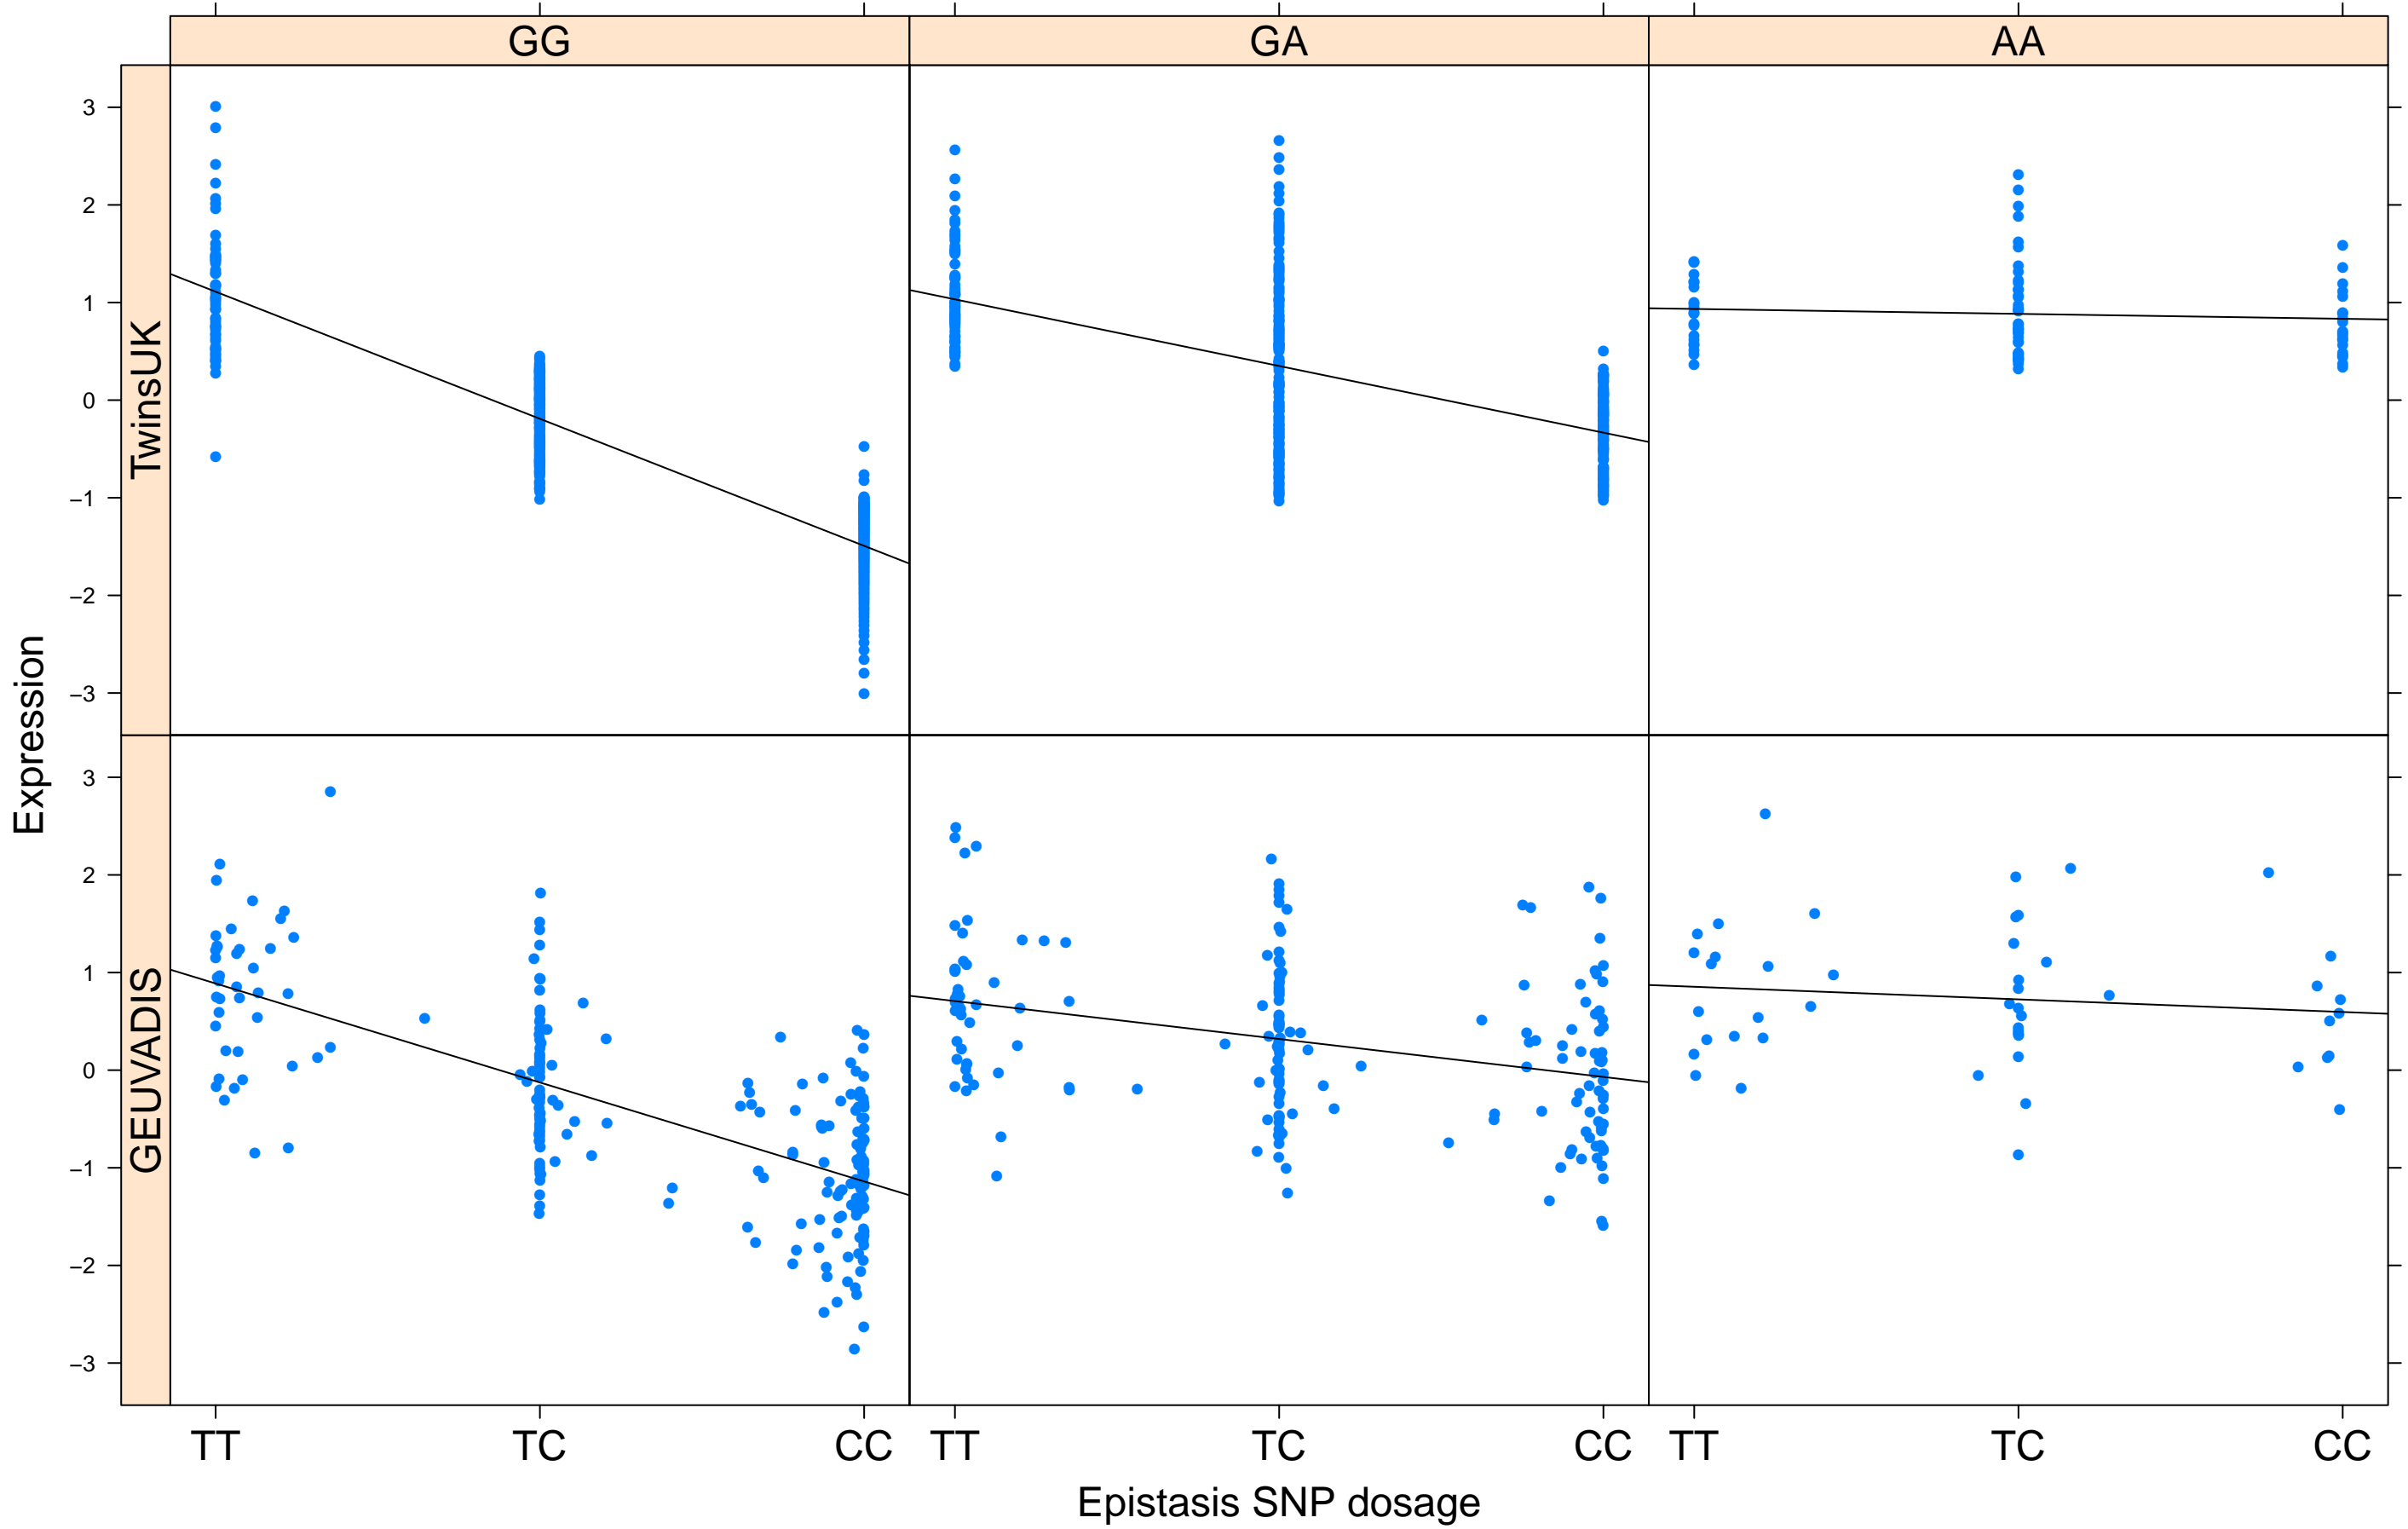

Supplement: supp [file elife_poa_e01381_Figure_2_figure_supplement_6.pdf › elife_poa_e01381_Figure_2_figure_supplement_6.pdf]

v-eQTL genotype group

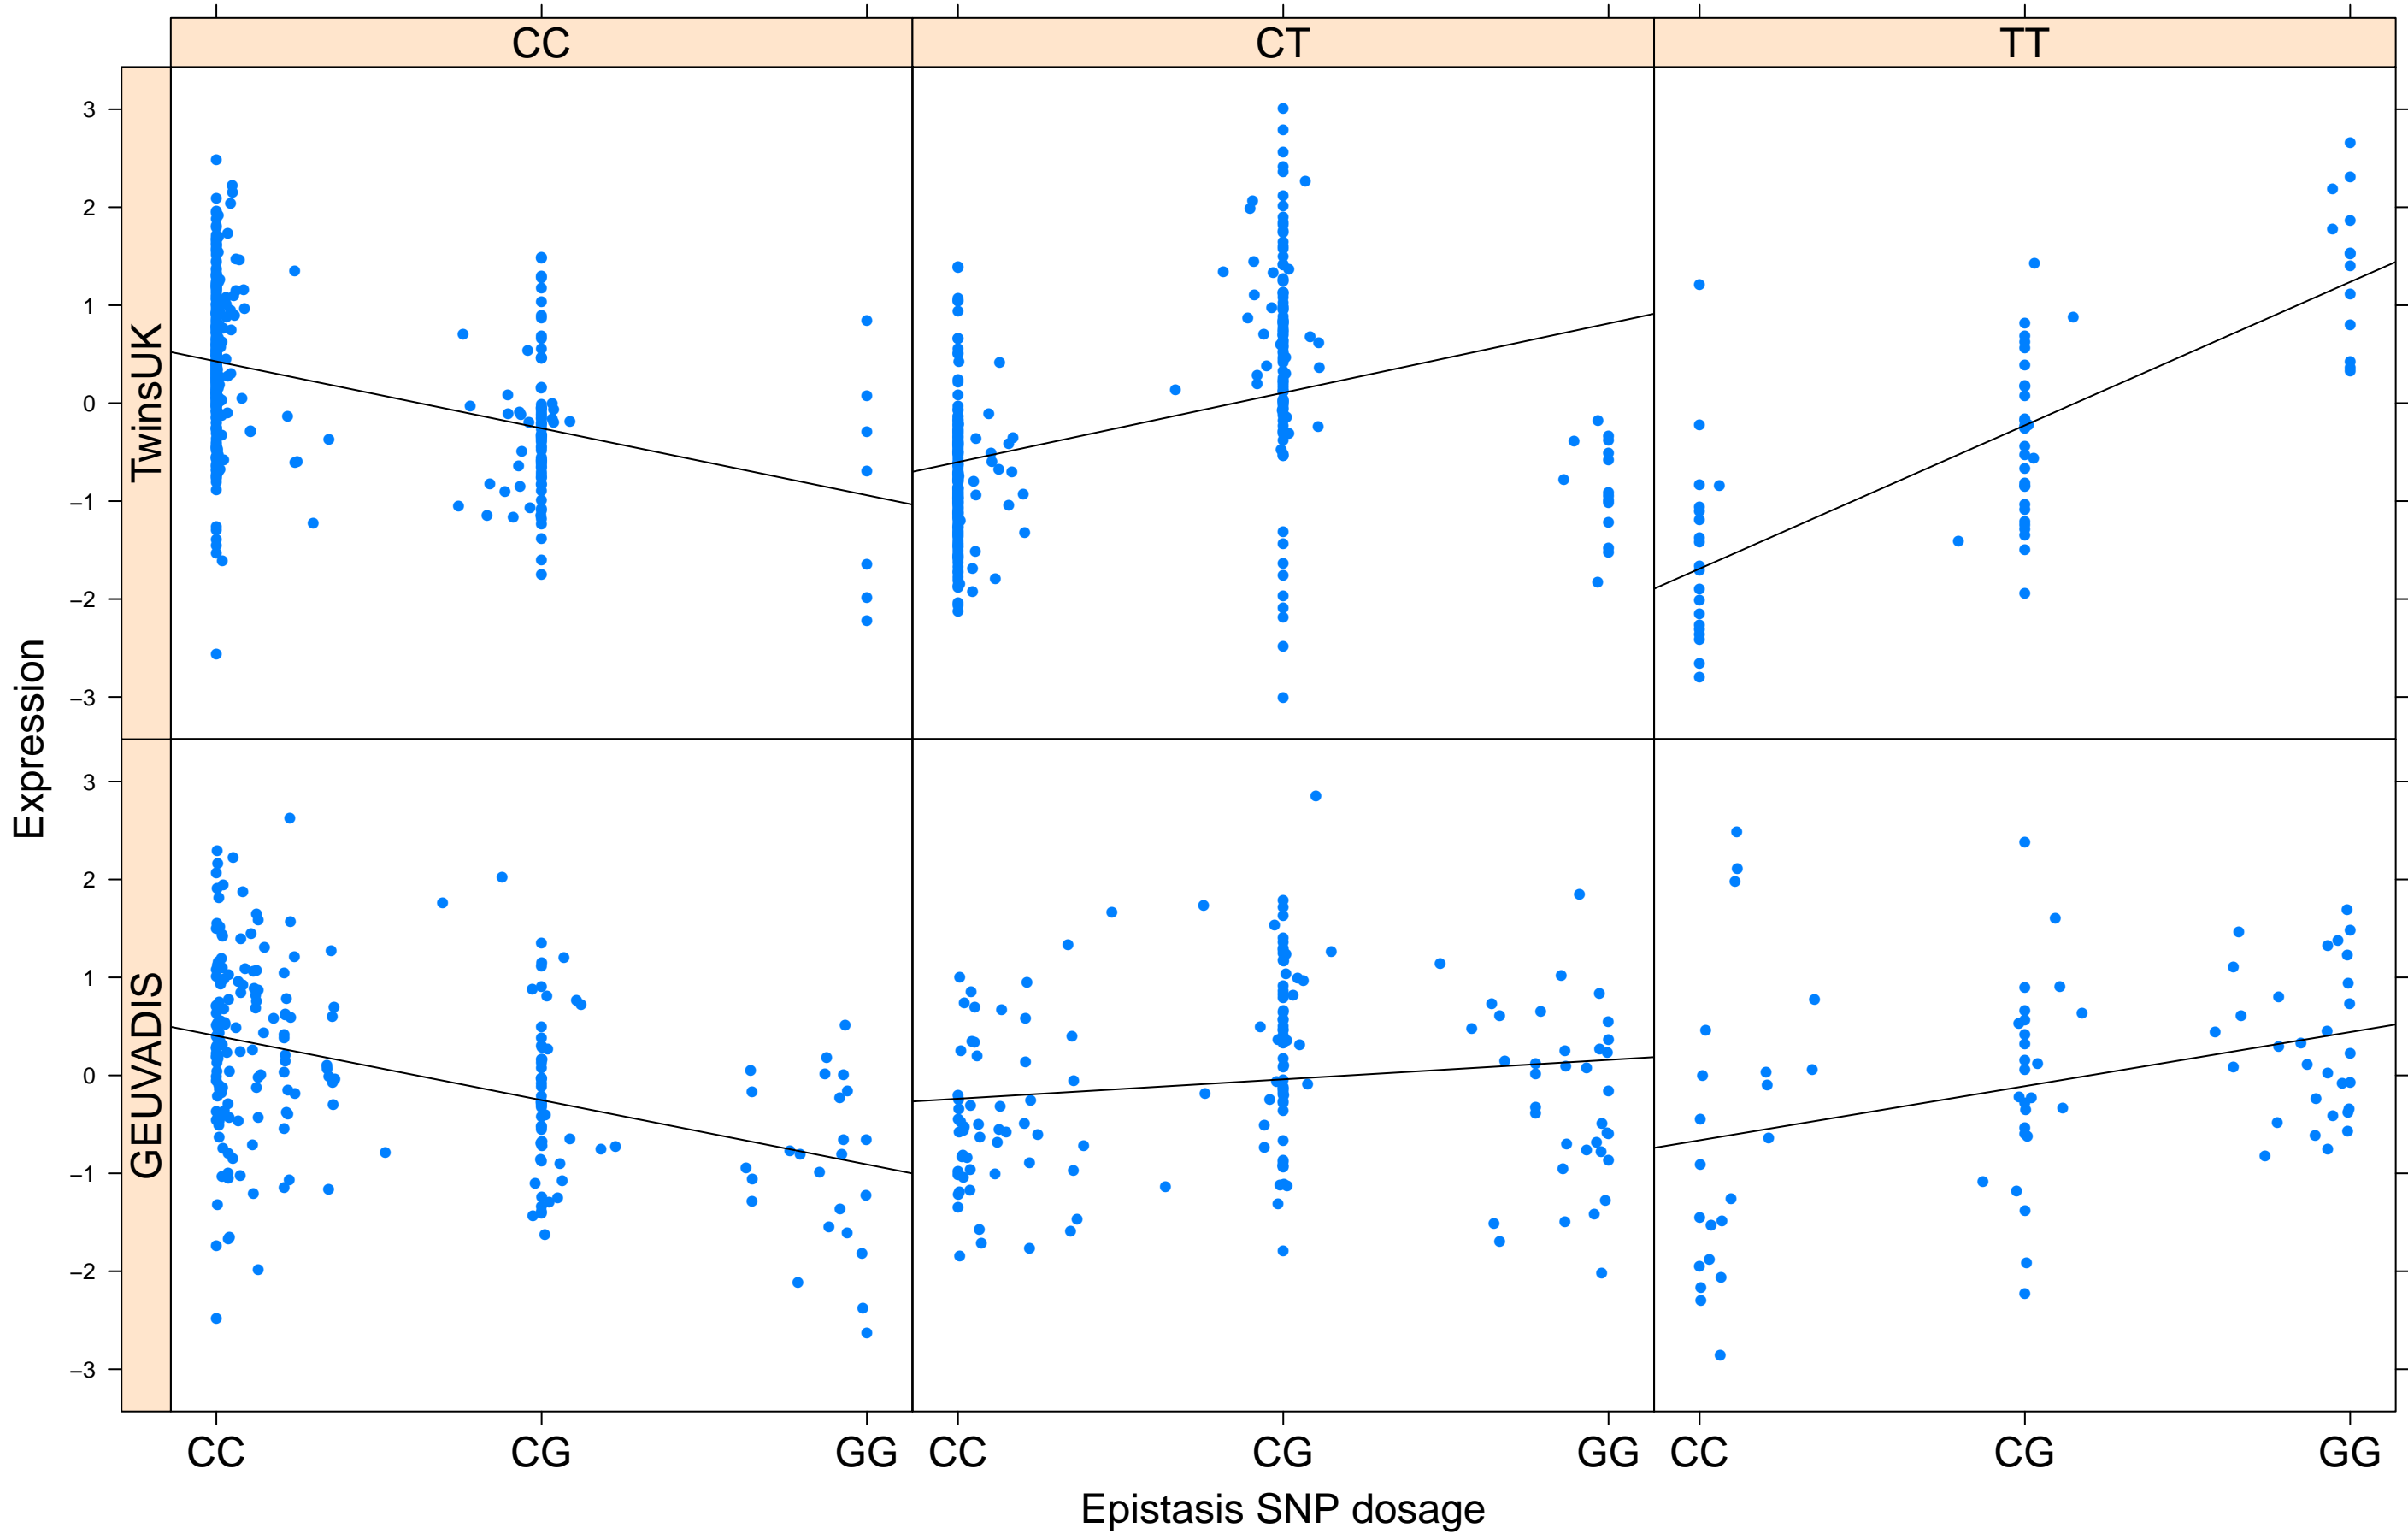

Supplement: supp [file elife_poa_e01381_Figure_2_figure_supplement_7.pdf › elife_poa_e01381_Figure_2_figure_supplement_7.pdf]

v-eQTL genotype group

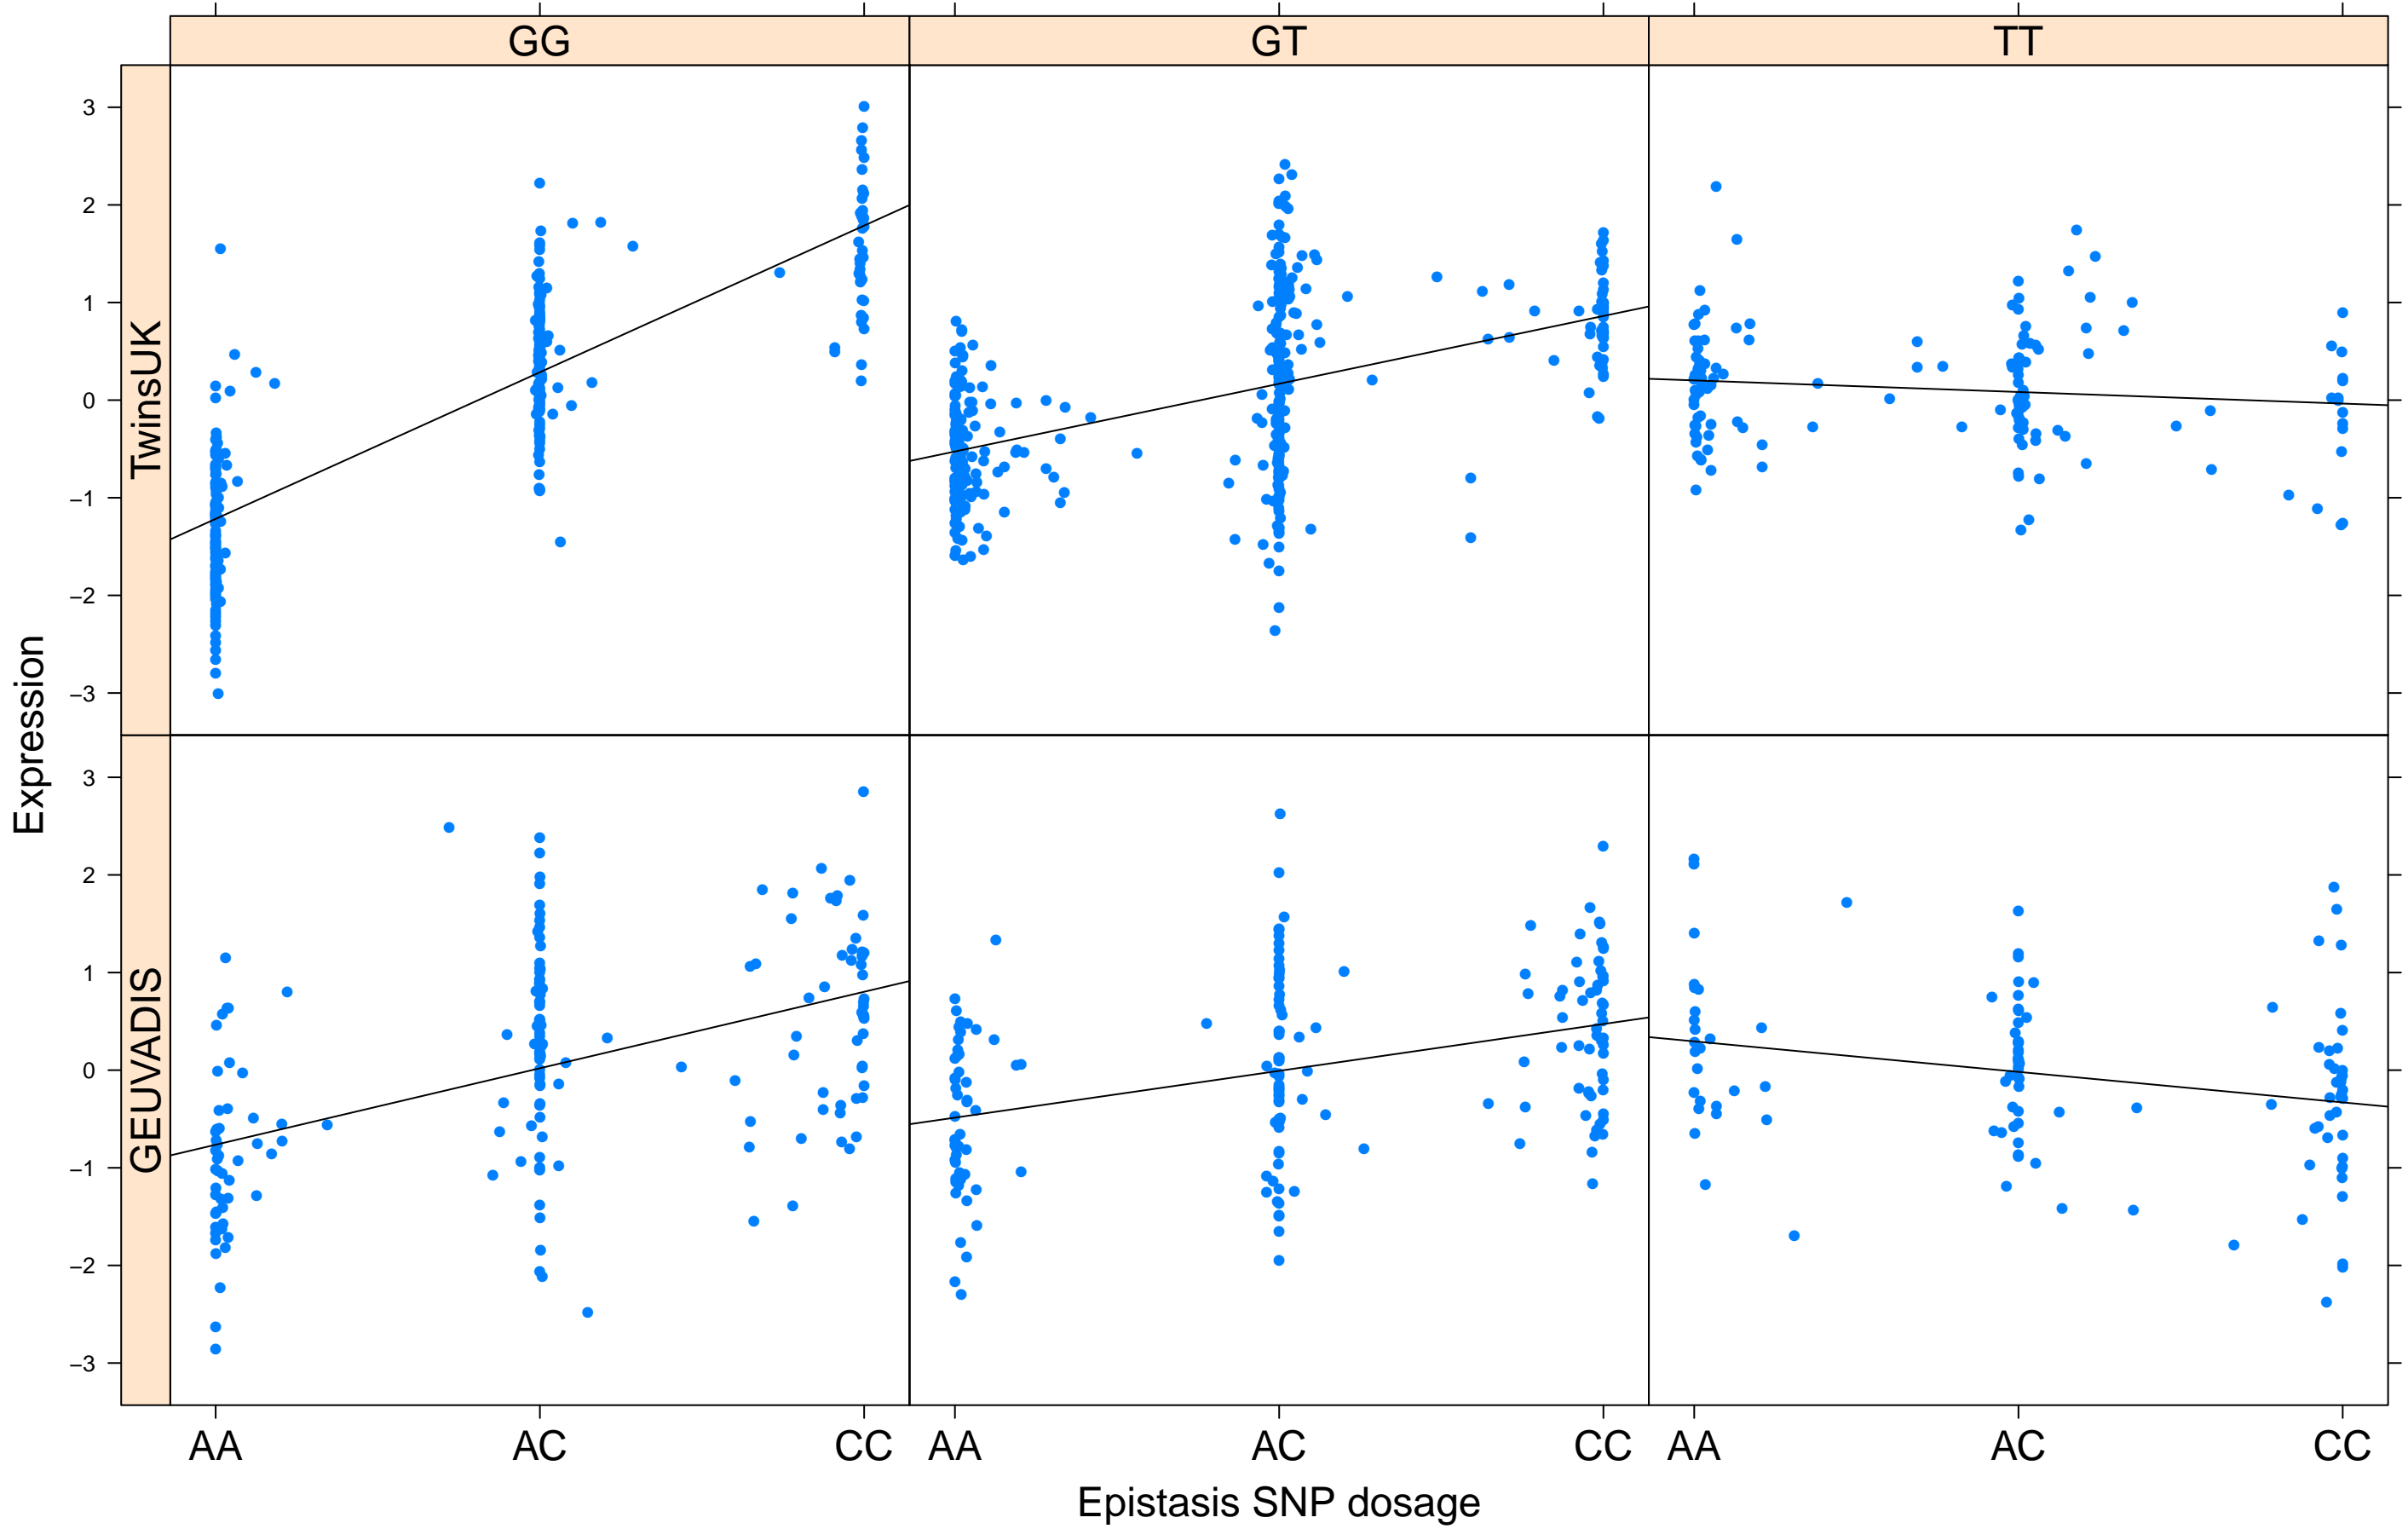

Supplement: supp [file elife_poa_e01381_Figure_2_figure_supplement_8.pdf › elife_poa_e01381_Figure_2_figure_supplement_8.pdf]

v-eQTL genotype group

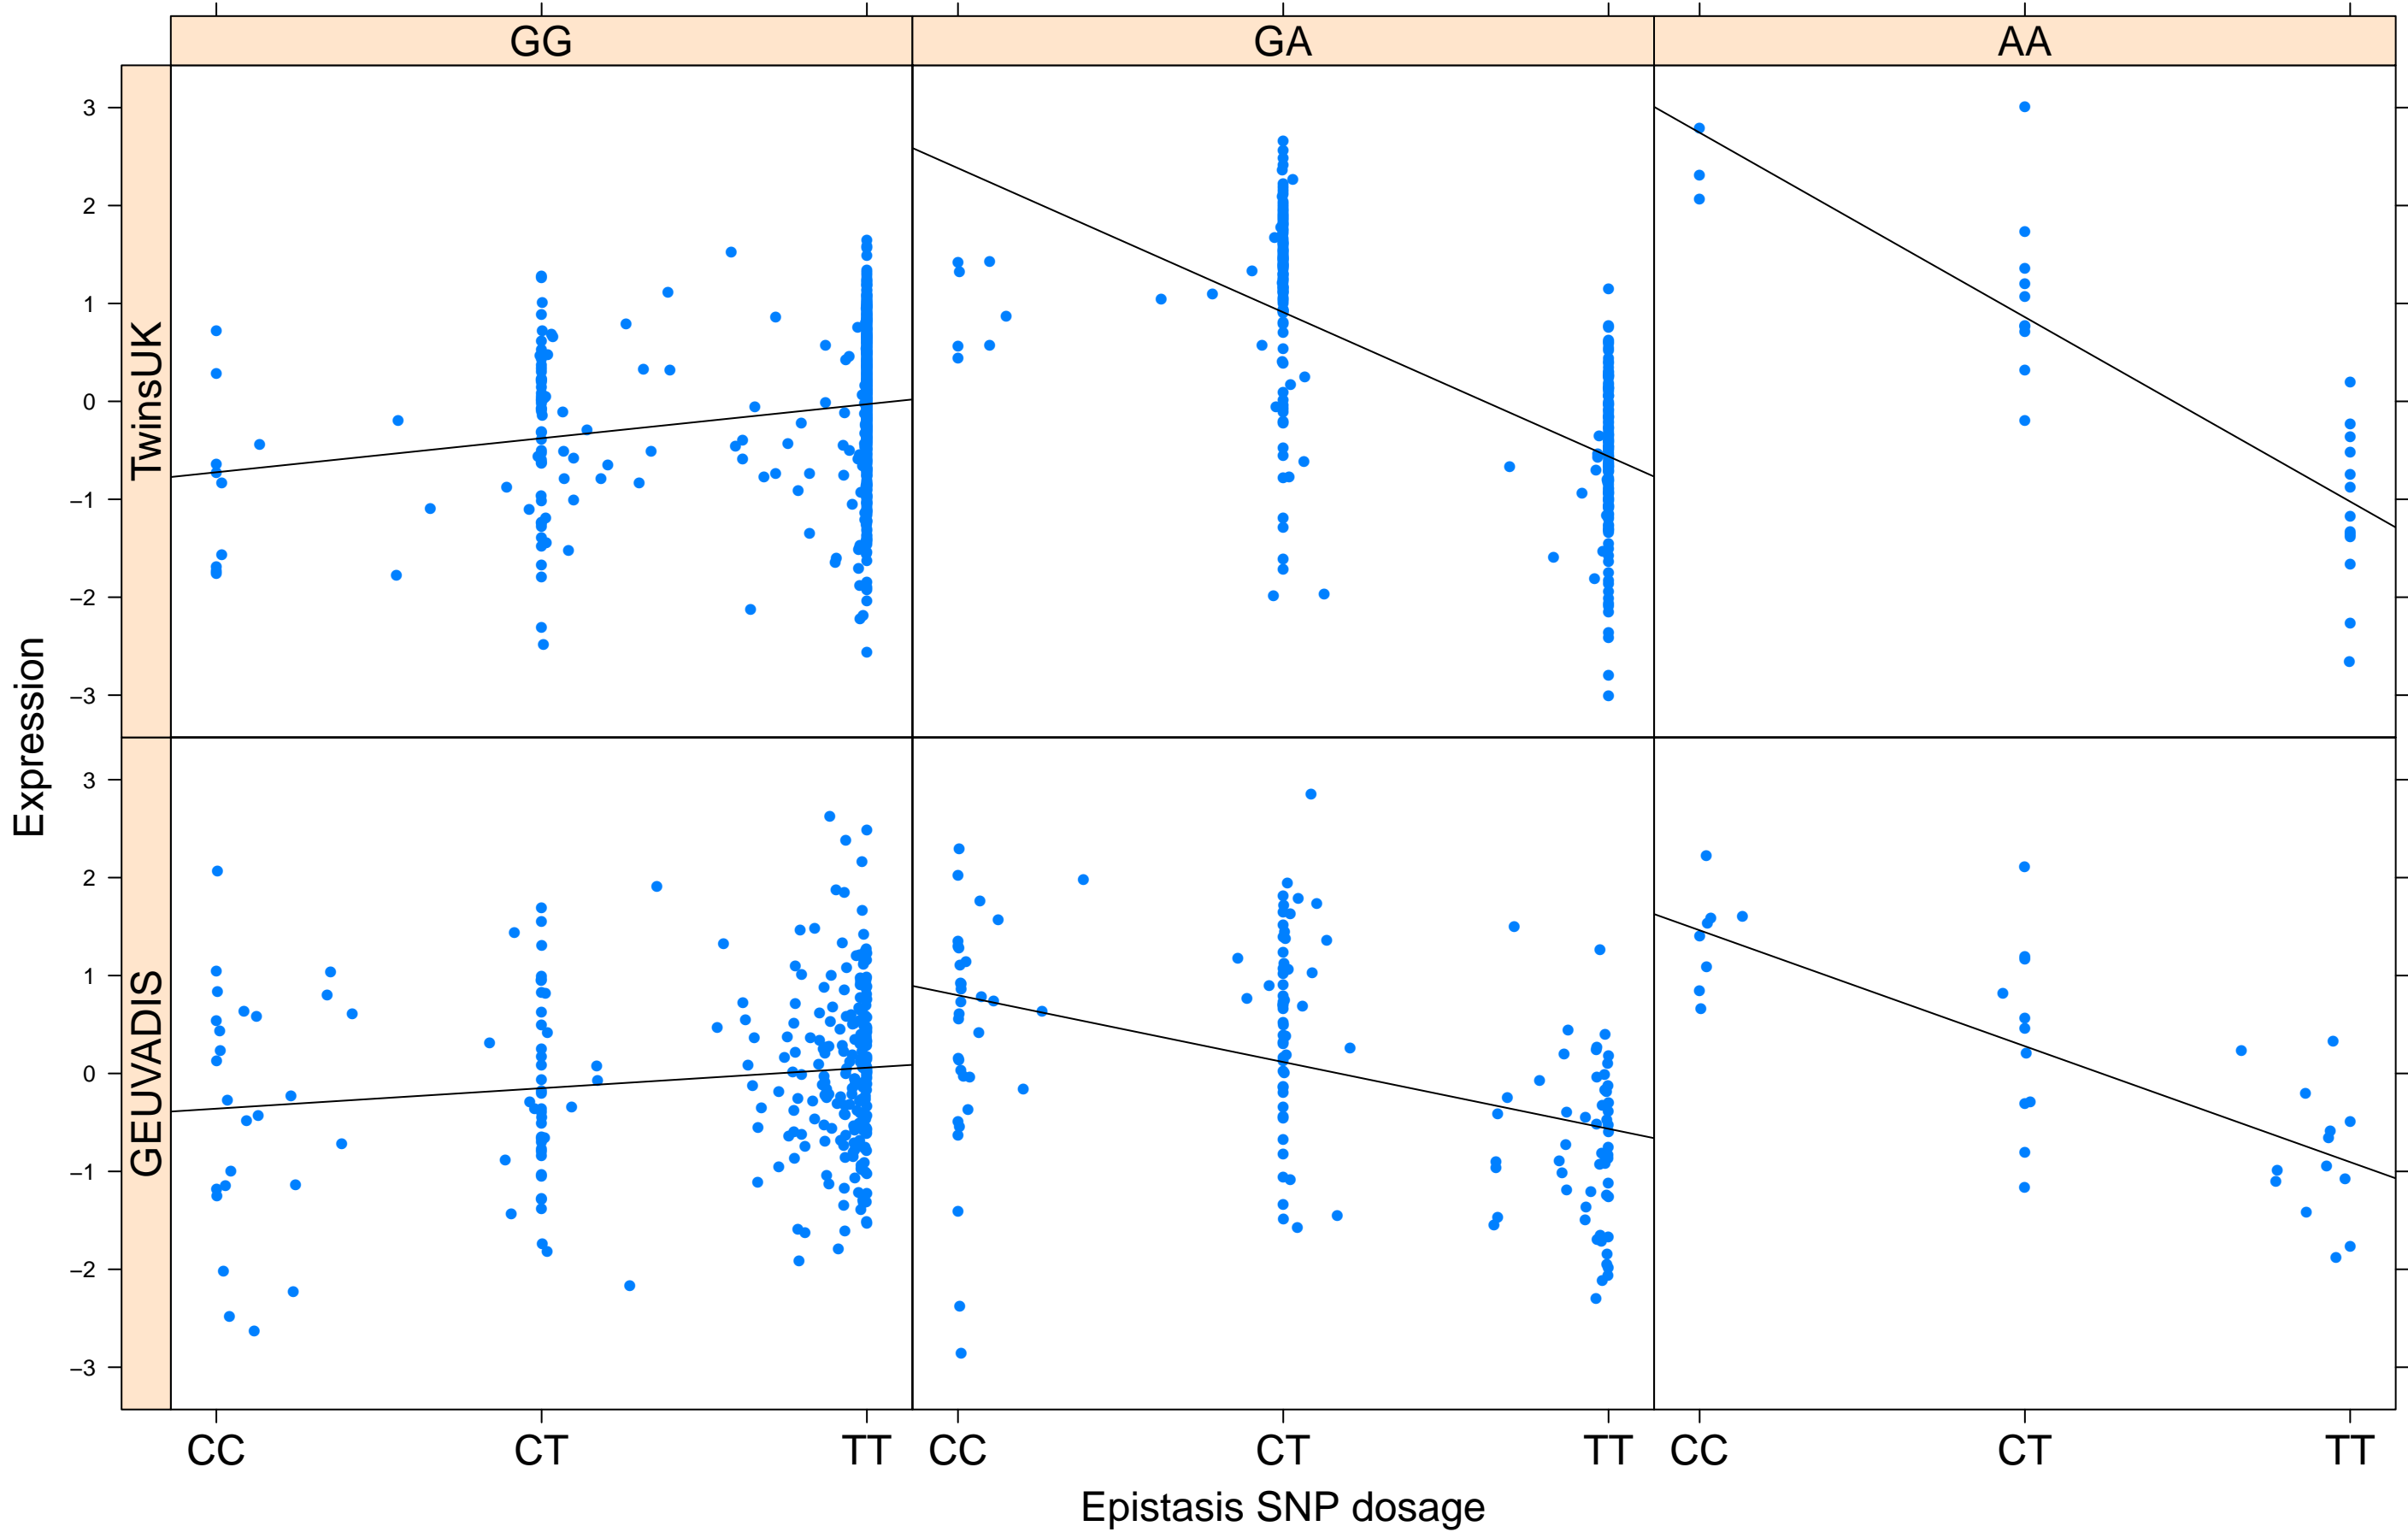

Supplement: supp [file elife_poa_e01381_Figure_2_figure_supplement_9.pdf › elife_poa_e01381_Figure_2_figure_supplement_9.pdf]
